# Supplementary material for: Exploring photophysical properties of metal-free coumarin sensitizers: an efficient strategy to improve the performance of dye-sensitized solar cells
Source: Royal Society of Chemistry journal article supplement (doi:10.1039/c4ra07904c), 2014-01-01
Supplement: c4ra07904c1.pdf [file c4ra07904c1.pdf]

Prepared for publication in *RSC Advances*

October 10, 2014

## **Exploring Photophysical Properties of Metal-free Coumarin Sensitizers: An Efficient Strategy to Improve Performance of Dye-sensitized Solar**

**Jinghui Wang,<sup>a</sup> Ming Li,<sup>a, b</sup> Dan Qi,<sup>a</sup> Wei Shen,<sup>a</sup> Rongxing He<sup>\*a, b</sup> and Sheng Hsien Lin<sup>c</sup>**

<sup>a</sup> *School of Chemistry and Chemical Engineering, Southwest University, Chongqing 400715, China; E-mail: [herx@swu.edu.cn](mailto:herx@swu.edu.cn)*

<sup>b</sup> *Education Ministry Key Laboratory on Luminescence and Real-Time Analysis, Southwest University, Chongqing 400715, China*

<sup>c</sup> *Department of Applied Chemistry, Institute of Molecular Science and Center for Interdisciplinary Molecular Science, National Chiao-Tung University, Hsinchu 300, Taiwan*

## Detailed discussion to confirm the significant role of $\pi$ -spacer of model dyes in promoting the performance of DSSCs

### Free dye

In this work, we firstly considered four parent coumarin-based sensitizers (NKX-2311, NKX-2677, NKX-2700 and NKX-2883) and combined the calculated results with experimental findings to confirm the significant role of  $\pi$ -spacer of sensitizers in promoting the  $J_{sc}$  of DSSCs. The only difference of structures for these four dyes is the  $\pi$ -spacers, as shown in Fig 1. As shown in Equation 1, the  $J_{sc}$  is determined by four factors: light harvest efficiency ( $\phi_{LHE}$ ), electron injection efficiency ( $\phi_{inject}$ ), charge collection efficiency ( $\phi_{cc}$ ) and the regeneration efficiency ( $\phi_{reg}$ ). We firstly discuss the function of different  $\pi$ -spacers in improving light harvesting efficiency ( $\phi_{LHE}$ ). Usually, the  $\phi_{LHE}$  is closely related with oscillator strength ( $f$ ) of coumarin dye associated to the  $\lambda$ , and it can be written as:

$$\phi_{LHE} = 1 - 10^{-f} \quad (1)$$

The maximum absorption wavelength ( $\lambda_{max}$ ) and corresponding oscillation strength ( $f$ ) and light harvesting efficiency ( $\phi_{LHE}$ ) for NKX-2311, NKX-2677, NKX-2700, and NKX-2883 are listed in Table 6S. As the  $\pi$ -spacer of NKX-2311 changes from vinylene unit to couple of thiophene moieties of NKX-2677, the red-shifted and strengthened Q band can be obtained, eventually resulting in higher light harvesting efficiency. Compared with NKX-2677, however, NKX-2700 and NKX-2883 display wider visible absorption bands, which are ascribed to the facts that the additional vinylene unit in NKX-2700 structure expands the  $\pi$ -system, and the auxiliary electron withdrawing -CN unit in NKX-2883 facilitates electron migration to the acceptor unit. Obviously, when the  $\pi$ -spacer of dye is expanded with introduction of different groups, the location of  $\lambda_{max}$  will red shift to a certain extent and follows the order of NKX-2311(459 nm) < NKX-2677 (508 nm) < NKX-2700 (527 nm) < NKX-2883(536 nm). Meanwhile, the values of  $\phi_{LHE}$  ( $\lambda_{max}$ ) comply with the sequence of NKX-2311(0.983) < NKX-2677 (0.986) < NKX-2700 (0.996)  $\approx$  NKX-2883 (0.994). Consequently, it is undoubtedly that the absorption of coumarin-based dyes can be extended to long-wavelength region leading to an improved spectral overlap with the solar spectrum, and the light-capturing ability can be enhanced through proper modification of the  $\pi$ -spacer, which would further improve the  $\phi_{LHE}$  for high short-circuit current density ( $J_{sc}$ ).

Generally, if the charge recombination process is effectively suppressed, the electron collection efficiency ( $\phi_{cc}$ ) will be improved. Clifford *et al* reported that the increase of link length of  $\pi$ -spacer could slow down the electron recombination rate. In our research, the length of  $\pi$ -spacers of these four model dyes follows the order of NKX-2311(3.796 Å) < NKX-2677 (9.215 Å) < NKX-2700 (11.674 Å)  $\approx$  NKX-2883 (11.225 Å). That is, the expansion of  $\pi$ -spacer will effectively inhibit the charge recombination efficiency, thereby improving electron collection efficiency ( $\phi_{cc}$ ). In addition, a favorable charge separation will facilitate electronic injection from excited dye to semiconductor surface, and then promote the photogenerated charge to be transported to the electrodes. Consequently, effective electron collection efficiency requires a good intramolecular charge separation with photoexcitation occurring. As shown in Table 1, the extension of the  $\pi$ -spacers prompts the electron densities of HOMOs of NKX-2677, NKX-2700 and NKX-2883 to distribute mainly on their donors (HOMO of NKX-2311 is delocalized over the whole dye molecule). Because of the almost same distribution of LUMOs' electron densities for these four dyes, the difference in HOMOs indicates more effective charge separation for NKX-2677, NKX-2700 and NKX-2883 comparing with NKX-2311, which leads to higher  $\phi_{cc}$  of NKX-2677, NKX-2700 and NKX-2883. Thus, extending the  $\pi$ -spacer of dye with diverse groups not only retards the charge recombination efficiency, but also improves charge separation for high electron collection efficiency ( $\phi_{cc}$ ).

Besides, the regeneration efficiency ( $\phi_{reg}$ ) can be evaluated by the driver force of dye regeneration. The driver force for dye regeneration is represented by HOMO level of sensitizers. From Table 4, the HOMO levels of the model dyes are decreased slightly with the expansion of  $\pi$ -spacers, which implies the modification of  $\pi$ -spacers has slight effect on the performance of regeneration. As we known, the electron injection efficiency,  $\phi_{inject}$ , depends on the competition between electron injection and charge recombination. Calculations shown that the driver force (see Table 4) for electron injection of these four dyes is sufficiently high, this induces the effective electron transfer from dye to semiconductor surface. Meanwhile, the charge recombination process is effectively suppressed by extending the linker of dyes. As a consequence, more effective electron injection can be obtained by modifying  $\pi$ -spacer of dyes.

Owing to broader absorption band in the NIR region and higher  $\phi_{LHE}$ , more effective charge separation and slower charge recombination, the values of  $J_{sc}$  for NKX-2677, NKX-2700 and NKX-2883 are increased greatly relative to that of NKX-2311, indicating higher  $\eta$  for the DSSCs based on NKX-2677, NKX-2700 and NKX-2883. The present results are in good agreement with

the experiment findings. Undoubtedly, the performance of DSSCs can be improved through appropriate modification of dye structure with suitable  $\pi$ -spacer.

### dye/ TiO<sub>2</sub> complexes

The simulated absorption spectra of NKX-2311/TiO<sub>2</sub>, NKX-2677/TiO<sub>2</sub>, NKX-2700/TiO<sub>2</sub> and NKX-2883/TiO<sub>2</sub> complexes are shown in Figures 1S-3S. Compared with the four isolated dyes (NKX-2311, NKX-2677, NKX-2700 and NKX-2883), the four dye-titania complexes achieve slight red-shift and broadening of the absorption peaks (the maximum absorption peaks are red-shifted by ~55, ~31, ~32 and ~20 nm, respectively, see Figure 1S and Table 4S), which are ascribed to the increased delocalization of the LUMO orbitals of the conjugated frameworks. Compared with NKX-2311/TiO<sub>2</sub>, one of the most remarkable absorption features of the other complexes is the red-shifted bands, and they complied with the sequence of NKX-2311(514 nm) < NKX-2677 (539 nm) < NKX-2700 (559 nm)  $\approx$  NKX-2883 (556 nm). This means that the extension of the length of  $\pi$ -space of dye could directly influence the absorption spectra of dye-titania complexes. Furthermore, the modification of the coumarin dye with various  $\pi$ -spacers significantly affects the oscillator strength of dye-titania complex. As listed in Table 4S, the oscillator strengths ( $f$ ) of these four dye-titania complexes are enhanced ( $f=2.025, 2.210, 2.710$  and  $2.627$  for NKX-2311/TiO<sub>2</sub>, NKX-2677/TiO<sub>2</sub>, NKX-2700/TiO<sub>2</sub> and NKX-2883/TiO<sub>2</sub>), which subsequently improves the light harvesting efficiency of these complexes. Therefore, proper modification of the bridge of free dyes would directly improve the optical performance of dye-titania complexes. It is notable that no new bands are observed in the absorption spectra of the four dye-titania complexes relative to the four isolated dyes, indicating in present case the electron injection should adopt the indirect mechanism from donor of dye to semiconductor surface via acceptor ( $\pi$ -spacer and anchor groups).

The absorption spectra for these four complexes consist of many photo-excitations. Some of these excitations having relatively high oscillator strength are presented in Table 4S. For these four complexes, most of these photo-excitations originate from HOMO and HOMO-1 except NKX-2311(only from HOMO). The electron densities of HOMO and HOMO-1 are mainly localized on dye part of the complexes and are similar to the HOMO and HOMO-1 of isolated dyes, as shown in Figures 5S-7S. From Table 4S, the unoccupied orbitals that participate in the major excitations come from LUMO. Besides, there are some other molecular orbitals involved in the major excitations, such as LUMO+1 and LUMO+16 of NKX-2677/TiO<sub>2</sub> complex. Among these unoccupied orbitals, LUMO shows highest contribution and is shown in Figure 5S. Remarkably, for LUMO orbital of these four complexes, only a few electron densities are delocalized on the cluster, indicating a weak interaction between excited dye and the surface of TiO<sub>2</sub>, which favors the indirect mechanism for electron injection again.

After binding to titanium there is a redistribution of energy levels. The computed Kohn-Sham orbital energy levels for isolated dyes, (TiO<sub>2</sub>)<sub>16</sub> cluster and dye/TiO<sub>2</sub> complexes are presented in Figure 4. The green line represents localization of molecular orbital both on the dye and the surface, blue denotes localization of molecular orbital on TiO<sub>2</sub> and red represents localization of molecular orbital on dyes. As reported in previous studies, the higher the LUMO is located in the semiconductor conduction band, the more efficient the electron injection is. From Figure 4, for all complexes, the LUMO is higher relative to the lower edge of the TiO<sub>2</sub> conduction band, which makes the electron injection be easy. As we have testified before, the absorption properties of NKX-2883 are comparable to those of NKX-2700, the former is even more outstanding. However, the  $\eta$  of NKX-2883-based DSSCs is slightly lower than that of NKX-2700-based DSSCs because the LUMO of NKX-2883/TiO<sub>2</sub> complex is relatively lower than that of NKX-2700/TiO<sub>2</sub> complex, eventually reducing the efficiency of electron injection of NKX-2883. In addition, the partial and total densities of states for absorbed dyes have been calculated (Figure 4S). We notice that for all complexes, their unoccupied molecular orbitals have small overlap with the conduction band of TiO<sub>2</sub>, and the overlap is slightly improved with the alteration of the  $\pi$ -spacer of dyes, indicating weak electronic coupling between dyes and TiO<sub>2</sub>. It confirms again that the extension of the length of  $\pi$ -bridge with thienyl, vinylene or -CN groups has important influence on electronic coupling between dyes and TiO<sub>2</sub>.

Overall, for these four systems, the absorption properties of dye/TiO<sub>2</sub> complexes are closely related to those of their free dyes. The extension of  $\pi$ -space of dyes with different groups effectively improves the optical performance of dye/TiO<sub>2</sub> complexes. Thus, rationally modification of the  $\pi$ -spacer can improve absorption spectra, re-shift orbital energy levels, and further boosts the performance of DSSCs.

## Figure Captions

**Fig. 1S** (a) Simulated optical absorption for free sensitizers (b) Simulated absorption spectra for dyes absorbed on  $\text{Ti}_{16}\text{O}_{32}$  cluster. The absorption spectra are simulated using M062X functional with 6-31g(d,p) basis set

**Fig. 2S** (a) Simulated optical absorption for free sensitizers (b) Simulated absorption spectra for dyes absorbed on  $\text{Ti}_{16}\text{O}_{32}$  cluster. The absorption spectra are simulated using B3LYP functional with 6-31g(d,p) basis set

**Fig. 3S** (a) Simulated optical absorption for free sensitizers (b) Simulated absorption spectra for dyes absorbed on  $\text{Ti}_{16}\text{O}_{32}$  cluster. The absorption spectra are simulated using PBE0 functional with 6-31g(d,p) basis set

**Fig. 4S** Total densities of states (TDOS) and partial densities of states (PDOS) for the eight coumarin-based dyes (the blue dashed line corresponds to TDOS, the red full line corresponds to  $\text{TiO}_2$  (PDOS), and the black line corresponds to dye (PDOS)).

**Fig. 5S** Molecular orbitals relevant during photoexcitation for: 2311/ $\text{TiO}_2$ , 2677/ $\text{TiO}_2$ , 2700/ $\text{TiO}_2$ , 2883/ $\text{TiO}_2$ , 2883-P1/ $\text{TiO}_2$ , 2883-P2/ $\text{TiO}_2$ , 2883-Q1/ $\text{TiO}_2$  and 2883-Q2/ $\text{TiO}_2$  complexes. (M062X)

**Fig. 6S** Molecular orbitals relevant during photoexcitation for: 2311/ $\text{TiO}_2$ , 2677/ $\text{TiO}_2$ , 2700/ $\text{TiO}_2$ , 2883/ $\text{TiO}_2$ , 2883-P1/ $\text{TiO}_2$ , 2883-P2/ $\text{TiO}_2$ , 2883-Q1/ $\text{TiO}_2$  and 2883-Q2/ $\text{TiO}_2$  complexes. (B3LYP)

**Fig. 7S** Molecular orbitals relevant during photoexcitation for: 2311/ $\text{TiO}_2$ , 2677/ $\text{TiO}_2$ , 2700/ $\text{TiO}_2$ , 2883/ $\text{TiO}_2$ , 2883-P1/ $\text{TiO}_2$ , 2883-P2/ $\text{TiO}_2$ , 2883-Q1/ $\text{TiO}_2$  and 2883-Q2/ $\text{TiO}_2$  complexes. (PBE0)

**Fig. 8S** Frontier molecular orbital spatial distribution for free dyes (B3LYP)

**Fig. 9S** Frontier molecular orbital spatial distribution for free dyes (PBE0)

**Fig. 10S** Calculated UV/Vis absorption spectra four series sensitizers in ethanol solution obtained by using B3LYP functional with 6-31G(d,p) basis set, (a) NKX-2677, NKX-2677-P1 and NKX-2677-P2; (b) NKX-2700, NKX-2700-P1 and NKX-2700-P2; (c) NKX-2883, NKX-2883-P1 and NKX-2883-P2; (d) NKX-2883, NKX-2883-Q1 and NKX-2883-Q2

**Fig. 11S** Calculated UV/Vis absorption spectra four series sensitizers in ethanol solution obtained by using PBE0 functional with 6-31G(d,p) basis set, (a) NKX-2677, NKX-2677-P1 and NKX-2677-P2; (b) NKX-2700, NKX-2700-P1 and NKX-2700-P2; (c) NKX-2883, NKX-2883-P1 and NKX-2883-P2; (d) NKX-2883, NKX-2883-Q1 and NKX-2883-Q2

**Fig. 12S** Molecular orbital energy level (eV) diagram of (column 1) 2311/ $\text{TiO}_2$  complex, (column 2) NKX-2311 dye, (column 3) 2677/ $\text{TiO}_2$  complex, (column 4) NKX-2677 dye, (column 5) 2700/ $\text{TiO}_2$  complex, (column 6) NKX-2700, (column 7) 2883/ $\text{TiO}_2$  complex, (column 8) NKX-2883 dye, (column 9) isolated  $\text{TiO}_2$ , (column 10) NKX-2883-P1 dye, (column 11) 2883-P1/ $\text{TiO}_2$  complex, (column 12) NKX-2883-P2 dye, (column 13) 2883-P2/ $\text{TiO}_2$  complex, (column 14) NKX-2883-Q1 dye, (column 15) NKX-2883-Q1/ $\text{TiO}_2$  complex, (column 16) NKX-2883-Q2 dye, (column 17) 2883-Q2/ $\text{TiO}_2$  complex in ethanol solution. Green represents localization of molecular orbital both on the dye and the surface. Blue represents localization of molecular orbital on  $\text{TiO}_2$ . Red represents localization of molecular orbital on dyes (B3LYP)

## Table Captions

**Table 1S** Transition energies (in eV) of  $S_0$ - $S_1$  transition for NKX-23111, NKX-2677, KNX-2700 and NKX-2883 coumarin dyes in ethanol solution with B3LYP/6-31g(d,p) geometries

**Table 2S** The HOMO energy levels (in eV) and corresponding oxidized potential (vs NHE, in eV) of ground state ( $E_{ox(dye)}$ ) for NKX-2311, NKX-2677, NKX-2700, and NKX-2883. All values are calculated with B3LYP/6-31g(d,p) geometries

**Table 3S** Transition energies (in eV) of  $S_0$ - $S_1$  transition for dyes (NKX-23111, NKX-2677, KNX-2700 and NKX-2883) in ethanol solution. Geometries structures are optimized with different functionals.

**Table 4S** Electronic transition data obtained by TD-M062X/6-31g(d,p) level for all free dyes and dye-titania complexes in ethanol solution with B3LYP/6-31g(d,p) geometries

**Table 5S** Estimated  $\Delta G_{(aq)}$ ,  $\Delta G^0$ ,  $\Delta E_{ver}$ ,  $E_{ox(dye)}$ ,  $\Delta G_{reg}$ ,  $f$  and  $LHE$  for all coumarin sensitizers. All calculation is obtained by M062X functional with b-31g(d,p) basis set

**Table 6S** Maximum absorption wavelength ( $\lambda_{max}$ ) and the corresponding oscillation strength ( $f$ ) and light harvest efficiency ( $\phi_{LHE}$ ) for NKX-2311, NKX-2677, NKX-2700, and NKX-2883

**Table 7S** Estimated  $\Delta G_{(aq)}$ ,  $\Delta G^0$ ,  $\Delta E_{ver}$ ,  $E_{ox(dye)}$ ,  $\Delta G_{reg}$ ,  $f$  and  $LHE$  for all coumarin sensitizers. All calculation is obtained by B3LYP functional with b-31g(d,p) basis set

**Table 8S** Electronic transition data obtained by TD-B3LYP/6-31g(d,p) level for all free dyes and dye-titania complexes in ethanol solution with B3LYP/6-31g(d,p) geometries

**Table 9S** Electronic transition data obtained by TD-PBE0/6-31g(d,p) level for all free dyes and dye-titania complexes in ethanol solution with B3LYP/6-31g(d,p) geometries

**Table 10S** Electron density difference plots of electronic transition  $S_0 \rightarrow S_1$  for each coumarin dyes performed in ethanol solution using the B3LYP functional with 6-31G(d,p) basis set.  $L$  is the electron transfer distance ( $\text{\AA}$ );  $\Delta e$  is the fraction of electron exchange ( $|e^-|$ ),  $\Omega$  is overlaps between the regions of density depletion and increment. (Isovalue:  $4 \times 10^{-4} \text{ e au}^{-3}$ )

**Table 11S** Electron density difference plots of electronic transition  $S_0 \rightarrow S_1$  for each coumarin dyes performed in ethanol solution using the PBE0 functional with 6-31G(d,p) basis set.  $L$  is the electron transfer distance ( $\text{\AA}$ );  $\Delta e$  is the fraction of electron exchange ( $|e^-|$ ),  $\Omega$  is overlaps between the regions of density depletion and increment. (Isovalue:  $4 \times 10^{-4} \text{ e au}^{-3}$ )

**Table 12S** Electron density difference plots of electron transitions with oscillation strength larger than 0.1 for all dyes using M062X functional

**Table 13S** Electron density difference plots of electron transitions with oscillation strength larger than 0.1 for all dyes using B3LYP functional

**Table 14S** Electron density difference plots of electron transitions with oscillation strength larger than 0.1 for all dyes using PBE0 functional

**Table 15S** Calculated HOMO, LUMO energy levels (eV) of all sensitizers and the HOMO, LUMO energy levels (eV) of the donor (coumarin343) and the acceptor (conjugated  $\pi$ -spacer and anchoring group) fragments of all sensitizer obtained by B3LYP functional

**Table 16S** Calculated HOMO, LUMO energy levels (eV) of all sensitizers and the HOMO, LUMO energy levels (eV) of the donor (coumarin343) and the acceptor (conjugated  $\pi$ -spacer and anchoring group) fragments of all sensitizer obtained by M062X functional

**Table 17S** Molecular orbital composition (in %) of the highest occupied and two lowest unoccupied molecular orbital of the twelve coumarin sensitizers performed in ethanol solvent using B3LYP functional and the 6-31G(d,p) basis set.

**Table 18S** Molecular orbital composition (in %) of the highest occupied and two lowest unoccupied molecular orbital of the twelve coumarin sensitizers performed in ethanol solvent using PBE0 functional and the 6-31G(d,p) basis set.

**Table 19S** Estimated energy (a.u) of the oxidized coumarin dyes in ethanol solvent using PBE0 functional and the 6-31G(d,p) basis set

**Table 20S** Estimated energy(a.u) of the oxidized coumarin dyes in ethanol solvent using B3LYP functional and the 6-31G(d,p) basis set

**Table 21S** Estimated energy (a.u) of the oxidized coumarin dyes in ethanol solvent using M062X functional and the 6-31G(d,p) basis set

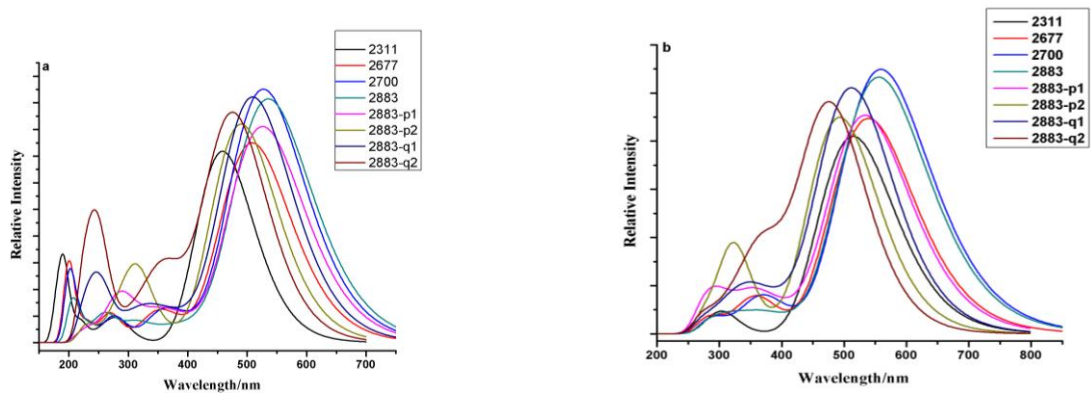

**Fig. 1S** (a) Simulated optical absorption for free sensitizers (b) Simulated absorption spectra for dyes adsorbed on  $Ti_{16}O_{32}$  cluster. The absorption spectra are simulated using M062X functional with 6-31G(d,p) basis set

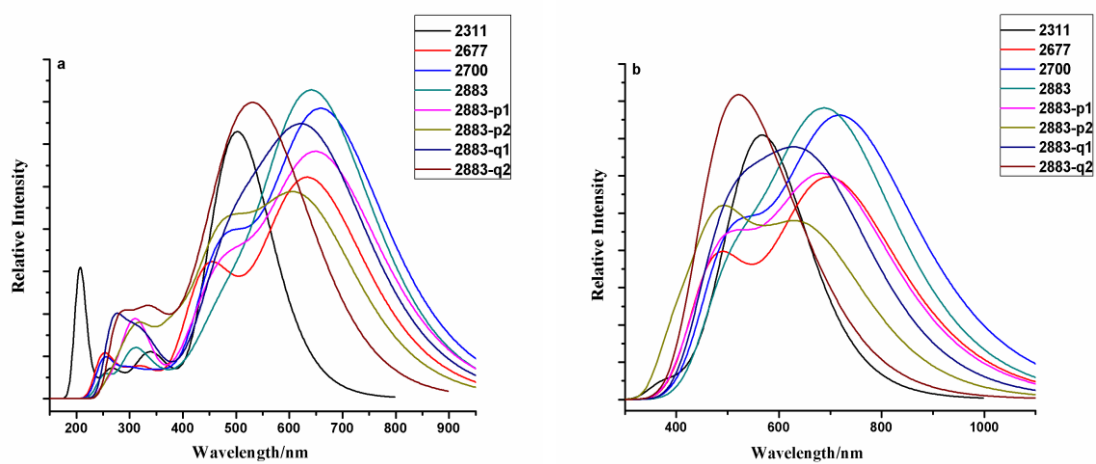

**Fig. 2S** (a) Simulated optical absorption for free sensitizers (b) Simulated absorption spectra for dyes absorbed on  $Ti_{16}O_{32}$  cluster. The absorption spectra are simulated using B3LYP functional with 6-31G(d,p) basis set.

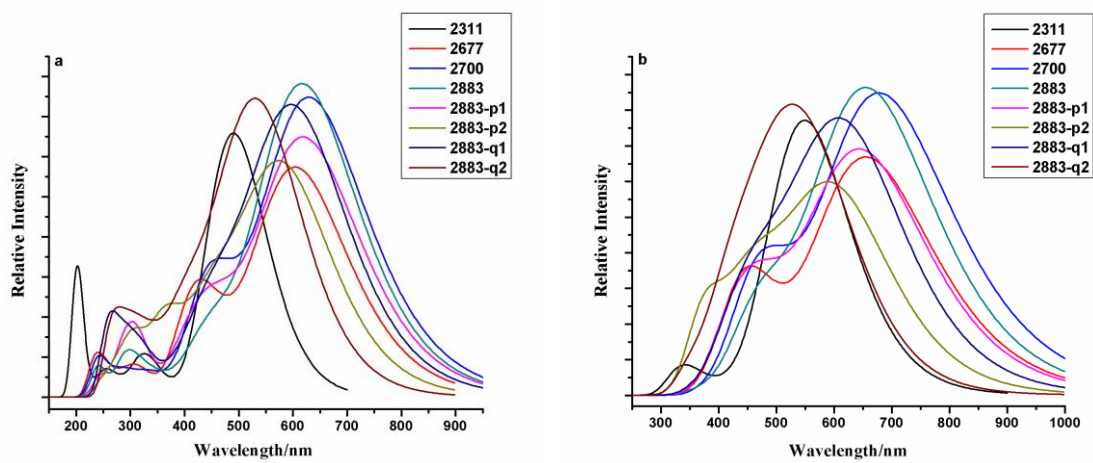

**Fig. 3S** (a) Simulated optical absorption for free sensitizers (b) Simulated absorption spectra for dyes adsorbed on  $Ti_{16}O_{32}$  cluster. The absorption spectra are simulated using PBE0 functional with 6-31G(d,p) basis set.



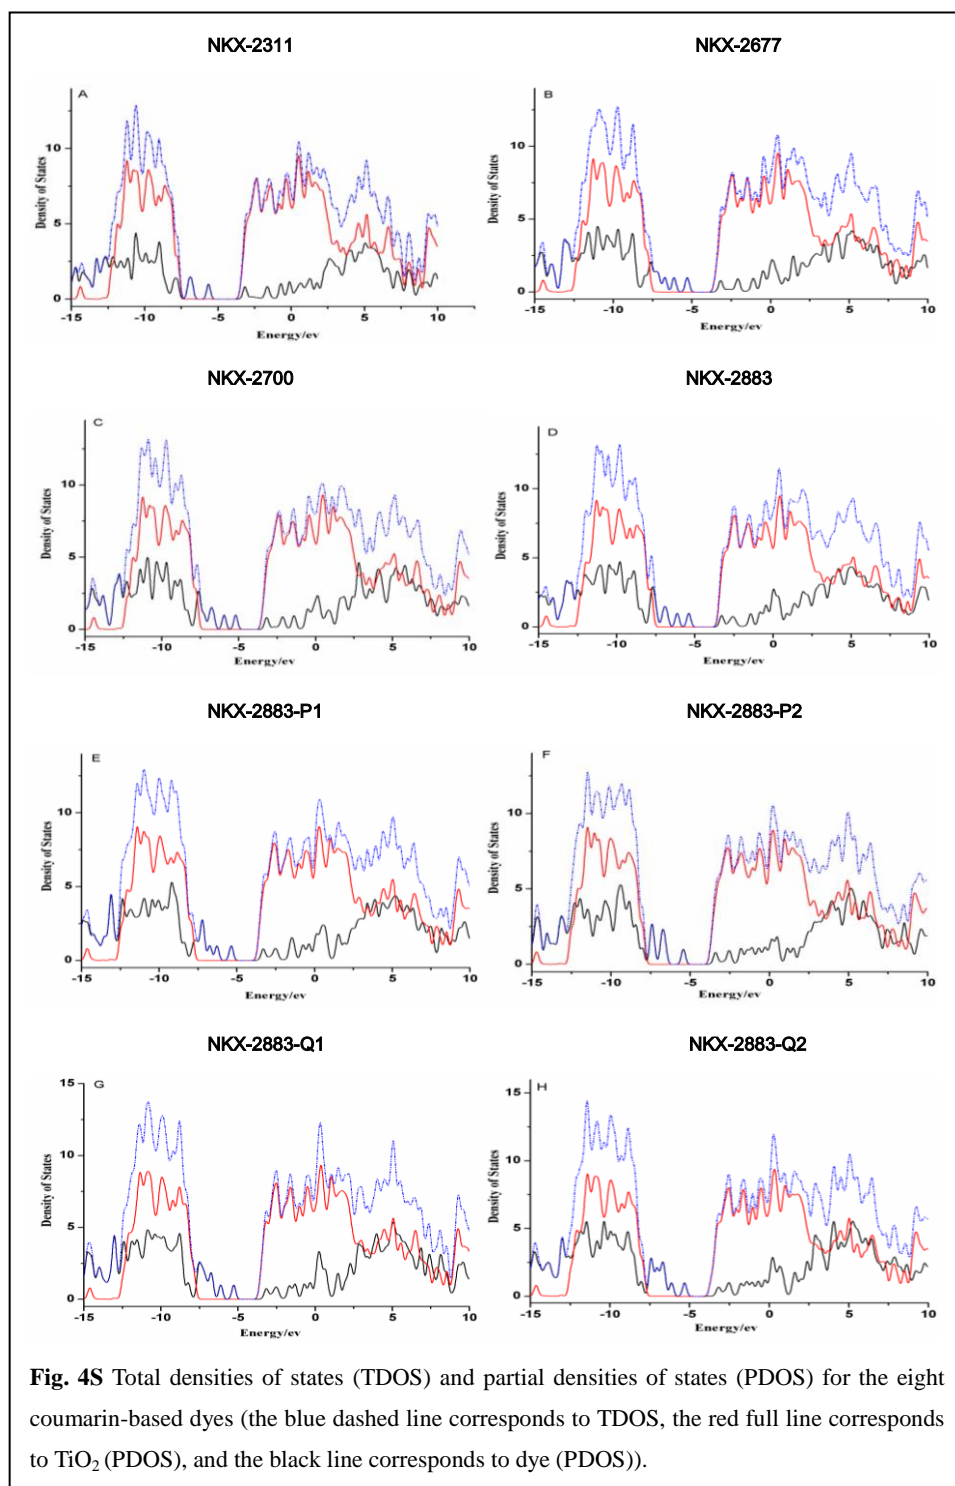

**Fig. 4S** Total densities of states (TDOS) and partial densities of states (PDOS) for the eight coumarin-based dyes (the blue dashed line corresponds to TDOS, the red full line corresponds to  $\text{TiO}_2$  (PDOS), and the black line corresponds to dye (PDOS)).

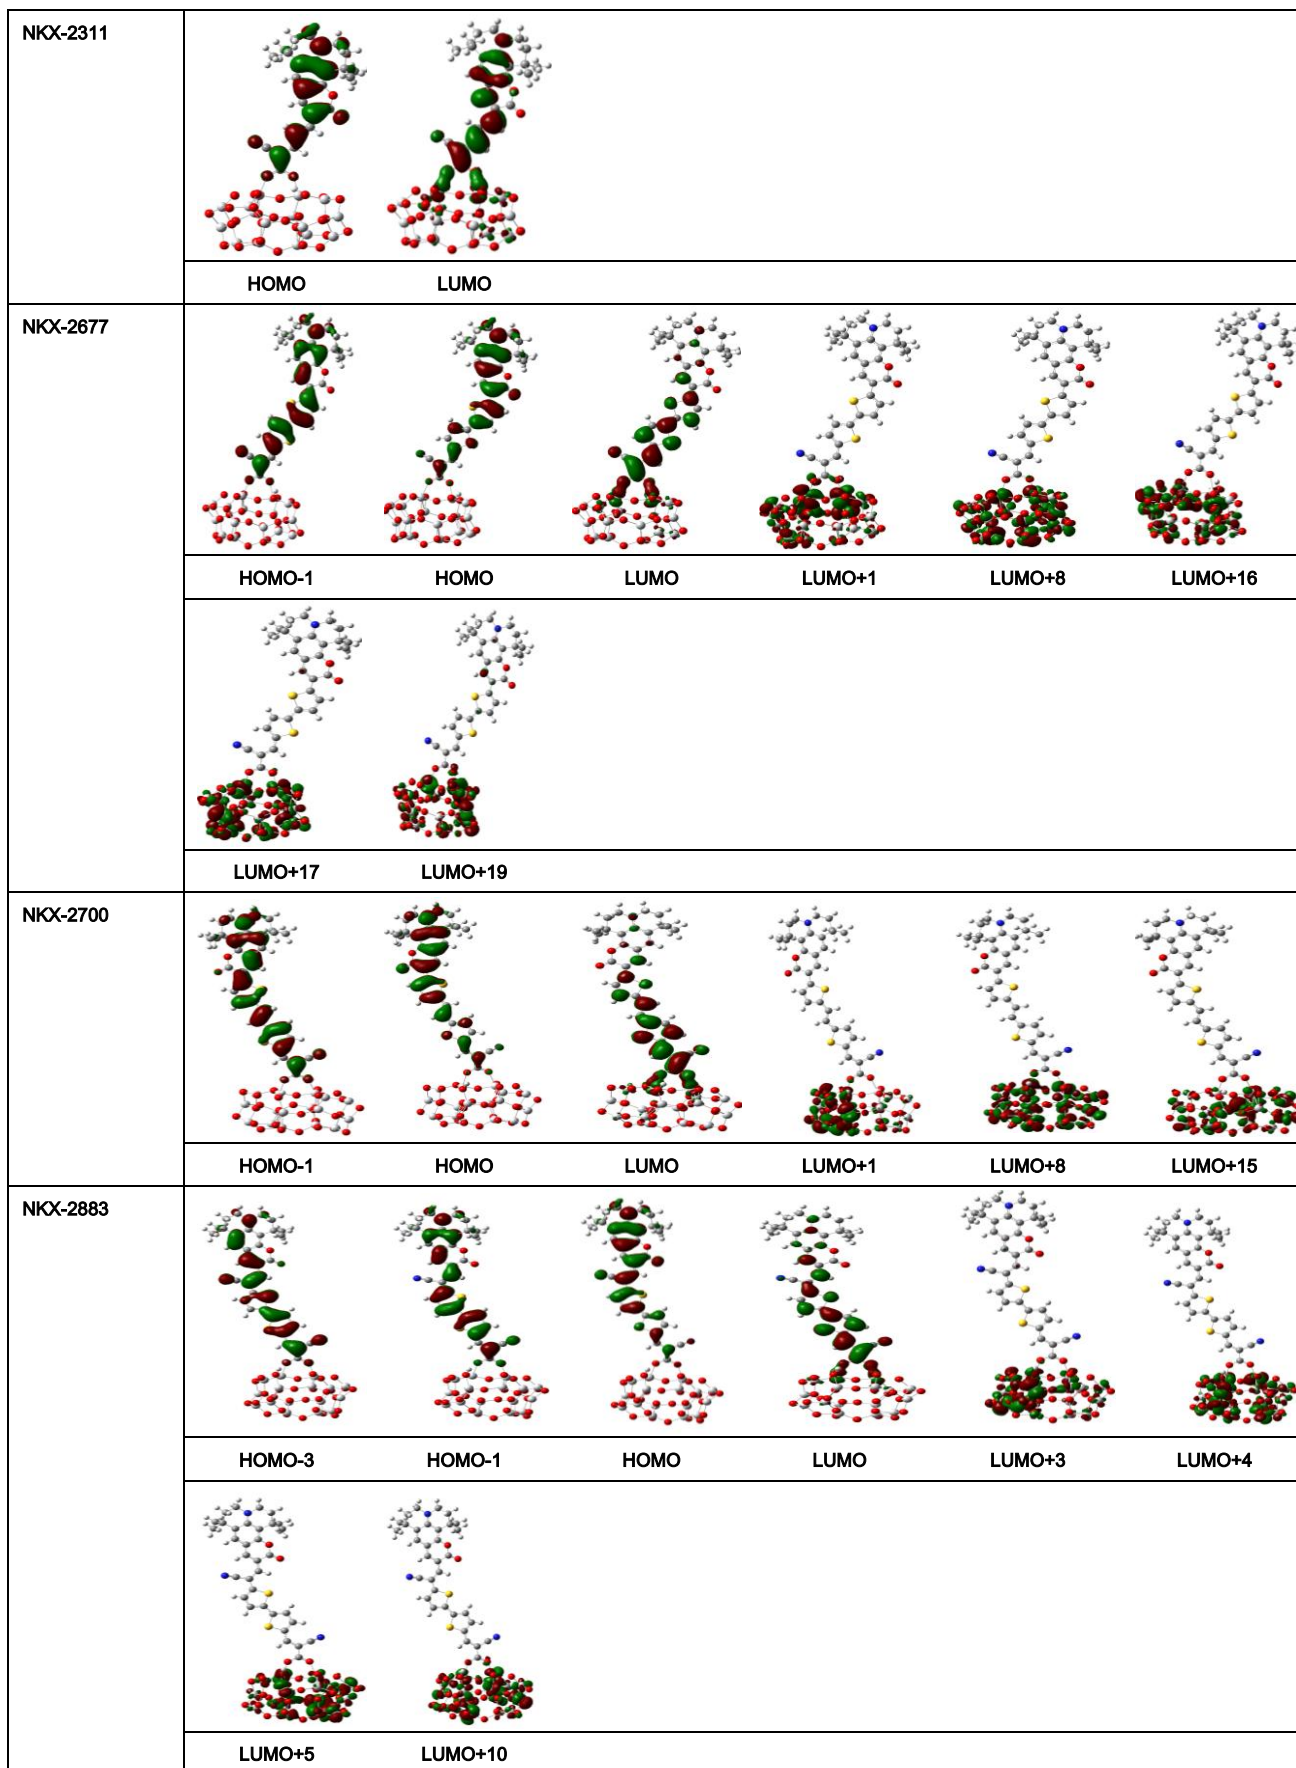

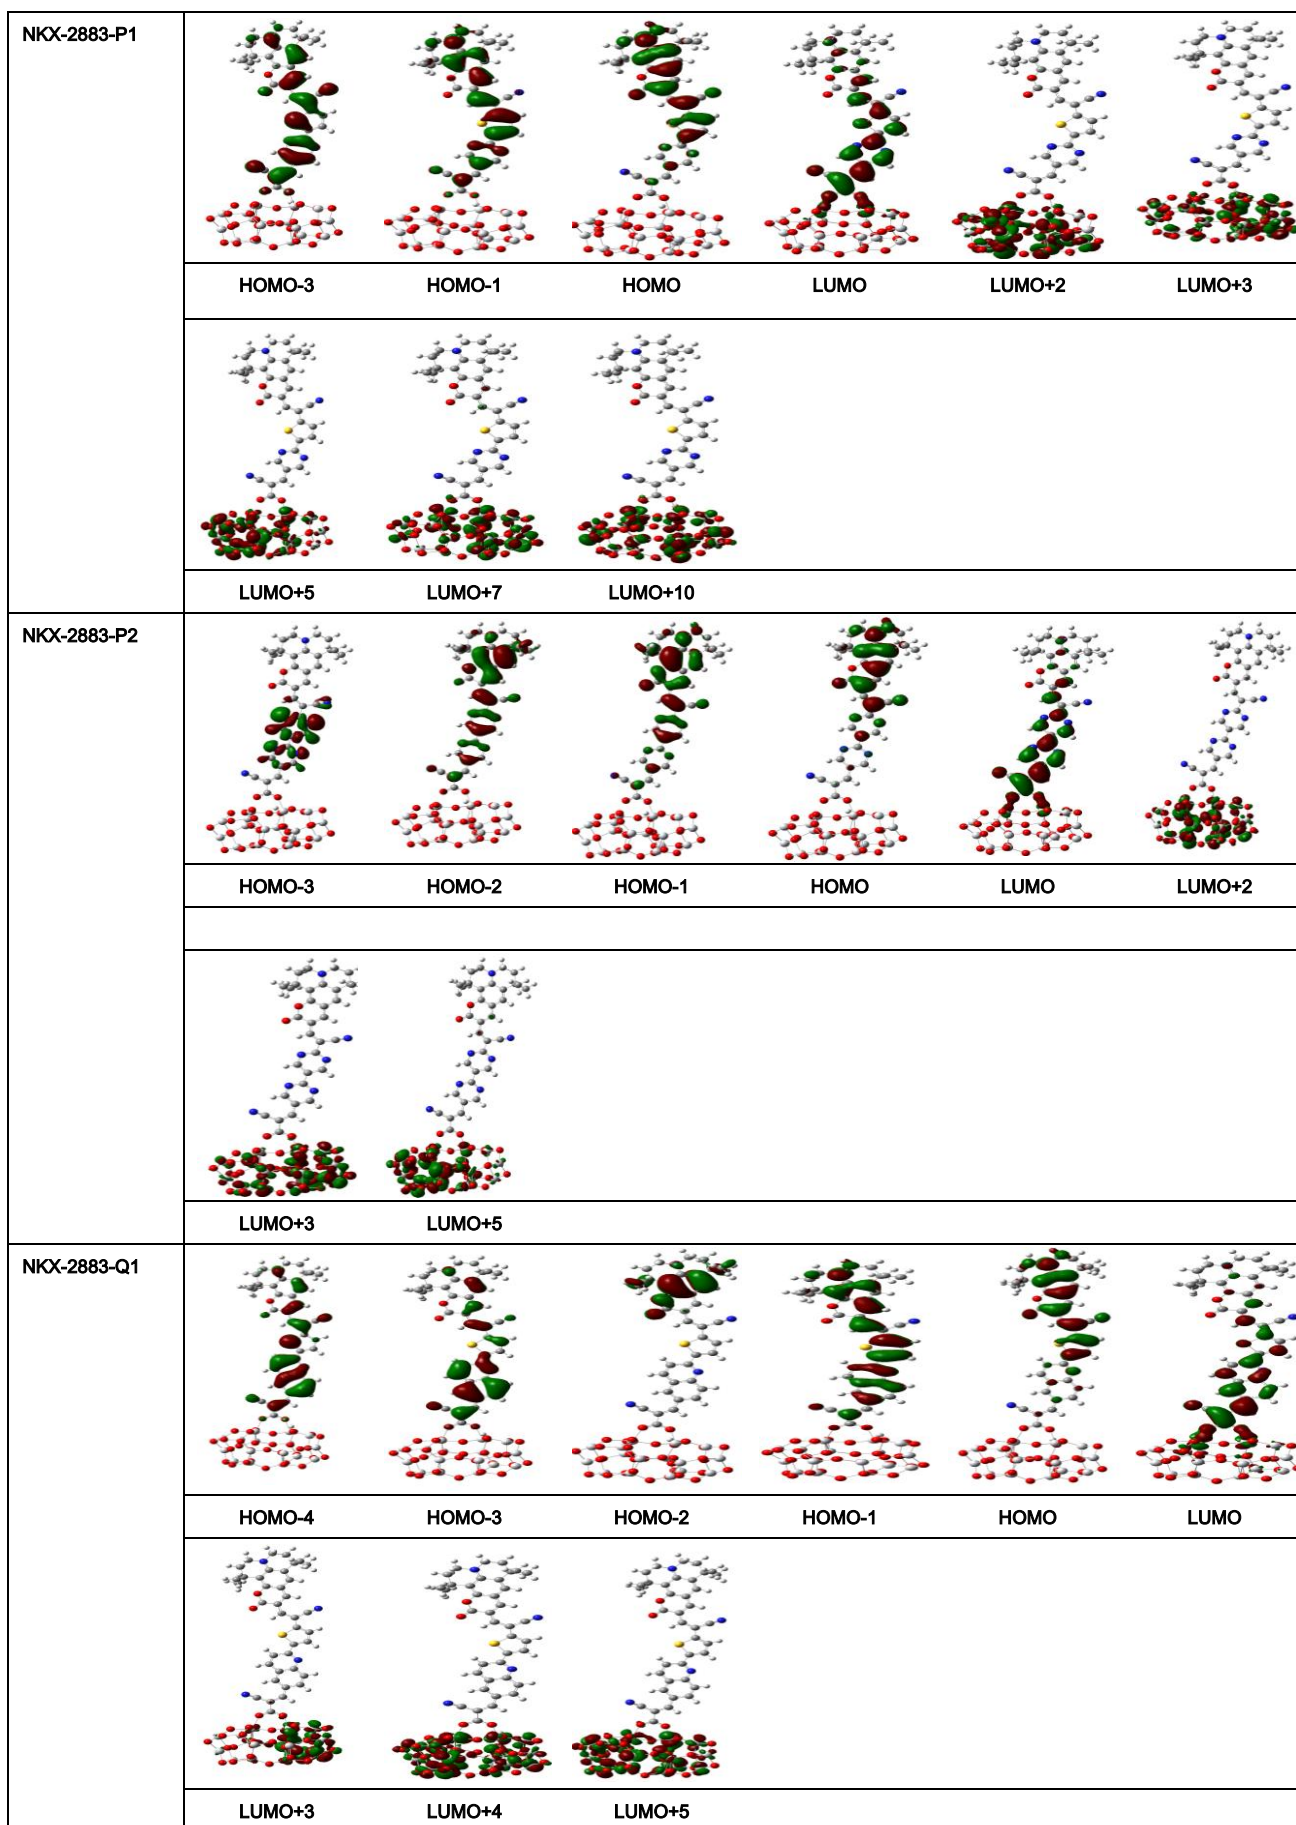

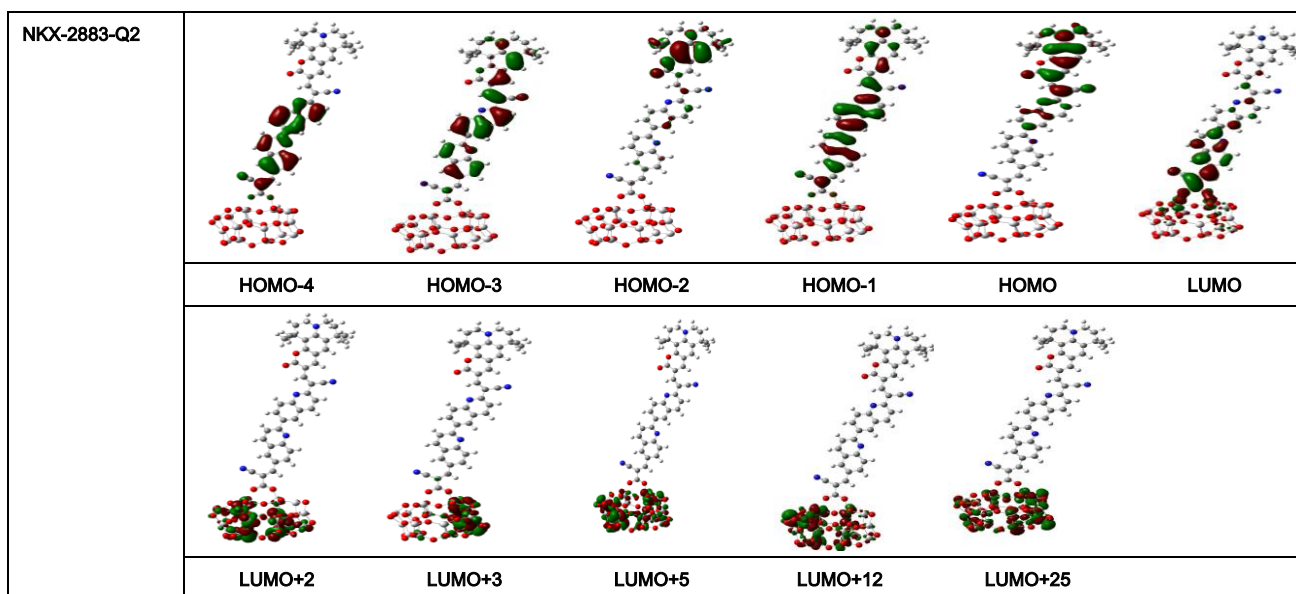

**Fig. 5S** Molecular orbitals relevant during photoexcitation for: 2311/TiO<sub>2</sub>, 2677/TiO<sub>2</sub>, 2700/TiO<sub>2</sub>, 2883/TiO<sub>2</sub>, 2883-P1/TiO<sub>2</sub>, 2883-P2/TiO<sub>2</sub>, 2883-Q1/TiO<sub>2</sub> and 2883-Q2/TiO<sub>2</sub> complexes (M062X )

|             |                                                                                     |                                                                                     |                                                                                     |                                                                                      |                                                                                       |                                                                                       |
|-------------|-------------------------------------------------------------------------------------|-------------------------------------------------------------------------------------|-------------------------------------------------------------------------------------|--------------------------------------------------------------------------------------|---------------------------------------------------------------------------------------|---------------------------------------------------------------------------------------|
| NKX-2311    |    |    |    |                                                                                      |                                                                                       |                                                                                       |
|             | HOMO                                                                                | LUMO                                                                                | LUMO+3                                                                              |                                                                                      |                                                                                       |                                                                                       |
| NKX-2677    |    |    |    |    |    |                                                                                       |
|             | HOMO-1                                                                              | HOMO                                                                                | LUMO                                                                                | LUMO+13                                                                              | LUMO+23                                                                               |                                                                                       |
| NKX-2700    |   |   |   |   |   |   |
|             | HOMO-1                                                                              | HOMO                                                                                | LUMO                                                                                | LUMO+8                                                                               | LUMO+9                                                                                | LUMO+11                                                                               |
| NKX-2883    |  |  |  |  |  |                                                                                       |
|             | HOMO-1                                                                              | HOMO                                                                                | LUMO                                                                                | LUMO+7                                                                               | LUMO+8                                                                                |                                                                                       |
| NKX-2883-P1 |  |  |  |  |  |  |
|             | HOMO-1                                                                              | HOMO                                                                                | LUMO                                                                                | LUMO+7                                                                               | LUMO+8                                                                                | LUMO+10                                                                               |
|             |  |  |  |  |                                                                                       |                                                                                       |
|             | LUMO+11                                                                             | LUMO+12                                                                             | LUMO+13                                                                             | LUMO+14                                                                              |                                                                                       |                                                                                       |

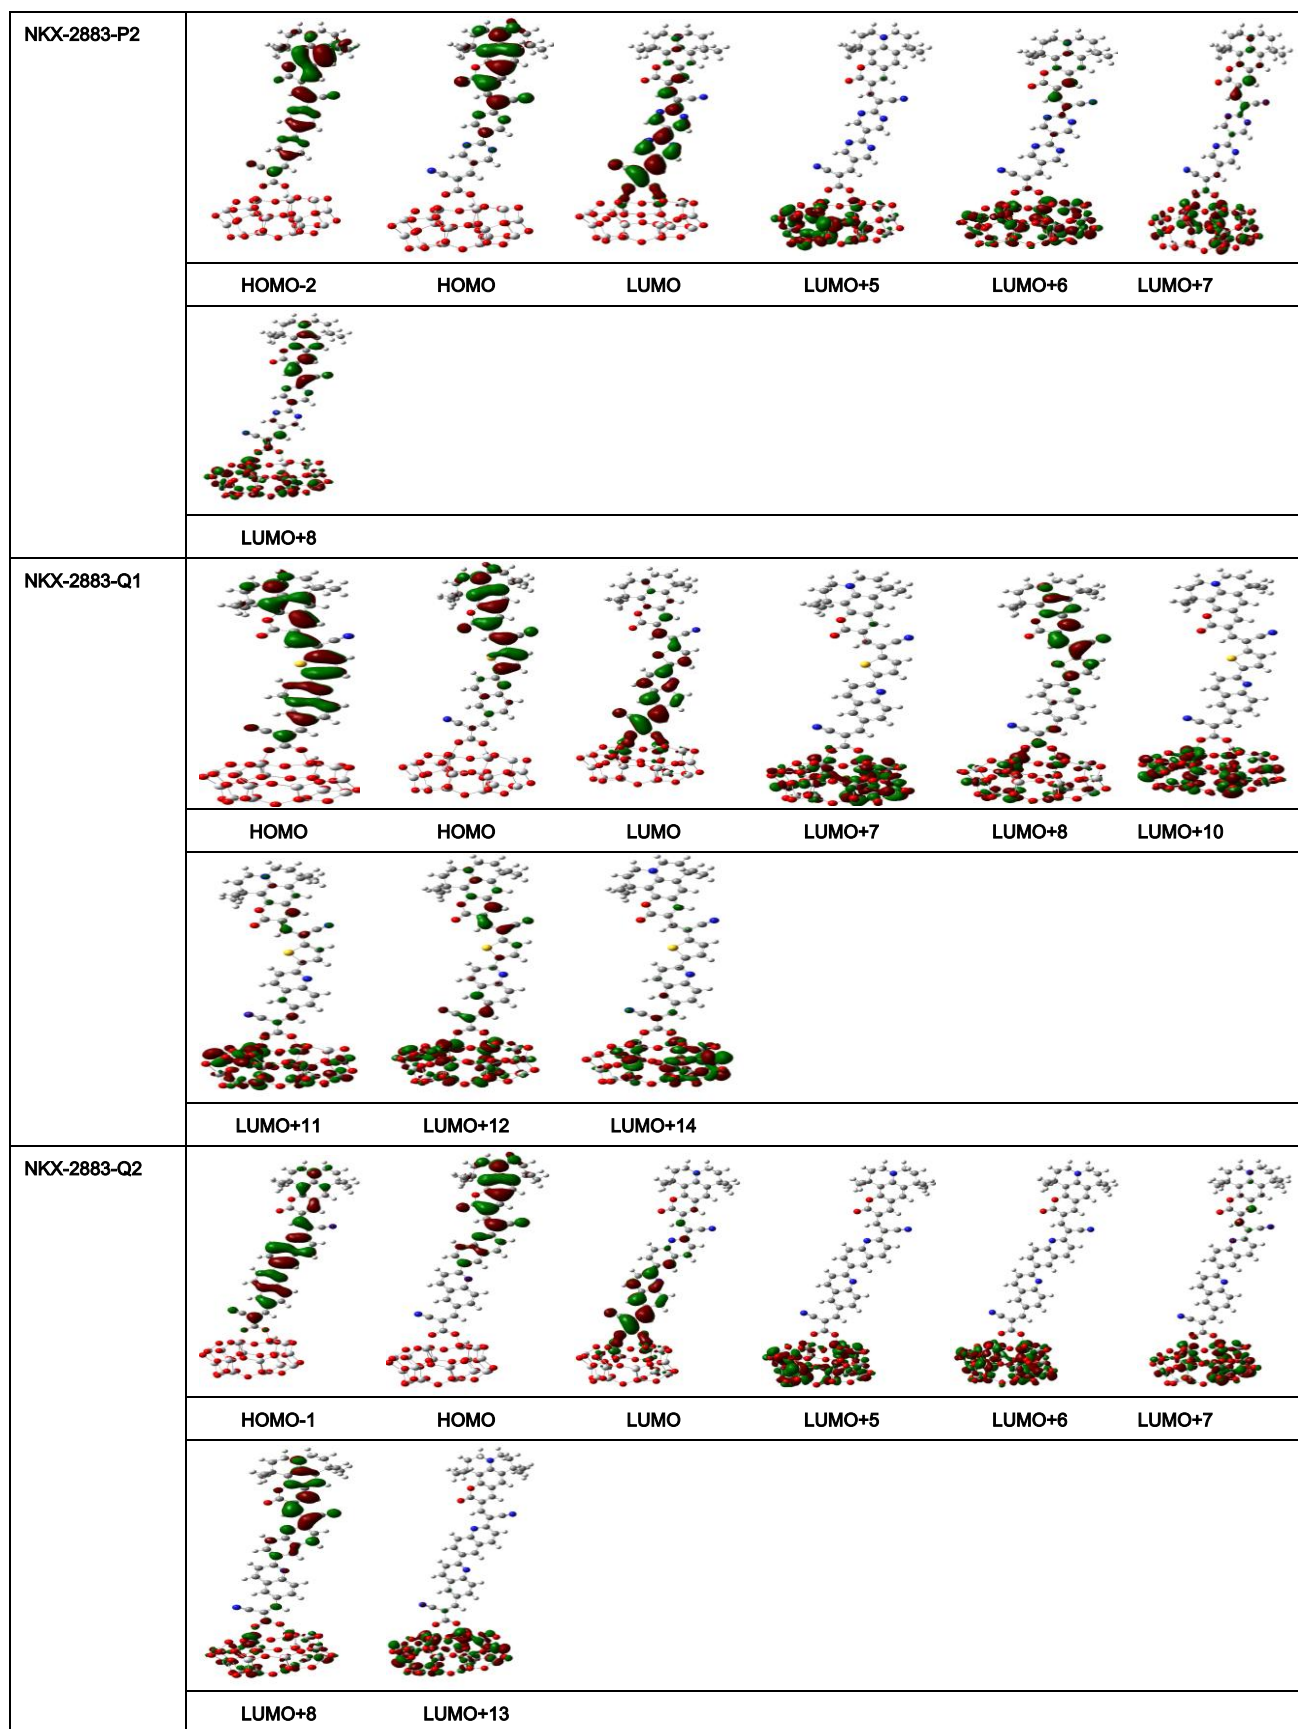

Fig. 6S Molecular orbitals relevant during photoexcitation for: 2311/TiO<sub>2</sub>, 2677/TiO<sub>2</sub>, 2700/TiO<sub>2</sub>, 2883/TiO<sub>2</sub>, 2883-P1/TiO<sub>2</sub>, 2883-P2/TiO<sub>2</sub>, 2883-Q1/TiO<sub>2</sub> and 2883-Q2/TiO<sub>2</sub>. ( B3LYP )

|          |        |         |      |        |        |        |
|----------|--------|---------|------|--------|--------|--------|
| NKX-2311 |        |         |      |        |        |        |
|          | HOMO   | LUMO    |      |        |        |        |
| NKX-2677 |        |         |      |        |        |        |
|          | HOMO-1 | HOMO    | LUMO | LUMO+7 | LUMO+8 |        |
| NKX-2700 |        |         |      |        |        |        |
|          | HOMO-1 | HOMO    | LUMO | LUMO+5 | LUMO+6 | LUMO+7 |
|          |        |         |      |        |        |        |
|          | LUMO+8 | LUMO+16 |      |        |        |        |
| NKX-2883 |        |         |      |        |        |        |
|          | HOMO-1 | HOMO    | LUMO | LUMO+2 | LUMO+3 | LUMO+5 |
|          |        |         |      |        |        |        |
|          | LUMO+6 | LUMO+7  |      |        |        |        |

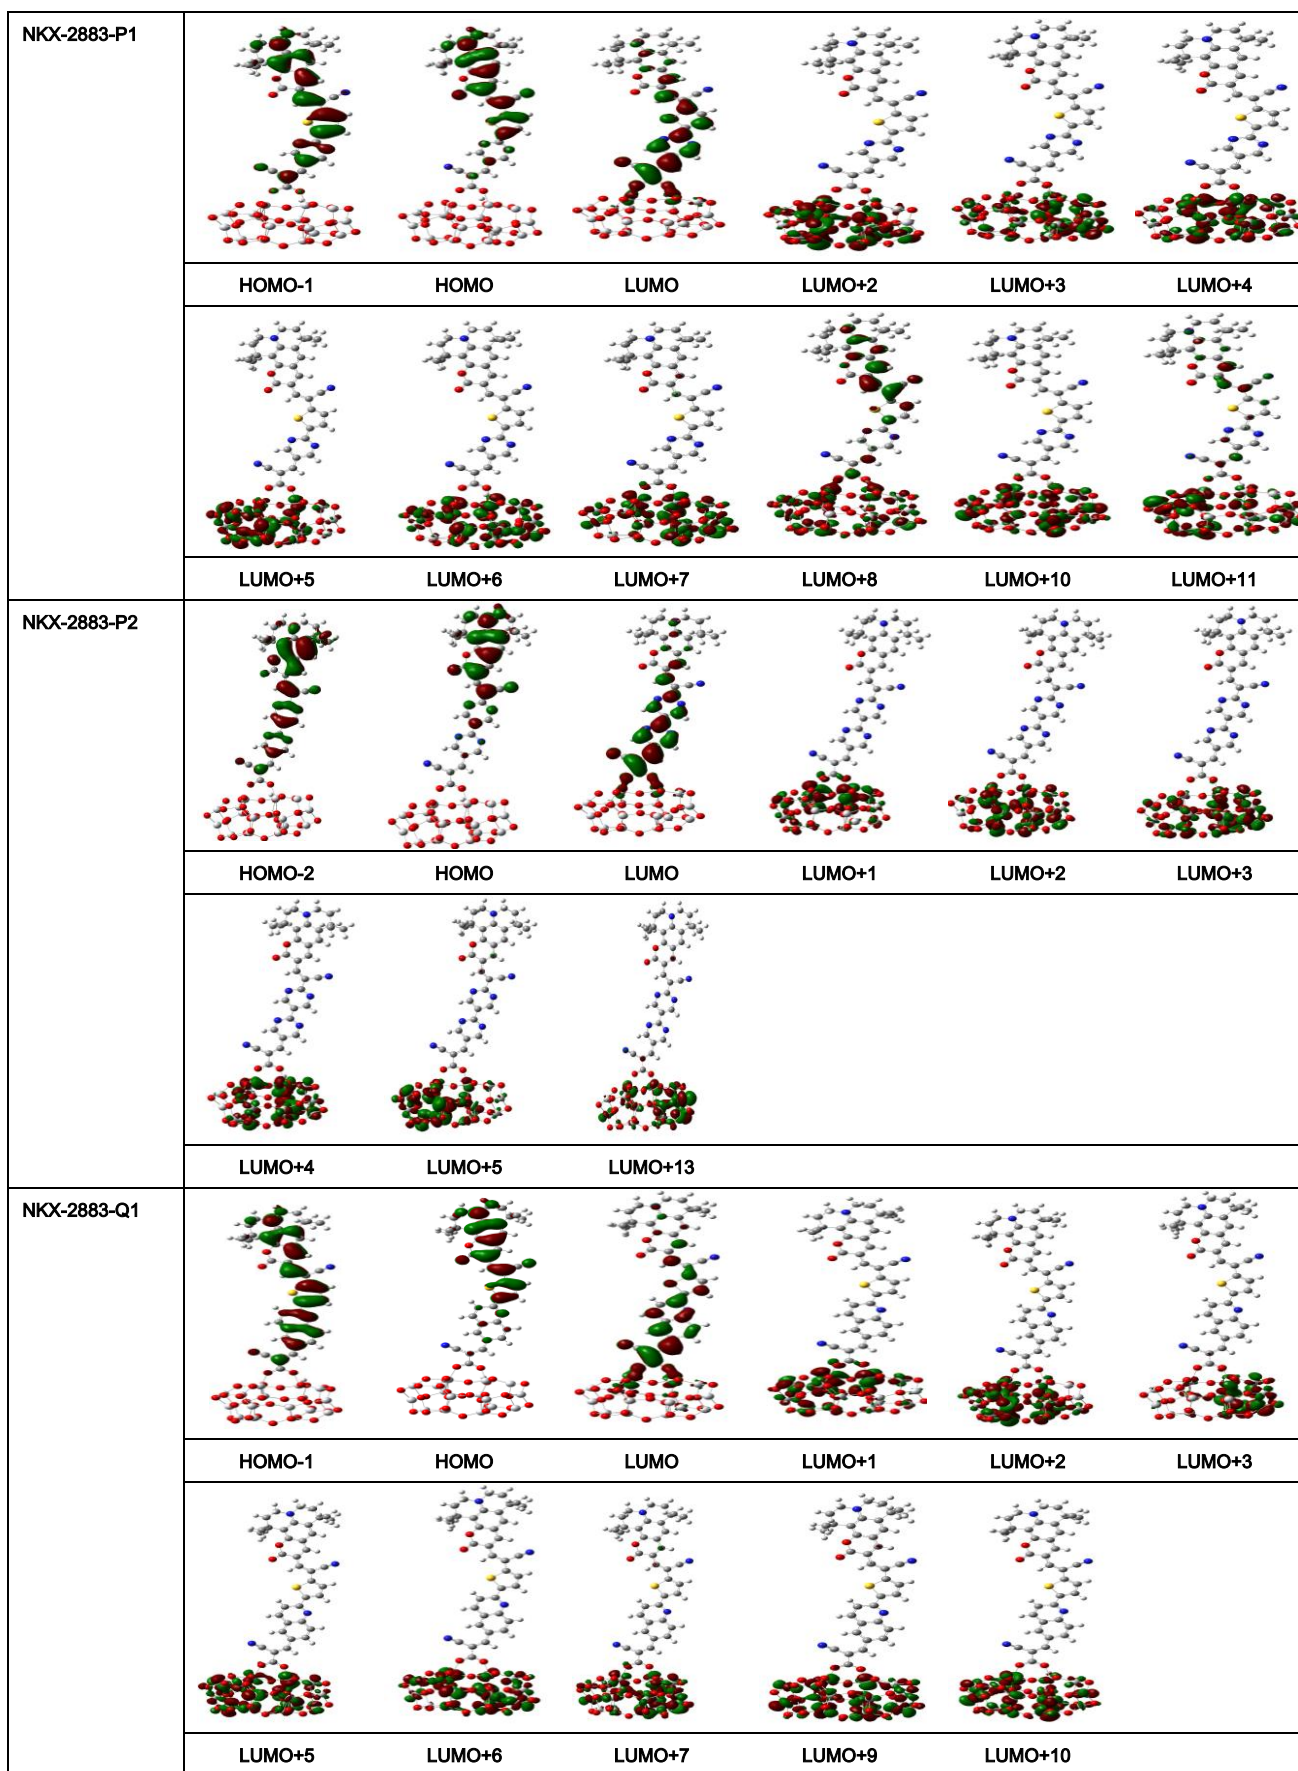



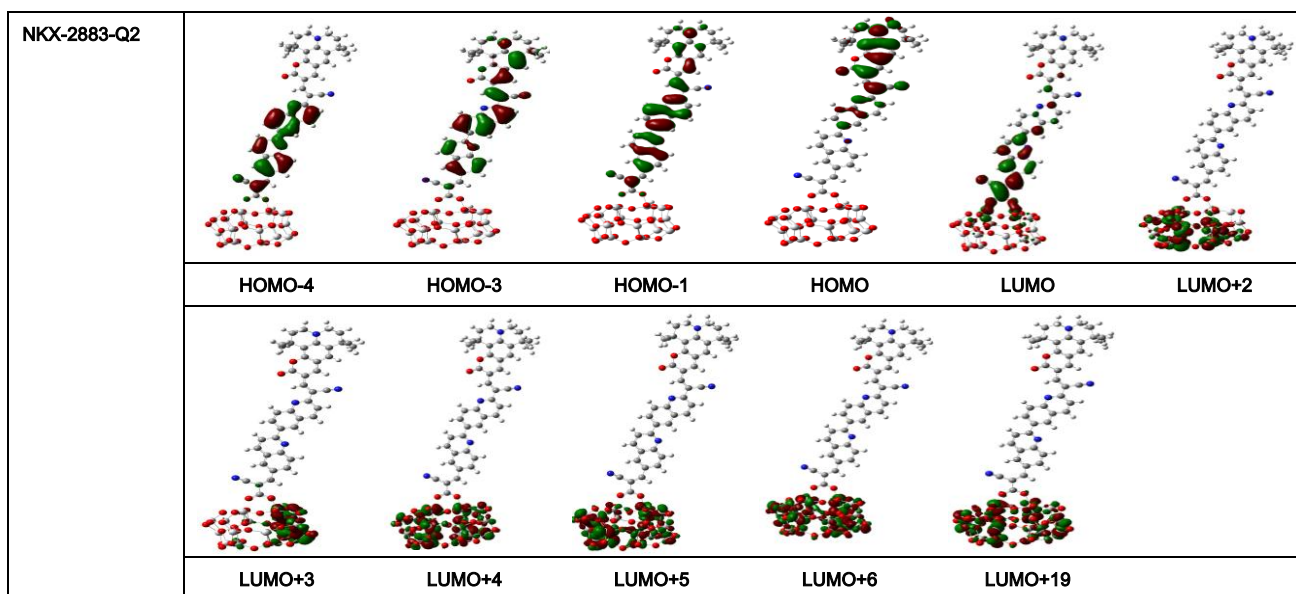

**Fig. 7S** Molecular orbitals relevant during photoexcitation for: 2311/TiO<sub>2</sub>, 2677/TiO<sub>2</sub>, 2700/TiO<sub>2</sub>, 2883/TiO<sub>2</sub>, 2883-P1/TiO<sub>2</sub>, 2883-P2/TiO<sub>2</sub>, 2883-Q1/TiO<sub>2</sub> and 2883-Q2/TiO<sub>2</sub> complexes. (PBE0 )

|             | HOMO                                                                                | HOMO-1                                                                              | LUMO                                                                                 | LUMO+1                                                                                |
|-------------|-------------------------------------------------------------------------------------|-------------------------------------------------------------------------------------|--------------------------------------------------------------------------------------|---------------------------------------------------------------------------------------|
| NKX-2311    | 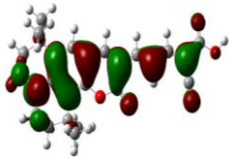   |    |    |    |
| NKX-2677    |    |    |    |    |
| NKX-2677-P1 |    |    |    |    |
| NKX-2677-P2 |    |    |    |    |
| NKX-2700    |  |  |  |  |
| NKX-2700-P1 |  |  |  |  |
| NKX-2700-P2 |  |  |  |  |
| NKX-2883    |  |  |  |  |
| NKX-2883-P1 |  |  |  |  |
| NKX-2883-P2 |  |  |  |  |

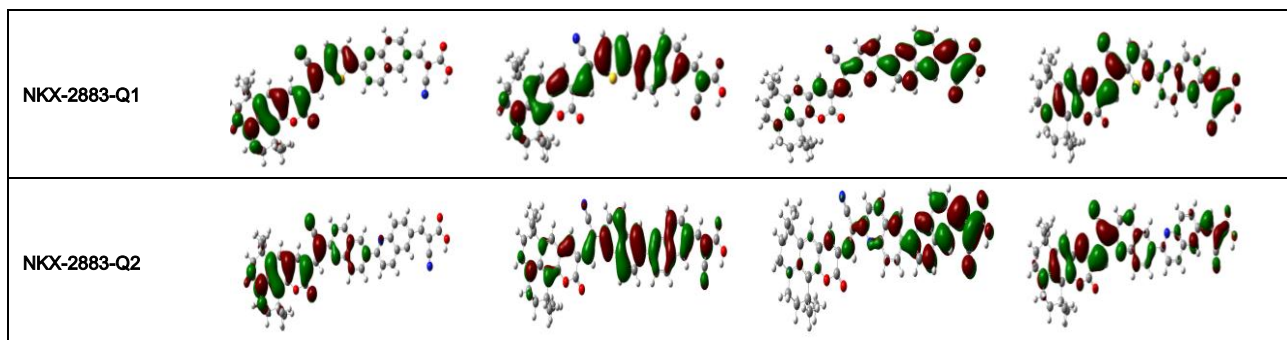

Fig. 8S Frontier molecular orbital spatial distribution for free dyes (B3LYP)

|             | HOMO | HOMO-1 | LUMO | LUMO+1 |
|-------------|------|--------|------|--------|
| NKX-2311    |      |        |      |        |
| NKX-2677    |      |        |      |        |
| NKX-2677-P1 |      |        |      |        |
| NKX-2677-P2 |      |        |      |        |
| NKX-2700    |      |        |      |        |
| NKX-2700-P1 |      |        |      |        |
| NKX-2700-P2 |      |        |      |        |
| NKX-2883    |      |        |      |        |
| NKX-2883-P1 |      |        |      |        |
| NKX-2883-P2 |      |        |      |        |

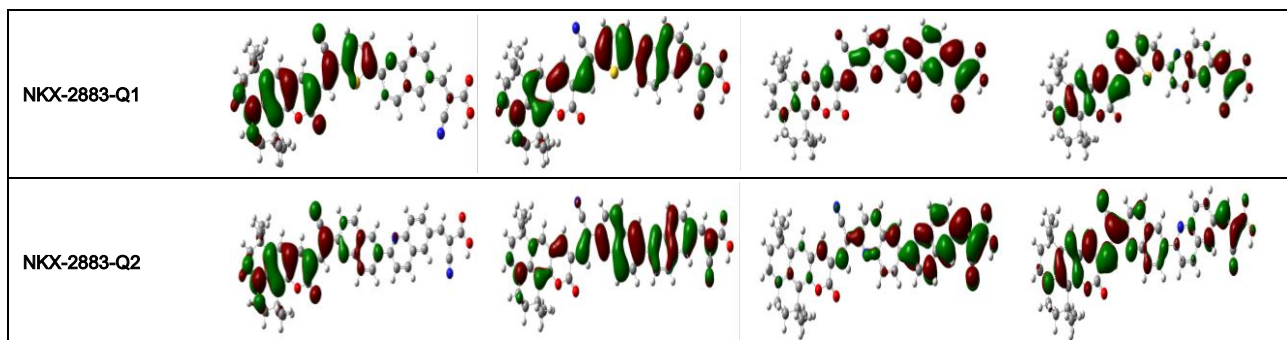

Fig. 9S Frontier molecular orbital spatial distribution for free dyes (PBE0)

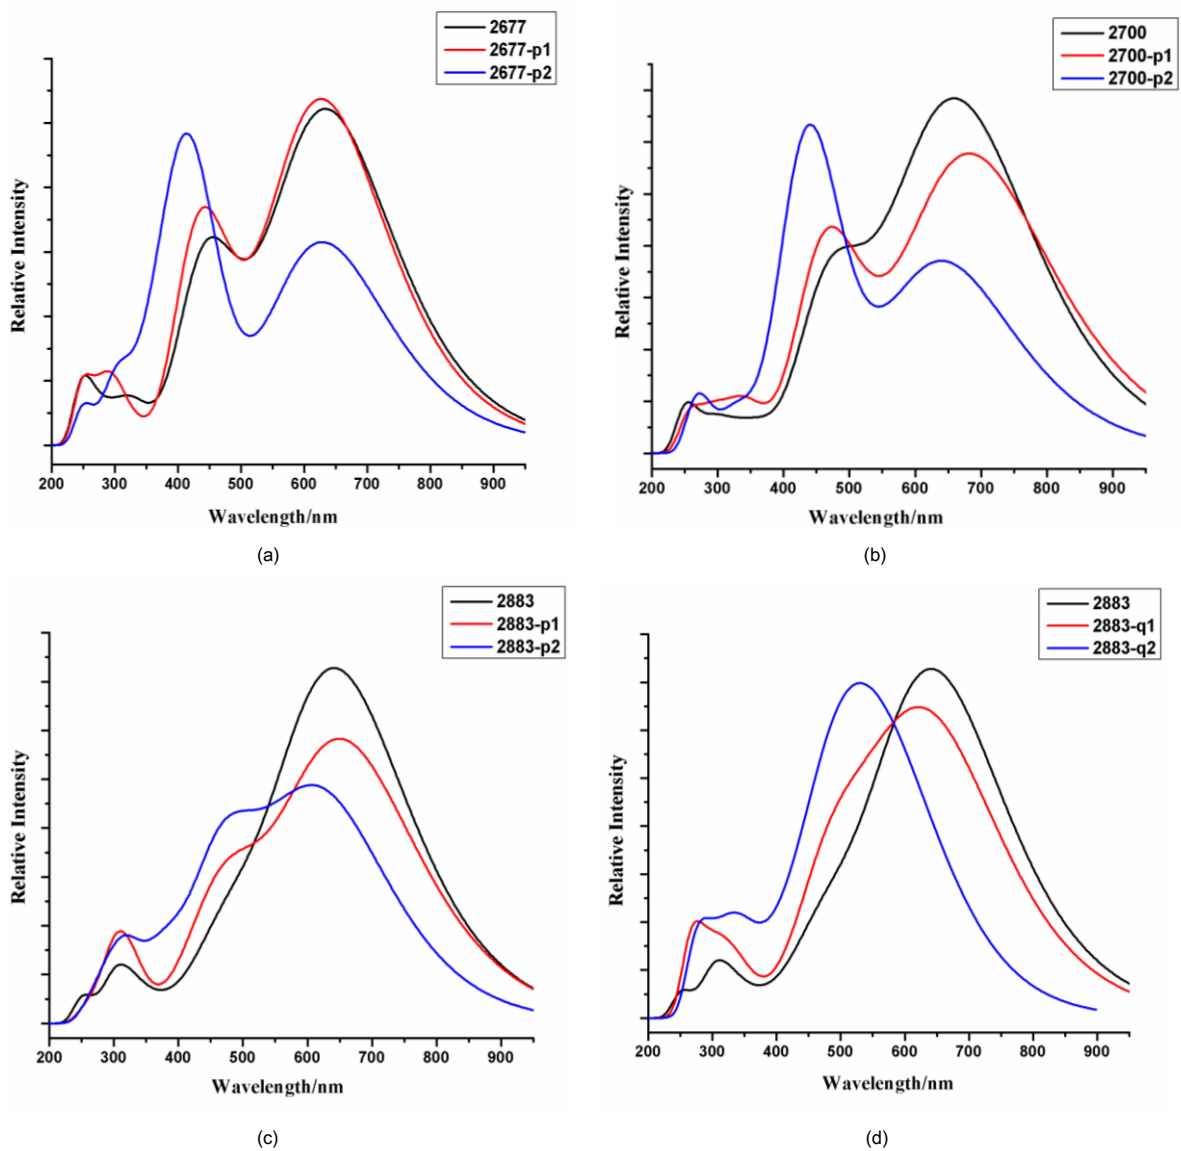

**Fig. 10S** Calculated UV/Vis absorption spectra four series sensitizers in ethanol solution obtained by B3LYP functional with 6-31G(d,p) basis set (a) NKX-2677, NKX-2677-P1 and NKX-2677-P2; (b) NKX-2700, NKX-2700-P1 and NKX-2700-P2; (c) NKX-2883, NKX-2883-P1 and NKX-2883-P2; (d) NKX-2883, NKX-2883-Q1 and NKX-2883-Q2

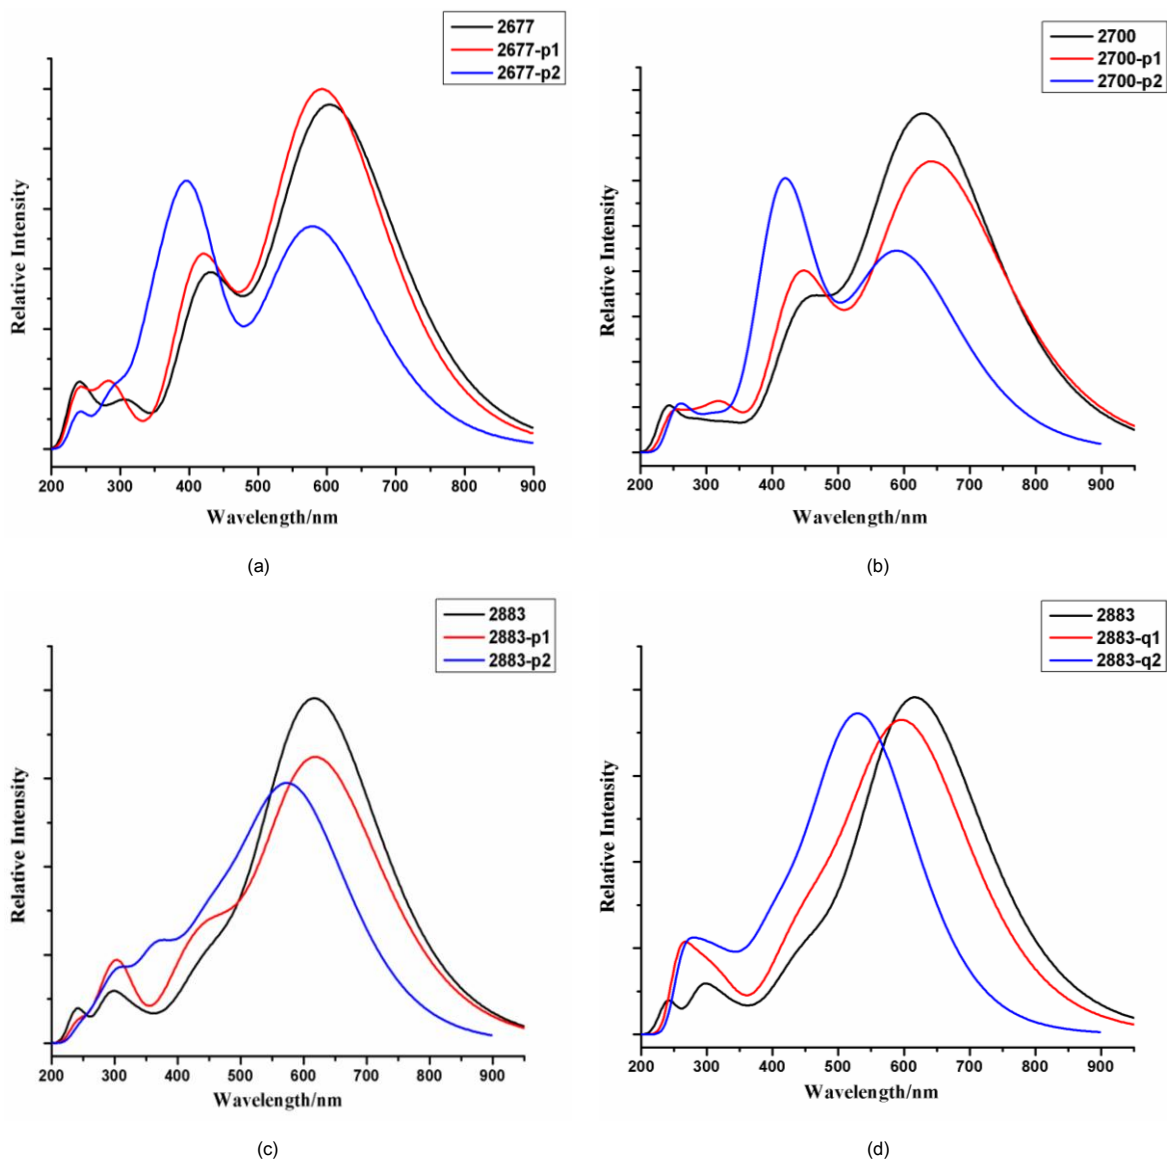

**Fig. 11S** Calculated UV/Vis absorption spectra four series sensitizers in ethanol solution obtained by B3LYP functional with 6-31G(d,p) basis set (a) NKX-2677, NKX-2677-P1 and NKX-2677-P2; (b) NKX-2700, NKX-2700-P1 and NKX-2700-P2; (c) NKX-2883, NKX-2883-P1 and NKX-2883-P2; (d) NKX-2883, NKX-2883-Q1 and NKX-2883-Q2

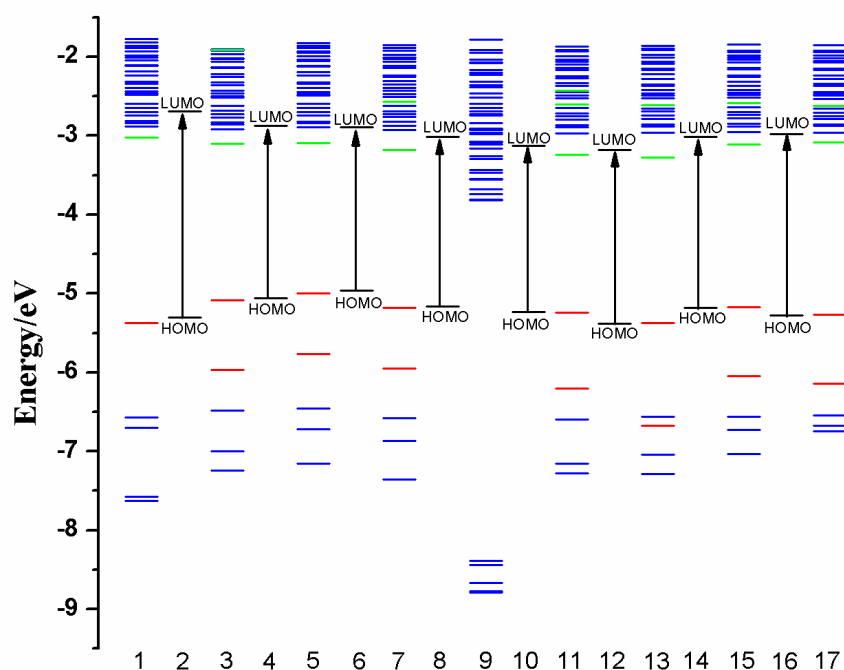

**Fig. 12S** Molecular orbital energy level (eV) diagram of (column 1) 2311/TiO<sub>2</sub> complex, (column 2) NKX-2311 dye, (column 3) 2677/TiO<sub>2</sub> complex, (column 4) NKX-2677 dye, (column 5) 2700/TiO<sub>2</sub> complex, (column 6) NKX-2700, (column 7) 2883/TiO<sub>2</sub> complex, (column 8) NKX-2883 dye, (column 9) isolated TiO<sub>2</sub>, (column 10) NKX-2883-P1 dye, (column 11) 2883-P1/TiO<sub>2</sub> complex, (column 12) NKX-2883-P2 dye, (column 13) 2883-P2/TiO<sub>2</sub> complex, (column 14) NKX-2883-Q1 dye, (column 15) NKX-2883-Q1/TiO<sub>2</sub> complex, (column 16) NKX-2883-Q2 dye, (column 17) 2883-Q2/TiO<sub>2</sub> complex in ethanol solution. Green represents localization of molecular orbital both on the dye and the surface. Blue represents localization of molecular orbital on TiO<sub>2</sub>. Red represents localization of molecular orbital on dyes (B3LYP)



**Table 1S** Transition energies (in eV) of  $S_0$ - $S_1$  transition for NKX-23111, NKX-2677, KNX-2700 and NKX-2883 coumarin dyes in ethanol solution with B3LYP/6-31g(d,p) geometries

| Method                    | 2311  | 2677  | 2700  | 2883  |         |
|---------------------------|-------|-------|-------|-------|---------|
| B3LYP                     | 2.468 | 1.946 | 1.864 | 1.909 | ethanol |
|                           | 2.479 | 1.966 | 1.879 | 1.922 | THF     |
| PBE0                      | 2.528 | 2.047 | 1.962 | 1.998 |         |
| CAM-B3LYP                 | 2.746 | 2.465 | 2.373 | 2.342 |         |
| LC-WPBE                   | 2.916 | 2.759 | 2.682 | 2.598 |         |
| M062X                     | 2.704 | 2.439 | 2.351 | 2.313 |         |
| WB97XD                    | 2.779 | 2.549 | 2.550 | 2.407 |         |
| Experimental <sup>a</sup> | 2.460 | 2.427 | 2.362 | 2.246 |         |

<sup>a</sup> Experimental value from Ref. 12, 22, 23,24

**Table 2S** The HOMO energy levels (in eV) and corresponding oxidized potential (vs NHE, in eV) of ground state ( $E_{\text{ox(dye)}}$ ) for NKX-2311, NKX-2677, NKX-2700, and NKX-2883. All values are calculated with B3LYP/6-31g(d,p) geometries

| Method                     | NKX-2311 |                      | NKX-2677 |                      | NKX-2700 |                      | NKX-2883 |                      |
|----------------------------|----------|----------------------|----------|----------------------|----------|----------------------|----------|----------------------|
|                            | HOMO     | $E_{\text{ox(dye)}}$ | HOMO     | $E_{\text{ox(dye)}}$ | HOMO     | $E_{\text{ox(dye)}}$ | HOMO     | $E_{\text{ox(dye)}}$ |
| B3LYP                      | 5.307    | 0.867                | 4.967    | 0.527                | 5.055    | 0.615                | 5.161    | 0.721                |
| PBE0                       | 5.529    | 1.089                | 5.277    | 0.837                | 5.188    | 0.748                | 5.386    | 0.946                |
| PBE0 <sup>a</sup>          | 5.571    | 1.131                | 5.340    | 0.900                | 5.250    | 0.810                | 5.462    | 1.022                |
| CAM-B3LYP                  | 6.436    | 1.996                | 6.232    | 1.792                | 6.145    | 1.705                | 6.306    | 1.866                |
| LC-WPBE                    | 7.586    | 3.146                | 7.455    | 3.015                | 6.145    | 1.705                | 7.508    | 3.068                |
| M062X                      | 6.398    | 1.958                | 6.195    | 1.755                | 6.115    | 1.675                | 6.268    | 1.828                |
| M062X <sup>a</sup>         | 6.444    | 2.004                | 6.194    | 1.754                | 6.091    | 1.651                | 6.300    | 1.860                |
| WB97XD                     | 7.003    | 2.563                | 6.813    | 2.373                | 6.740    | 2.300                | 6.879    | 2.439                |
| Experimental <sup>b]</sup> |          | 1.3                  |          | 0.91                 |          | 0.82                 |          | 0.97                 |

a HOMO are computed by single point calculation based on the B3LYP/6-31g(d, p) optimized geometries.

b Experimental value from Ref. 12, 22, 23,24

**Table 3S** Transition energies (in eV) of  $S_0$ - $S_1$  transition for dyes (NKX-23111, NKX-2677, KNX-2700 and NKX-2883) in ethanol solution. Geometries structures are optimized with different functionals.

| <b>Method</b>             | <b>2311</b> | <b>2677</b> | <b>2700</b> | <b>2883</b> |
|---------------------------|-------------|-------------|-------------|-------------|
| B3LYP                     | 2.468       | 1.946       | 1.864       | 1.909       |
| PBE0                      | 2.545       | 2.075       | 1.992       | 2.025       |
| CAM-B3LYP                 | 2.858       | 2.673       | 2.600       | 2.514       |
| LC-WPBE                   | 3.195       | 3.226       | 2.944       | 2.951       |
| M062X                     | 2.810       | 2.635       | 2.571       | 2.471       |
| WB97XD                    | 2.903       | 2.818       | 2.583       | 2.705       |
| Experimental <sup>a</sup> | 2.46        | 2.43        | 2.36        | 2.24        |

<sup>a</sup> Experimental value from Ref. 12, 22, 23,24

**Table 4S** Electronic transition data obtained by TD-M062X/6-31g(d,p) level for all free dyes and dye-titania complexes in ethanol solution with B3LYP/6-31g(d,p) geometries

| Transition energy (eV)                  | Wavelength/ nm | Oscillator strength / Light harvesting efficiency | Wavelength                                                                                                                |
|-----------------------------------------|----------------|---------------------------------------------------|---------------------------------------------------------------------------------------------------------------------------|
| <b>NKX-2311</b>                         |                |                                                   |                                                                                                                           |
| 2.704(S <sub>0</sub> →S <sub>1</sub> )  | 459            | 1.774/0.983                                       | HOMO->LUMO (95%)                                                                                                          |
| 4.393(S <sub>0</sub> →S <sub>4</sub> )  | 282            | 0.180/0.339                                       | H-2->LUMO (28%), H-1->LUMO (48%), HOMO->L+1 (19%)                                                                         |
| 4.832(S <sub>0</sub> →S <sub>5</sub> )  | 257            | 0.110/0.224                                       | HOMO->L+2 (79%), H-2->LUMO (6%)                                                                                           |
| 5.729(S <sub>0</sub> →S <sub>12</sub> ) | 216            | 0.147/0.287                                       | H-2->L+1 (75%), H-3->LUMO (8%)                                                                                            |
| 6.397(S <sub>0</sub> →S <sub>18</sub> ) | 194            | 0.314/0.517                                       | H-2->L+2 (56%), HOMO->L+6 (14%)                                                                                           |
| 6.483(S <sub>0</sub> →S <sub>19</sub> ) | 191            | 0.101/0.207                                       | H-10->LUMO (11%), H-8->LUMO (11%), H-1->L+2 (21%),<br>HOMO->L+6 (15%), H-11->LUMO (7%), H-3->L+1 (8%), H-2->L+2 (6%), H-1 |
| 6.580(S <sub>0</sub> →S <sub>20</sub> ) | 188            | 0.116/0.234                                       | H-1->L+4 (18%), HOMO->L+4 (63%)                                                                                           |
| 6.704(S <sub>0</sub> →S <sub>22</sub> ) | 185            | 0.139/0.274                                       | H-2->L+3 (38%), H-1->L+2 (25%), H-1->L+3 (17%), H-3->L+2 (5%)                                                             |
| 7.055(S <sub>0</sub> →S <sub>27</sub> ) | 176            | 0.102/0.209                                       | H-10->LUMO (14%), H-3->L+1 (60%)                                                                                          |
| <b>NKX-2311/TiO<sub>2</sub></b>         |                |                                                   |                                                                                                                           |
| 2.410(S <sub>0</sub> →S <sub>1</sub> )  | 514            | 2.025/0.991                                       | HOMO->LUMO (91%)                                                                                                          |
| <b>NKX-2677</b>                         |                |                                                   |                                                                                                                           |
| 2.439(S <sub>0</sub> →S <sub>1</sub> )  | 508            | 1.851/0.986                                       | HOMO->LUMO (82%), H-1->LUMO (9%), HOMO->L+1 (6%)                                                                          |
| 3.329(S <sub>0</sub> →S <sub>2</sub> )  | 372            | 0.177/0.334                                       | H-1->LUMO (33%), HOMO->L+1 (61%)                                                                                          |
| 3.640(S <sub>0</sub> →S <sub>3</sub> )  | 341            | 0.180/0.339                                       | H-1->LUMO (50%), HOMO->LUMO (14%), HOMO->L+1 (27%)                                                                        |
| 4.656(S <sub>0</sub> →S <sub>8</sub> )  | 266            | 0.132/0.262                                       | H-2->LUMO (10%), H-1->L+1 (19%), HOMO->L+2 (34%),<br>HOMO->L+3 (16%), H-3->LUMO (6%)                                      |
| 6.057(S <sub>0</sub> →S <sub>25</sub> ) | 205            | 0.112/0.227                                       | H-13->LUMO (13%), H-5->L+1 (32%), H-6->L+1 (9%), H-5->L+2 (6%),<br>H-3->L+2 (9%)                                          |
| 6.201(S <sub>0</sub> →S <sub>27</sub> ) | 200            | 0.213/0.388                                       | H-5->L+1 (10%), H-2->L+2 (14%), H-2->L+3 (29%), H-5->L+4 (5%)                                                             |
| 6.230(S <sub>0</sub> →S <sub>29</sub> ) | 199            | 0.320/0.521                                       | H-13->LUMO (14%), H-6->L+1 (10%), H-5->L+1 (17%), H-2->L+3 (17%),<br>H-5->L+2 (5%), H-2->L+2 (9%)                         |
| <b>NKX-2677-TiO<sub>2</sub></b>         |                |                                                   |                                                                                                                           |
| 2.300(S <sub>0</sub> →S <sub>1</sub> )  | 539            | 2.210/0.994                                       | H-1->LUMO (11%), HOMO->LUMO (78%)                                                                                         |
| 3.240(S <sub>0</sub> →S <sub>2</sub> )  | 383            | 0.114/0.231                                       | H-1->LUMO (36%), HOMO->L+16 (25%), HOMO->L+8 (5%),<br>HOMO->L+17 (6%), HOMO->L+19 (7%)                                    |
| 3.480(S <sub>0</sub> →S <sub>4</sub> )  | 356            | 0.231/0.413                                       | H-1->LUMO (34%), HOMO->LUMO (15%), HOMO->L+1 (11%),<br>HOMO->L+16 (11%)                                                   |
| <b>NKX-2677-P1</b>                      |                |                                                   |                                                                                                                           |
| 2.537(S <sub>0</sub> →S <sub>1</sub> )  | 489            | 2.067/0.991                                       | HOMO->LUMO (79%), HOMO->L+1 (11%), H-1->LUMO (7%)                                                                         |
| 3.819(S <sub>0</sub> →S <sub>3</sub> )  | 325            | 0.277/0.472                                       | H-1->LUMO (72%), HOMO->LUMO (12%), H-4->LUMO (5%),<br>HOMO->L+1 (5%)                                                      |
| 4.501(S <sub>0</sub> →S <sub>8</sub> )  | 275            | 0.104/0.213                                       | H-4->LUMO (14%), H-1->L+1 (28%), HOMO->L+3 (32%),<br>H-2->LUMO (5%), HOMO->L+2 (5%), HOMO->L+4 (7%)                       |
| 4.723(S <sub>0</sub> →S <sub>10</sub> ) | 263            | 0.134/0.265                                       | H-4->LUMO (12%), H-1->L+1 (30%), HOMO->L+3 (21%),<br>HOMO->L+4 (16%), H-2->LUMO (9%)                                      |
| 6.205(S <sub>0</sub> →S <sub>29</sub> ) | 200            | 0.175/0.332                                       | H-14->LUMO (20%), H-4->L+1 (11%), H-2->L+4 (12%),                                                                         |

|                                         |     |             |                                                                                                                    |
|-----------------------------------------|-----|-------------|--------------------------------------------------------------------------------------------------------------------|
|                                         |     |             | H-1->L+2 (12%),H-15->LUMO (5%), H-2->L+3 (5%), H-1->L+3 (6%)                                                       |
| 6.240(S <sub>0</sub> →S <sub>30</sub> ) | 199 | 0.557/0.723 | H-4->L+1 (10%), H-2->L+3 (19%), H-2->L+4 (43%)                                                                     |
| <b>NKX-2677-P2</b>                      |     |             |                                                                                                                    |
| 2.809(S <sub>0</sub> →S <sub>1</sub> )  | 441 | 1.789/0.984 | HOMO->LUMO (70%), HOMO->L+1 (21%),H-2->LUMO (5%)                                                                   |
| 4.011(S <sub>0</sub> →S <sub>5</sub> )  | 309 | 0.678/0.790 | H-4->LUMO (10%), H-2->LUMO (65%), H-1->LUMO (10%),<br>HOMO->LUMO(9%)                                               |
| 6.153(S <sub>0</sub> →S <sub>29</sub> ) | 202 | 0.446/0.642 | H-1->L+3 (35%), H-1->L+5 (41%)                                                                                     |
| <b>NKX-2700</b>                         |     |             |                                                                                                                    |
| 2.351(S <sub>0</sub> →S <sub>1</sub> )  | 527 | 2.350/0.996 | HOMO->LUMO (81%),H-1->LUMO (9%), HOMO->L+1 (6%)                                                                    |
| 3.208(S <sub>0</sub> →S <sub>2</sub> )  | 387 | 0.170/0.324 | H-1->LUMO (35%), HOMO->L+1 (56%)                                                                                   |
| 3.516(S <sub>0</sub> →S <sub>3</sub> )  | 353 | 0.202/0.372 | H-1->LUMO (46%), HOMO->LUMO (15%), HOMO->L+1 (29%)                                                                 |
| 5.847(S <sub>0</sub> →S <sub>23</sub> ) | 212 | 0.117/0.236 | H-8->LUMO (23%), H-6->L+1 (17%), H-5->L+1 (14%), H-3->L+2 (12%),<br>H-4->L+1 (5%)                                  |
| 6.143(S <sub>0</sub> →S <sub>28</sub> ) | 202 | 0.174/0.330 | H-3->L+2(10%), H-2->L+2(17%), H-2->L+3(23%),H-1->L+3(11%),<br>H-8->LUMO(6%), HOMO->L+5(6%), HOMO->L+10(5%)         |
| 6.200(S <sub>0</sub> →S <sub>30</sub> ) | 200 | 0.325/0.527 | H-2->L+2(10%), H-2->L+3(23%), H-1->L+3(23%),H-3->L+2(7%),<br>H-3->L+3(8%), HOMO->L+5(7%), HOMO->L+6(5%)            |
| <b>NKX-2700/TiO<sub>2</sub></b>         |     |             |                                                                                                                    |
| 2.218(S <sub>0</sub> →S <sub>1</sub> )  | 559 | 2.710/0.998 | H-1->LUMO (12%), HOMO->LUMO (77%)                                                                                  |
| 3.115(S <sub>0</sub> →S <sub>2</sub> )  | 398 | 0.115/0.233 | H-1->LUMO (41%), HOMO->L+15 (29%), HOMO->L+8 (5%)                                                                  |
| 3.369(S <sub>0</sub> →S <sub>3</sub> )  | 368 | 0.270/0.463 | H-1->LUMO (32%), HOMO->LUMO (18%), HOMO->L+15 (18%),<br>HOMO->L+1 (5%)                                             |
| <b>NKX-2700-P1</b>                      |     |             |                                                                                                                    |
| 2.403(S <sub>0</sub> →S <sub>1</sub> )  | 516 | 2.194/0.994 | HOMO->LUMO (78%), HOMO->L+1 (11%),H-1->LUMO (9%)                                                                   |
| 3.327(S <sub>0</sub> →S <sub>2</sub> )  | 373 | 0.166/0.318 | H-1->LUMO (18%), HOMO->L+1 (66%), HOMO->L+2 (8%)                                                                   |
| 3.594(S <sub>0</sub> →S <sub>3</sub> )  | 345 | 0.334/0.537 | H-1->LUMO (60%), HOMO->LUMO (17%), HOMO->L+1 (12%)                                                                 |
| 4.543(S <sub>0</sub> →S <sub>10</sub> ) | 273 | 0.132/0.259 | H-4->LUMO (38%), H-3->LUMO (13%), HOMO->L+2 (10%),<br>HOMO->L+3 (11%)                                              |
| 6.147(S <sub>0</sub> →S <sub>30</sub> ) | 202 | 0.373/0.576 | H-4->L+7 (15%), H-2->L+2 (27%), H-2->L+4 (36%), H-2->L+1 (7%)                                                      |
| <b>NKX-2700-P2</b>                      |     |             |                                                                                                                    |
| 2.749(S <sub>0</sub> →S <sub>1</sub> )  | 451 | 2.178/0.993 | H-1->LUMO (11%), HOMO->LUMO (64%), HOMO->L+1 (21%)                                                                 |
| 3.740(S <sub>0</sub> →S <sub>3</sub> )  | 331 | 0.578/0.736 | H-1->LUMO (53%), HOMO->LUMO (27%), HOMO->L+1 (9%)                                                                  |
| 4.747(S <sub>0</sub> →S <sub>11</sub> ) | 261 | 0.155/0.300 | H-4->LUMO (13%), H-2->LUMO (13%), H-6->LUMO (8%),<br>H-1->L+1 (13%),HOMO->L+3 (10%),HOMO->L+5 (21%), H-1->L+2 (5%) |
| <b>NKX-2883</b>                         |     |             |                                                                                                                    |
| 2.313(S <sub>0</sub> →S <sub>1</sub> )  | 536 | 2.255/0.994 | HOMO->LUMO (80%), H-1->LUMO (5%), HOMO->L+1 (9%)                                                                   |
| 3.053(S <sub>0</sub> →S <sub>2</sub> )  | 406 | 0.144/0.282 | H-1->LUMO (32%), HOMO->L+1 (60%)                                                                                   |
| 3.976(S <sub>0</sub> →S <sub>5</sub> )  | 312 | 0.105/0.215 | H-2->LUMO (31%), H-2->L+1 (17%), H-1->L+1 (33%)                                                                    |
| 4.715(S <sub>0</sub> →S <sub>10</sub> ) | 263 | 0.194/0.360 | H-5->LUMO (13%), HOMO->L+3 (31%), HOMO->L+4 (18%),<br>H-1->L+2 (9%), H-1->L+4 (5%)                                 |
| 6.040(S <sub>0</sub> →S <sub>29</sub> ) | 205 | 0.337/0.540 | H-2->L+2(40%),H-2->L+3(29%), H-2->L+1 (7%), HOMO->L+8 (5%)                                                         |
| <b>NKX-2883/TiO<sub>2</sub></b>         |     |             |                                                                                                                    |
| 2.230(S <sub>0</sub> →S <sub>1</sub> )  | 556 | 2.627/0.998 | HOMO->LUMO (74%), H-1->LUMO (8%), HOMO->L+3 (5%)                                                                   |

|                                    |     |             |                                                                                                                       |
|------------------------------------|-----|-------------|-----------------------------------------------------------------------------------------------------------------------|
| 2.951( $S_0 \rightarrow S_2$ )     | 420 | 0.103/0.211 | H-1->LUMO (29%), HOMO->L+3 (17%), HOMO->L+5 (20%),<br>HOMO->L+4 (5%), HOMO->L+7 (7%), HOMO->L+10 (7%)                 |
| 3.383( $S_0 \rightarrow S_3$ )     | 366 | 0.174/0.330 | H-1->LUMO (51%), HOMO->LUMO (18%), HOMO->L+3 (6%),<br>HOMO->L+5 (6%)                                                  |
| 3.897( $S_0 \rightarrow S_8$ )     | 318 | 0.102/0.209 | H-3->LUMO (11%), H-1->L+3 (11%), H-1->L+5 (21%),<br>HOMO->L+5 (10%), H-1->L+7 (6%), HOMO->L+3 (6%)                    |
| <b>NKX-2883-P1</b>                 |     |             |                                                                                                                       |
| 2.356( $S_0 \rightarrow S_1$ )     | 526 | 2.001/0.990 | HOMO->LUMO(76%),HOMO->L+1(16%),H-1->LUMO (5%                                                                          |
| 3.212( $S_0 \rightarrow S_2$ )     | 386 | 0.203/0.373 | H-1->LUMO (16%), HOMO->L+1(68%), HOMO->LUMO (7%)                                                                      |
| 3.629( $S_0 \rightarrow S_3$ )     | 342 | 0.206/0.378 | H-1->LUMO (68%), HOMO->LUMO (12%), HOMO->L+1(9%)                                                                      |
| 4.156( $S_0 \rightarrow S_6$ )     | 298 | 0.295/0.493 | H-3->LUMO (21%), H-1->L+1(46%), HOMO->L+2(16%)                                                                        |
| <b>NKX-2883-P1/TiO<sub>2</sub></b> |     |             |                                                                                                                       |
| 2.322( $S_0 \rightarrow S_1$ )     | 534 | 2.237/0.994 | HOMO->LUMO (70%), H-1->LUMO (6%), HOMO->L+3(6%),<br>HOMO->L+5(8%)                                                     |
| 3.131( $S_0 \rightarrow S_2$ )     | 396 | 0.226/0.406 | H-1->LUMO (14%), HOMO->LUMO (10%), HOMO->L+3(15%),<br>HOMO->L+5(26%), HOMO->L+2(5%), HOMO->L+7(6%),<br>HOMO->L+10(7%) |
| 3.545( $S_0 \rightarrow S_3$ )     | 350 | 0.341/0.544 | H-1->LUMO (64%), HOMO->LUMO (16%), H-3->LUMO (5%)                                                                     |
| 4.077( $S_0 \rightarrow S_{10}$ )  | 304 | 0.105/0.215 | HOMO->L+5 (31%), HOMO->L+7 (25%),H-3->LUMO (6%),<br>H-1->L+5 (8%)                                                     |
| 4.101( $S_0 \rightarrow S_{11}$ )  | 302 | 0.161/0.310 | H-3->LUMO (11%), H-1->L+5(10%), HOMO->L+7(35%),<br>H-1->L+3(7%), H-1->L+7(5%)                                         |
| <b>NKX-2883-P2</b>                 |     |             |                                                                                                                       |
| 2.530( $S_0 \rightarrow S_1$ )     | 490 | 2.024/0.991 | HOMO->LUMO (63%), HOMO->L+1 (30%)                                                                                     |
| 3.894( $S_0 \rightarrow S_4$ )     | 318 | 0.242/0.427 | H-2->L+1(19%), H-1-> LUMO (53%),H-3->LUMO (5%), H-1->L+1 (7%),<br>HOMO->LUMO (5%)                                     |
| 3.933( $S_0 \rightarrow S_5$ )     | 315 | 0.376/0.579 | H-2->LUMO (44%), H-2->L+1 (18%), H-1->LUMO (11%),<br>H-3->LUMO (5%), HOMO->LUMO (6%)                                  |
| 4.339( $S_0 \rightarrow S_7$ )     | 286 | 0.240/0.425 | H-3->LUMO (21%), H-1->L+1 (25%), HOMO->L+3 (31%),<br>HOMO->L+5 (9%)                                                   |
| <b>NKX-2883-P2/TiO<sub>2</sub></b> |     |             |                                                                                                                       |
| 2.514( $S_0 \rightarrow S_1$ )     | 493 | 2.218/0.994 | HOMO->LUMO (56%), HOMO->L+3 (17%), HOMO->L+2 (9%),<br>HOMO->L+5 (8%)                                                  |
| 3.819( $S_0 \rightarrow S_4$ )     | 325 | 0.793/0.839 | H-3->LUMO (14%), H-1->LUMO (52%), HOMO->LUMO (12%),<br>H-2->LUMO (7%)                                                 |
| <b>NKX-2883-Q1</b>                 |     |             |                                                                                                                       |
| 2.432( $S_0 \rightarrow S_1$ )     | 510 | 2.270/0.995 | HOMO->LUMO (64%), HOMO->L+1 (27%)                                                                                     |
| 3.177( $S_0 \rightarrow S_2$ )     | 390 | 0.199/0.368 | H-1->LUMO (24%), HOMO->LUMO (11%), HOMO->L+1 (53%)                                                                    |
| 3.623( $S_0 \rightarrow S_3$ )     | 342 | 0.227/0.407 | H-1->LUMO (54%), HOMO->LUMO (17%), HOMO->L+1 (11%),<br>H-3->LUMO (5%)                                                 |
| 4.019( $S_0 \rightarrow S_6$ )     | 308 | 0.171/0.325 | H-4->LUMO (24%),H-1->L+1(42%),H-2->LUMO (6%),<br>HOMO->L+3 (9%)                                                       |
| 4.718( $S_0 \rightarrow S_{12}$ )  | 262 | 0.220/0.397 | H-1->L+3 (10%), HOMO->L+4 (24%), HOMO->L+5 (21%),                                                                     |

|                                         |     |             |                                                                                                                             |
|-----------------------------------------|-----|-------------|-----------------------------------------------------------------------------------------------------------------------------|
|                                         |     |             | H-5->LUMO (7%), H-3->L+1 (5%), HOMO->L+3 (8%)                                                                               |
| 5.049(S <sub>0</sub> →S <sub>15</sub> ) | 246 | 0.295/0.493 | H-3->L+2 (27%), HOMO->L+5 (17%), HOMO->L+4 (6%)                                                                             |
| 5.388(S <sub>0</sub> →S <sub>22</sub> ) | 230 | 0.133/0.264 | H-5->L+1(33%), H-1->L+2(12%), H-5->LUMO (6%), H-4->L+1 (6%),<br>H-4->L+2 (6%), H-3->L+2 (8%)                                |
| <b>NKX-2883-Q1/TiO<sub>2</sub></b>      |     |             |                                                                                                                             |
| 2.4194(S <sub>0</sub> →S <sub>1</sub> ) | 512 | 2.510/0.997 | HOMO->LUMO (56%), HOMO->L+3 (11%), HOMO->L+5 (11%),<br>H-1->LUMO (5%)                                                       |
| 3.1208(S <sub>0</sub> →S <sub>2</sub> ) | 397 | 0.270/0.463 | H-1->LUMO (23%), HOMO->LUMO (15%), HOMO->L+3 (12%),<br>HOMO->L+5(19%), HOMO->L+4 (6%)                                       |
| 3.564(S <sub>0</sub> →S <sub>3</sub> )  | 348 | 0.364/0.567 | H-1->LUMO (47%), HOMO->LUMO (23%), H-3->LUMO (7%)                                                                           |
| 3.989(S <sub>0</sub> →S <sub>9</sub> )  | 311 | 0.124/0.248 | H-4->LUMO (13%), H-2->LUMO (15%), H-1->L+5 (10%),<br>H-2->L+3 (7%), H-2->L+5 (9%), H-1->L+3 (7%)                            |
| <b>NKX-2883-Q2</b>                      |     |             |                                                                                                                             |
| 2.602(S <sub>0</sub> →S <sub>1</sub> )  | 476 | 2.117/0.992 | HOMO->LUMO (37%), HOMO->L+1 (55%)                                                                                           |
| 3.359(S <sub>0</sub> →S <sub>2</sub> )  | 369 | 0.607/0.753 | H-1->LUMO (44%), HOMO->LUMO (18%), HOMO->L+1 (22%)                                                                          |
| 3.723(S <sub>0</sub> →S <sub>3</sub> )  | 333 | 0.226/0.406 | H-3->LUMO (10%), H-1->LUMO (27%), HOMO->LUMO (36%),<br>HOMO->L+1 (13%)                                                      |
| 4.077(S <sub>0</sub> →S <sub>7</sub> )  | 304 | 0.102/0.209 | H-5->LUMO (14%), H-4->LUMO (29%), H-1->L+1 (22%),<br>H-4->L+2 (5%)                                                          |
| 4.554(S <sub>0</sub> →S <sub>11</sub> ) | 272 | 0.149/0.290 | H-1->L+2(18%), HOMO->L+5(23%),H-5->L+1 (5%),, H-3->L+1 (7%),<br>H-2->L+1 (8%),, HOMO->L+4 (5%)                              |
| 4.813(S <sub>0</sub> →S <sub>14</sub> ) | 258 | 0.201/0.370 | H-1->L+2 (12%), HOMO->L+5 (11%), HOMO->L+6 (25%),<br>H-3->L+1 (5%), HOMO->L+3 (7%)                                          |
| 4.898(S <sub>0</sub> →S <sub>16</sub> ) | 253 | 0.175/0.332 | H-4->LUMO (15%), H-4->L+1 (10%), HOMO->L+4 (27%),<br>HOMO->L+6 (10%),H-3->LUMO (7%), H-1->L+4 (8%)                          |
| 5.069(S <sub>0</sub> →S <sub>18</sub> ) | 245 | 0.448/0.644 | H-3->L+2(10%), HOMO->L+3(10%), H-6->L+1 (6%), H-5->LUMO (6%),<br>H-5->L+1 (8%), H-5->L+2 (5%), H-4->L+2 (5%), H-3->L+3 (7%) |
| 5.419(S <sub>0</sub> →S <sub>25</sub> ) | 229 | 0.253/0.442 | H-3->L+1 (14%), H-6->LUMO (9%), H-5->L+2 (5%), H-5->L+3 (7%),<br>H-4->L+3 (6%), H-1->L+2 (5%), HOMO->L+4 (5%)               |
| 5.577(S <sub>0</sub> →S <sub>29</sub> ) | 222 | 0.256/0.445 | H-4->L+2 (21%), H-6->L+1 (5%), H-4->L+3 (5%), H-1->L+3 (5%)                                                                 |
| <b>NKX-2883-Q2/TiO<sub>2</sub></b>      |     |             |                                                                                                                             |
| 2.592(S <sub>0</sub> →S <sub>1</sub> )  | 478 | 2.332/0.995 | HOMO->LUMO (27%), HOMO->L+2 (20%), HOMO->L+3 (32%),<br>HOMO->L+5 (6%)                                                       |
| 3.270(S <sub>0</sub> →S <sub>2</sub> )  | 379 | 0.794/0.839 | H-1->LUMO (44%), HOMO->LUMO (20%), HOMO->L+3 (9%)                                                                           |
| 3.637(S <sub>0</sub> →S <sub>3</sub> )  | 341 | 0.331/0.533 | H-1->LUMO (25%), HOMO->LUMO (46%), H-3->LUMO (6%)                                                                           |
| 4.045(S <sub>0</sub> →S <sub>8</sub> )  | 307 | 0.113/0.229 | H-4->LUMO(26%), H-1->L+3(11%), H-5->LUMO (9%), H-1->L+2 (6%)                                                                |
| 4.531(S <sub>0</sub> →S <sub>26</sub> ) | 274 | 0.130/0.259 | H-1->L+25 (14%), HOMO->L+56 (12%), HOMO->L+12 (5%)                                                                          |

**Table 5S** Estimated  $\Delta G_{(aq)}$ ,  $\Delta G^0$ ,  $\Delta E_{ver}$ ,  $E_{ox(dye)}$ ,  $\Delta G_{reg}$ ,  $f$  and  $LHE$  for all coumarin sensitizers. All calculation is obtained by M062X functional with b-31g(d,p) basis set

| scheme      | $\Delta G_{(aq)}$ <sup>a</sup> | $\Delta G^0$ <sup>b</sup> | $E_{redox}$ <sup>c</sup> | $\Delta E_{ver}$ <sup>d</sup> | $E_{ox(dye)}$ <sup>e</sup> | $E_{ox(dye^*)}$ <sup>f</sup> | $\Delta G_{reg}$ <sup>g</sup> | $f^h$        | $LHE^i$     |
|-------------|--------------------------------|---------------------------|--------------------------|-------------------------------|----------------------------|------------------------------|-------------------------------|--------------|-------------|
| NKX-2311    | 10.501                         | -2.917                    | 6.061                    | 2.704                         | -2.004                     | -0.700                       | -1.704                        | 1.774/ 0.314 | 0.983/0.514 |
| NKX-2677    | 9.401                          | -2.083                    | 4.961                    | 2.439                         | -1.754                     | -0.685                       | -1.454                        | 1.851/ 0.320 | 0.986/0.521 |
| NKX-2677-P1 | 9.720                          | -2.303                    | 5.278                    | 2.537                         | -1.804                     | -0.733                       | -1.504                        | 2.067/ 0.557 | 0.991/0.723 |
| NKX-2677-P2 | 10.468                         | -2.779                    | 6.028                    | 2.81                          | -1.945                     | -0.864                       | -1.645                        | 1.789/ 0.678 | 0.984/0.790 |
| NKX-2700    | 9.078                          | -1.847                    | 4.638                    | 2.351                         | -1.651                     | -0.700                       | -1.351                        | 2.347/ 0.325 | 0.996/0.527 |
| NKX-2700-P1 | 9.464                          | -2.182                    | 5.024                    | 2.403                         | -1.724                     | -0.679                       | -1.424                        | 2.194/ 0.373 | 0.994/0.576 |
| NKX-2700-P2 | 10.093                         | -2.464                    | 5.653                    | 2.750                         | -1.918                     | -0.831                       | -1.618                        | 2.178/ 0.578 | 0.993/0.736 |
| NKX-2883    | 9.265                          | -2.072                    | 4.825                    | 2.313                         | -1.860                     | -0.454                       | -1.560                        | 2.255/ 0.337 | 0.994/0.540 |
| NKX-2883-P1 | 9.589                          | -2.353                    | 5.149                    | 2.356                         | -1.876                     | -0.480                       | -1.576                        | 2.001/ 0.295 | 0.990/0.493 |
| NKX-2883-P2 | 10.267                         | -2.856                    | 5.827                    | 2.530                         | -2.006                     | -0.524                       | -1.706                        | 2.024/ 0.376 | 0.991/0.579 |
| NKX-2883-Q1 | 9.385                          | -2.073                    | 4.945                    | 2.432                         | -1.888                     | -0.544                       | -1.588                        | 2.270/ 0.295 | 0.995/0.493 |
| NKX-2883-Q2 | 9.627                          | -2.145                    | 5.187                    | 2.602                         | -1.956                     | -0.646                       | -1.656                        | 2.117/ 0.607 | 0.992/0.753 |

<sup>a</sup>Calculated Gibbs free energy change ( $\Delta G_{(aq)}$ , in V) due to the oxidation of the dyes in aqueous solutions. <sup>b</sup>The driving force( $\Delta G^0$ , in V) electron injection related to the electronic transition in B1 band. <sup>c</sup>Redox potential ( $E_{redox}$  vs NHE, in V). <sup>d</sup>The vertical excitation energy ( $\Delta E_{ver}$ , eV) corresponding to the maximum wavelength of spectral absorption. <sup>e</sup>The oxidized potential (vs. NHE,  $E_{ox(dye)}$ , in eV) of ground state. <sup>f</sup>The oxidized potential of the first excited state ( $E_{ox(dye^*)}$ ) following unrelax path for dyes. <sup>g</sup>The regeneration energy( $\Delta G_{reg}$ , in V). <sup>h</sup>The oscillation strength of the two major absorption bands (B1 and B2 bands). <sup>i</sup>The light harvest efficiency ( $LHE$ ) corresponding to B1/B2 bands.



**Table 6S** Maximum absorption wavelength ( $\lambda_{\text{max}}$ ) and corresponding oscillation strength ( $f$ ) and light harvesting efficiency ( $\phi_{\text{LHE}}$ ) for NKX-2311, NKX-2677, NKX-2700, and NKX-2883

| Molecule               | NKX-2311(Exp)             | NKX-2677(Exp)             | NKX-2700(Exp)             | NKX-2883(Exp)             |
|------------------------|---------------------------|---------------------------|---------------------------|---------------------------|
| $\lambda_{\text{max}}$ | 2.704(2.460) <sup>a</sup> | 2.439(2.427) <sup>a</sup> | 2.351(2.362) <sup>a</sup> | 2.313(2.246) <sup>a</sup> |
| $f$                    | 1.774                     | 1.851                     | 2.347                     | 2.255                     |
| $\phi_{\text{LHE}}$    | 0.983                     | 0.986                     | 0.996                     | 0.994                     |

a Experimental value from Ref. 12, 22, 23, 24

**Table 7S** Estimated  $\Delta G_{(aq)}$ ,  $\Delta G^0$ ,  $\Delta E_{ver}$ ,  $E_{ox(dye)}$ ,  $\Delta G_{reg}$ ,  $f$  and  $LHE$  for all coumarin sensitizers. All calculation is obtained by B3LYP functional with b-31g(d,p) basis set

| scheme      | $\Delta G_{(aq)}$ <sup>a</sup> | $\Delta G^0$ <sup>b</sup> | $E_{redox}$ <sup>c</sup> | $\Delta E_{ver}$ <sup>d</sup> | $E_{ox(dye)}$ <sup>e</sup> | $E_{ox(dye^*)}$ <sup>f</sup> | $\Delta G_{reg}$ <sup>g</sup> | $f^h$        | $LHE$ <sup>i</sup> |
|-------------|--------------------------------|---------------------------|--------------------------|-------------------------------|----------------------------|------------------------------|-------------------------------|--------------|--------------------|
| NKX-2311    | 6.324                          | -1.024                    | 1.884                    | 2.468                         | -0.867                     | -1.601                       | -0.567                        | 1.553/ 0.504 | 0.972/0.687        |
| NKX-2677    | 5.645                          | -1.181                    | 1.205                    | 1.946                         | -0.615                     | -1.331                       | -0.315                        | 1.272/ 0.701 | 0.947/0.801        |
| NKX-2677-P1 | 5.900                          | -0.951                    | 1.460                    | 1.971                         | -0.705                     | -1.266                       | -0.405                        | 1.315/ 0.874 | 0.952/0.866        |
| NKX-2677-P2 | 6.439                          | -0.410                    | 1.999                    | 1.969                         | -0.851                     | -1.118                       | -0.551                        | 0.775/ 0.619 | 0.832/0.759        |
| NKX-2700    | 5.453                          | -1.292                    | 1.013                    | 1.864                         | -0.527                     | -1.338                       | -0.227                        | 1.650/ 0.831 | 0.978/0.853        |
| NKX-2700-P1 | 5.708                          | -0.980                    | 1.268                    | 1.808                         | -0.619                     | -1.190                       | -0.319                        | 1.410/ 0.992 | 0.961/0.898        |
| NKX-2700-P2 | 6.255                          | -0.548                    | 1.815                    | 1.923                         | -0.813                     | -1.110                       | -0.513                        | 0.902/ 1.399 | 0.875/0.960        |
| NKX-2883    | 5.668                          | -1.121                    | 1.228                    | 1.910                         | -0.721                     | -1.188                       | -0.421                        | 1.725/ 0.491 | 0.981/0.677        |
| NKX-2883-P1 | 5.930                          | -0.831                    | 1.490                    | 1.881                         | -0.798                     | -1.084                       | -0.498                        | 1.382/0.664  | 0.959/0.783        |
| NKX-2883-P2 | 6.387                          | -0.469                    | 1.947                    | 1.976                         | -0.942                     | -1.034                       | -0.642                        | 1.102/0.909  | 0.921/0.877        |
| NKX-2883-Q1 | 5.780                          | -1.019                    | 1.340                    | 1.919                         | -0.740                     | -1.178                       | -0.440                        | 1.424/ 0.834 | 0.962/0.854        |
| NKX-2883-Q2 | 6.067                          | -0.899                    | 1.627                    | 2.085                         | -0.840                     | -1.245                       | -0.540                        | 0.953/ 1.126 | 0.889/0.925        |

<sup>a</sup>Calculated Gibbs free energy change ( $\Delta G_{(aq)}$ , in V) due to the oxidation of the dyes in aqueous solutions. <sup>b</sup>The driving force( $\Delta G^0$ , in V) electron injection related to the electronic transition in B1 band. <sup>c</sup>Redox potential ( $E_{redox}$  vs NHE, in V). <sup>d</sup>The vertical excitation energy ( $\Delta E_{ver}$ , eV) corresponding to the maximum wavelength of spectral absorption. <sup>e</sup>The oxidized potential (vs. NHE,  $E_{ox(dye)}$ , in eV) of ground state. <sup>f</sup>The oxidized potential of the first excited state ( $E_{ox(dye^*)}$ ) following unrelax path for dyes. <sup>g</sup>The regeneration energy( $\Delta G_{reg}$ , in V). <sup>h</sup>The oscillation strength of the two major absorption bands (B1 and B2 bands). <sup>i</sup>The light harvest efficiency ( $LHE$ ) corresponding to B1/B2 bands.

**Table 8S** Electronic transition data obtained by TD-B3LYP/6-31g(d,p) level for all free dyes and dye-titania complexes in ethanol solution with B3LYP/6-31g(d,p) geometries

| Transition energy(eV)                   | Wavelength/nm | Oscillator strength/<br>Light harvest efficiency | Wavelength                                                       |
|-----------------------------------------|---------------|--------------------------------------------------|------------------------------------------------------------------|
| <b>NKX-2311</b>                         |               |                                                  |                                                                  |
| 2.468(S <sub>0</sub> →S <sub>1</sub> )  | 502           | 1.553/0.972                                      | HOMO->LUMO (100%)                                                |
| 3.467(S <sub>0</sub> →S <sub>3</sub> )  | 358           | 0.138/0.272                                      | H-2->LUMO (31%), HOMO->L+1 (65%)                                 |
| 3.798(S <sub>0</sub> →S <sub>4</sub> )  | 326           | 0.173/0.329                                      | H-2->LUMO (27%), H-1->LUMO (43%), HOMO->L+1 (23%)                |
| 5.963(S <sub>0</sub> →S <sub>27</sub> ) | 208           | 0.504/0.687                                      | H-5->L+1 (14%), H-2->L+2 (52%), H-1->L+2 (15%), HOMO->L+6 (6%)   |
| 6.223(S <sub>0</sub> →S <sub>30</sub> ) | 199           | 0.142/0.279                                      | H-14->LUMO (11%), H-2->L+3 (58%), H-5->L+1 (5%), H-2->L+2 (5%)   |
| <b>NKX-2311/TiO<sub>2</sub></b>         |               |                                                  |                                                                  |
| 2.146(S <sub>0</sub> →S <sub>1</sub> )  | 578           | 1.470                                            | HOMO->LUMO (96%)                                                 |
| 2.316(S <sub>0</sub> →S <sub>4</sub> )  | 535           | 0.123                                            | HOMO->L+3 (95%)                                                  |
| <b>NKX-2677</b>                         |               |                                                  |                                                                  |
| 1.946(S <sub>0</sub> →S <sub>1</sub> )  | 637           | 1.272/0.947                                      | HOMO->LUMO (100%)                                                |
| 2.725(S <sub>0</sub> →S <sub>2</sub> )  | 455           | 0.701/0.801                                      | H-1->LUMO (58%), HOMO->L+1 (42%)                                 |
| 3.026(S <sub>0</sub> →S <sub>3</sub> )  | 409           | 0.117/0.236                                      | H-1->LUMO (42%), HOMO->L+1 (56%)                                 |
| <b>NKX-2677-TiO<sub>2</sub></b>         |               |                                                  |                                                                  |
| 1.757(S <sub>0</sub> →S <sub>1</sub> )  | 705           | 1.409/0.961                                      | HOMO->LUMO (100%)                                                |
| 2.574(S <sub>0</sub> →S <sub>14</sub> ) | 482           | 0.174/0.330                                      | H-1->LUMO (15%), HOMO->L+13 (79%)                                |
| 2.582(S <sub>0</sub> →S <sub>15</sub> ) | 480           | 0.547/0.716                                      | H-1->LUMO (63%), HOMO->L+13 (20%), HOMO->L+23 (6%)               |
| <b>NKX-2677-P1</b>                      |               |                                                  |                                                                  |
| 1.971(S <sub>0</sub> →S <sub>1</sub> )  | 629           | 1.315/0.952                                      | HOMO->LUMO (100%)                                                |
| 2.806(S <sub>0</sub> →S <sub>2</sub> )  | 442           | 0.874/0.866                                      | H-1->LUMO (34%), HOMO->L+1 (65%)                                 |
| 4.115(S <sub>0</sub> →S <sub>11</sub> ) | 301           | 0.141/0.277                                      | H-5->LUMO (72%), H-1->L+1 (14%)                                  |
| 4.910(S <sub>0</sub> →S <sub>23</sub> ) | 253           | 0.123/0.247                                      | H-5->L+1 (12%), HOMO->L+5 (60%), H-1->L+3 (5%)                   |
| <b>NKX-2677-P2</b>                      |               |                                                  |                                                                  |
| 1.969(S <sub>0</sub> →S <sub>1</sub> )  | 630           | 0.775/0.832                                      | HOMO->LUMO (100%)                                                |
| 2.916(S <sub>0</sub> →S <sub>2</sub> )  | 425           | 0.320/0.521                                      | H-2->LUMO (51%), H-1->LUMO (17%), HOMO->L+1 (24%)                |
| 2.932(S <sub>0</sub> →S <sub>3</sub> )  | 423           | 0.619/0.760                                      | H-2->LUMO (36%), HOMO->L+1 (49%), H-3->LUMO (6%), H-1->LUMO (5%) |
| 2.025(S <sub>0</sub> →S <sub>4</sub> )  | 410           | 0.116/0.234                                      | H-1->LUMO (75%), HOMO->L+1 (15%)                                 |
| 3.321(S <sub>0</sub> →S <sub>6</sub> )  | 373           | 0.193/0.359                                      | H-3->LUMO (20%), HOMO->L+2 (76%)                                 |
| 3.420(S <sub>0</sub> →S <sub>7</sub> )  | 362           | 0.205/0.376                                      | H-3->LUMO (68%), HOMO->L+2 (21%), HOMO->L+1 (9%)                 |
| 4.052(S <sub>0</sub> →S <sub>13</sub> ) | 306           | 0.176/0.333                                      | H-6->LUMO (17%), H-5->LUMO (68%), H-3->L+1 (5%)                  |
| <b>NKX-2700</b>                         |               |                                                  |                                                                  |
| 1.864(S <sub>0</sub> →S <sub>1</sub> )  | 665           | 1.650/0.978                                      | HOMO->LUMO (100%)                                                |
| 2.571(S <sub>0</sub> →S <sub>2</sub> )  | 482           | 0.831/0.852                                      | H-1->LUMO (65%), HOMO->L+1 (34%)                                 |
| 2.862(S <sub>0</sub> →S <sub>3</sub> )  | 433           | 0.103/0.211                                      | H-1->LUMO (34%), HOMO->L+1 (63%)                                 |
| <b>NKX-2700/TiO<sub>2</sub></b>         |               |                                                  |                                                                  |
| 1.696(S <sub>0</sub> →S <sub>1</sub> )  | 731           | 1.783/0.984                                      | HOMO->LUMO (100%)                                                |
| 2.332(S <sub>0</sub> →S <sub>10</sub> ) | 532           | 0.116/0.234                                      | HOMO->L+8 (12%), HOMO->L+9 (80%)                                 |
| 2.424(S <sub>0</sub> →S <sub>12</sub> ) | 512           | 0.629/0.765                                      | H-1->LUMO (64%), HOMO->L+11 (22%)                                |
| 2.424(S <sub>0</sub> →S <sub>13</sub> ) | 511           | 0.155/0.300                                      | H-1->LUMO (17%), HOMO->L+11 (74%)                                |

|                                    |       |             |                                                                                         |
|------------------------------------|-------|-------------|-----------------------------------------------------------------------------------------|
| <b>NKX-2700-P1</b>                 |       |             |                                                                                         |
| 1.808( $S_0 \rightarrow S_1$ )     | 686   | 1.410/0.961 | HOMO->LUMO (100%)                                                                       |
| 2.619( $S_0 \rightarrow S_2$ )     | 473   | 0.992/0.898 | H-1->LUMO (56%), HOMO->L+1 (43%)                                                        |
| 3.577( $S_0 \rightarrow S_8$ )     | 347   | 0.115/0.233 | H-3->LUMO (41%), H-1->L+1 (52%)                                                         |
| <b>NKX-2700-P2</b>                 |       |             |                                                                                         |
| 1.923( $S_0 \rightarrow S_1$ )     | 645   | 0.902/0.875 | HOMO->LUMO (100%)                                                                       |
| 2.783( $S_0 \rightarrow S_2$ )     | 445   | 1.399/0.960 | H-1->LUMO (27%), HOMO->L+1 (68%)                                                        |
| <b>NKX-2883</b>                    |       |             |                                                                                         |
| 1.909( $S_0 \rightarrow S_1$ )     | 649.5 | 1.725/0.981 | HOMO->LUMO (100%)                                                                       |
| 2.478( $S_0 \rightarrow S_2$ )     | 500   | 0.491/0.677 | H-1->LUMO (27%), HOMO->L+1 (72%)                                                        |
| 2.809( $S_0 \rightarrow S_3$ )     | 441   | 0.149/0.290 | H-1->LUMO (73%), HOMO->L+1 (27%)                                                        |
| 3.679( $S_0 \rightarrow S_7$ )     | 337   | 0.100/0.206 | H-4->LUMO (14%), H-3->LUMO (37%), HOMO->L+2 (32%), H-1->L+1 (8%)                        |
| 4.039( $S_0 \rightarrow S_{11}$ )  | 307   | 0.143/0.280 | H-3->L+1 (29%), HOMO->L+3 (56%), H-5->LUMO (8%)                                         |
| <b>NKX-2883/TiO<sub>2</sub></b>    |       |             |                                                                                         |
| 1.761                              | 704   | 1.802/0.984 | HOMO->LUMO (99%)                                                                        |
| 2.368                              | 523   | 0.344/0.547 | H-1->LUMO (12%), HOMO->L+7 (50%), HOMO->L+8 (30%)                                       |
| 2.389                              | 519   | 0.244/0.430 | H-1->LUMO (11%), HOMO->L+7 (47%), HOMO->L+8 (34%)                                       |
| <b>NKX-2883-P1</b>                 |       |             |                                                                                         |
| 1.881( $S_0 \rightarrow S_1$ )     | 656   | 1.382/0.959 | HOMO->LUMO (100%)                                                                       |
| 2.522( $S_0 \rightarrow S_2$ )     | 491   | 0.664/0.783 | H-1->LUMO (16%), HOMO->L+1 (84%)                                                        |
| 2.903( $S_0 \rightarrow S_3$ )     | 427   | 0.233/0.415 | H-1->LUMO (82%), HOMO->L+1 (16%)                                                        |
| 3.861( $S_0 \rightarrow S_{11}$ )  | 321   | 0.212/0.386 | H-5->LUMO (34%), H-3->LUMO (38%), H-1->L+1 (12%), HOMO->L+3 (8%)                        |
| 4.088( $S_0 \rightarrow S_{12}$ )  | 301   | 0.179/0.338 | HOMO->L+4 (89%)                                                                         |
| <b>NKX-2883-P1/TiO<sub>2</sub></b> |       |             |                                                                                         |
| 1.772( $S_0 \rightarrow S_1$ )     | 670   | 1.404/0.961 | HOMO->LUMO (99%)                                                                        |
| 2.419( $S_0 \rightarrow S_8$ )     | 512   | 0.293/0.491 | HOMO->L+7 (65%), HOMO->L+8 (24%), H-1->LUMO (5%)                                        |
| 2.448( $S_0 \rightarrow S_9$ )     | 506   | 0.264/0.455 | HOMO->L+7 (33%), HOMO->L+8 (56%), H-1->LUMO (6%)                                        |
| 2.580( $S_0 \rightarrow S_{11}$ )  | 481   | 0.149/0.290 | H-1->LUMO (12%), HOMO->L+8 (11%), HOMO->L+10(32%),<br>HOMO->L+11(15%), HOMO->L+12 (25%) |
| 2.8065( $S_0 \rightarrow S_{16}$ ) | 442   | 0.212/0.386 | H-1->LUMO (59%), HOMO->L+14 (17%), HOMO->L+12 (9%),<br>HOMO->L+13 (6%)                  |
| <b>NKX-2883-P2</b>                 |       |             |                                                                                         |
| 1.976( $S_0 \rightarrow S_1$ )     | 628   | 1.102/0.921 | HOMO->LUMO (100%)                                                                       |
| 2.596( $S_0 \rightarrow S_2$ )     | 478   | 0.909/0.877 | HOMO->L+1 (94%)                                                                         |
| 3.201( $S_0 \rightarrow S_5$ )     | 387   | 0.365/0.568 | H-2->LUMO (74%), H-1->LUMO (19%)                                                        |
| 3.753( $S_0 \rightarrow S_{10}$ )  | 330   | 0.146/0.286 | H-4->LUMO (50%), H-2->L+1 (35%), H-1->L+1 (10%)                                         |
| 3.936( $S_0 \rightarrow S_{13}$ )  | 315   | 0.166/0.318 | H-4->LUMO (40%), H-2->L+1 (21%), H-1->L+1 (15%), HOMO->L+3 (13%),<br>HOMO->L+4 (6%)     |
| 4.209( $S_0 \rightarrow S_{16}$ )  | 295   | 0.116/0.234 | HOMO->L+5 (90%)                                                                         |
| <b>NKX-2883-P2/TiO<sub>2</sub></b> |       |             |                                                                                         |
| 1.8773( $S_0 \rightarrow S_1$ )    | 660   | 1.060/0.913 | HOMO->LUMO (99%)                                                                        |
| 2.4934( $S_0 \rightarrow S_6$ )    | 497   | 0.283/0.479 | HOMO->L+5 (82%), HOMO->L+6 (8%)                                                         |
| 2.5233( $S_0 \rightarrow S_7$ )    | 491   | 0.403/0.605 | HOMO->L+5 (17%), HOMO->L+6 (60%), HOMO->L+7 (11%),                                      |

|                                    |       |             |                                                                                                  |
|------------------------------------|-------|-------------|--------------------------------------------------------------------------------------------------|
|                                    |       |             | HOMO->L+8 (8%)                                                                                   |
| 2.5640( $S_0 \rightarrow S_8$ )    | 484   | 0.146/0.286 | HOMO->L+6 (27%), HOMO->L+7 (60%), HOMO->L+8 (10%)                                                |
| 2.5975( $S_0 \rightarrow S_9$ )    | 477   | 0.153/0.297 | HOMO->L+7 (23%), HOMO->L+8 (71%)                                                                 |
| 3.1016( $S_0 \rightarrow S_{22}$ ) | 340   | 0.397/0.599 | H-2->LUMO (80%), H-1->LUMO (7%)                                                                  |
| <b>NKX-2883-Q1</b>                 |       |             |                                                                                                  |
| 1.919( $S_0 \rightarrow S_1$ )     | 646   | 1.424/0.962 | HOMO->LUMO (99%)                                                                                 |
| 2.453( $S_0 \rightarrow S_2$ )     | 505   | 0.834/0.853 | HOMO->L+1 (90%), H-1->LUMO (9%)                                                                  |
| 2.823( $S_0 \rightarrow S_3$ )     | 439   | 0.217/0.393 | H-1->LUMO (89%), HOMO->L+1 (9%)                                                                  |
| 3.663( $S_0 \rightarrow S_{11}$ )  | 338   | 0.115/0.232 | H-4->LUMO (43%), H-3->LUMO (17%), HOMO->L+3 (18%), H-2->L+1 (5%),<br>H-1->L+1 (7%)               |
| 4.060( $S_0 \rightarrow S_{15}$ )  | 305   | 0.132/0.262 | H-1->L+2 (38%), HOMO->L+4 (53%)                                                                  |
| 4.593( $S_0 \rightarrow S_{24}$ )  | 270   | 0.251/0.439 | H-3->L+2 (77%), H-2->L+2 (12%)                                                                   |
| <b>NKX-2883-Q1/TiO<sub>2</sub></b> |       |             |                                                                                                  |
| 1.833( $S_0 \rightarrow S_1$ )     | 676.5 | 1.361/0.956 | HOMO->LUMO (98%)                                                                                 |
| 2.371( $S_0 \rightarrow S_8$ )     | 523   | 0.628/0.764 | HOMO->L+7 (39%), HOMO->L+8 (49%)                                                                 |
| 2.402( $S_0 \rightarrow S_9$ )     | 516   | 0.166/0.318 | HOMO->L+7 (60%), HOMO->L+8 (36%)                                                                 |
| 2.736( $S_0 \rightarrow S_{16}$ )  | 453   | 0.136/0.269 | H-1->LUMO (51%), HOMO->L+14 (42%)                                                                |
| <b>NKX-2883-Q2</b>                 |       |             |                                                                                                  |
| 2.085( $S_0 \rightarrow S_1$ )     | 595   | 0.953/0.891 | HOMO->LUMO (98%)                                                                                 |
| 2.461( $S_0 \rightarrow S_2$ )     | 504   | 1.126/0.925 | HOMO->L+1 (95%)                                                                                  |
| 2.891( $S_0 \rightarrow S_3$ )     | 429   | 0.413/0.614 | H-1->LUMO (94%)                                                                                  |
| 3.357( $S_0 \rightarrow S_8$ )     | 369   | 0.129/0.257 | H-4->LUMO (63%), H-3->LUMO (24%)                                                                 |
| 3.625( $S_0 \rightarrow S_{12}$ )  | 342   | 0.230/0.411 | H-5->LUMO (57%), H-3->LUMO (23%), H-4->LUMO (5%), HOMO->L+6 (6%)                                 |
| 4.504( $S_0 \rightarrow S_{28}$ )  | 275   | 0.192/0.357 | H-8->L+1 (15%), H-4->L+2 (35%), H-2->L+2 (13%), HOMO->L+6 (10%),<br>H-3->L+2 (9%), H-1->L+4 (8%) |
| <b>NKX-2883-Q2/TiO<sub>2</sub></b> |       |             |                                                                                                  |
| 1.983( $S_0 \rightarrow S_1$ )     | 625   | 0.797/0.840 | HOMO->LUMO (97%)                                                                                 |
| 2.395( $S_0 \rightarrow S_8$ )     | 518   | 0.492/0.678 | HOMO->L+5 (69%), HOMO->L+8 (18%), HOMO->L+7 (6%)                                                 |
| 2.421( $S_0 \rightarrow S_7$ )     | 512   | 0.664/0.783 | HOMO->L+5 (30%), HOMO->L+6 (12%), HOMO->L+7 (11%),<br>HOMO->L+8 (39%)                            |
| 2.761( $S_0 \rightarrow S_{14}$ )  | 449   | 0.434/0.631 | H-1->LUMO (83%), HOMO->L+13 (5%)                                                                 |

**Table 9S** Electronic transition data obtained by TD-PBE0/6-31g(d,p) level for all free dyes and dye-titania complexes in ethanol solution with B3LYP/6-31g(d,p) geometries

| Transition energy(eV)                   | Wavelength/nm | Oscillator strength/<br>Light harvest efficiency | Wavelength                                                                           |
|-----------------------------------------|---------------|--------------------------------------------------|--------------------------------------------------------------------------------------|
| <b>NKX-2311</b>                         |               |                                                  |                                                                                      |
| 2.528(S <sub>0</sub> →S <sub>1</sub> )  | 490           | 1.626/0.976                                      | HOMO->LUMO (100%)                                                                    |
| 3.623(S <sub>0</sub> →S <sub>3</sub> )  | 342           | 0.111/0.226                                      | H-2->LUMO (26%), HOMO->L+1 (70%)                                                     |
| 3.893(S <sub>0</sub> →S <sub>4</sub> )  | 319           | 0.177/0.335                                      | H-2->LUMO (29%), H-1->LUMO (46%), HOMO->L+1 (19%)                                    |
| 6.032(S <sub>0</sub> →S <sub>24</sub> ) | 205           | 0.221/0.399                                      | H-4->L+1 (34%), H-2->L+2 (36%), H-1->L+3 (11%), H-2->L+3 (7%),<br>H-1->L+2 (5%)      |
| 6.126(S <sub>0</sub> →S <sub>27</sub> ) | 202           | 0.345/0.548                                      | H-4->L+1 (37%), H-2->L+2 (35%), HOMO->L+6 (12%), H-1->L+2 (6%)                       |
| 6.266(S <sub>0</sub> →S <sub>28</sub> ) | 198           | 0.125/0.250                                      | H-4->L+1 (15%), H-1->L+3 (69%)                                                       |
| 6.405(S <sub>0</sub> →S <sub>30</sub> ) | 194           | 0.118/0.238                                      | H-2->L+3 (67%), H-15->LUMO (9%)                                                      |
| <b>NKX-2311/TiO<sub>2</sub></b>         |               |                                                  |                                                                                      |
| 2.253(S <sub>0</sub> →S <sub>1</sub> )  | 550           | 1.886/0.987                                      | HOMO->LUMO (99%)                                                                     |
| <b>NKX-2677</b>                         |               |                                                  |                                                                                      |
| 2.047(S <sub>0</sub> →S <sub>1</sub> )  | 606           | 1.407/0.966                                      | HOMO->LUMO (99%)                                                                     |
| 2.866(S <sub>0</sub> →S <sub>2</sub> )  | 432           | 0.614/0.757                                      | H-1->LUMO (56%), HOMO->L+1 (42%)                                                     |
| 3.110(S <sub>0</sub> →S <sub>3</sub> )  | 399           | 0.130/0.259                                      | H-1->LUMO (43%), HOMO->L+1 (56%)                                                     |
| <b>NKX-2677-TiO<sub>2</sub></b>         |               |                                                  |                                                                                      |
| 1.886(S <sub>0</sub> →S <sub>1</sub> )  | 657           | 1.634/0.977                                      | HOMO->LUMO (98%)                                                                     |
| 2.705(S <sub>0</sub> →S <sub>9</sub> )  | 458           | 0.469/0.660                                      | H-1->LUMO (29%), HOMO->L+8 (45%), HOMO->L+7 (7%)                                     |
| 2.768(S <sub>0</sub> →S <sub>11</sub> ) | 448           | 0.270/0.463                                      | H-1->LUMO (49%), HOMO->L+8 (40%)                                                     |
| <b>NKX-2677-P1</b>                      |               |                                                  |                                                                                      |
| 2.087(S <sub>0</sub> →S <sub>1</sub> )  | 594           | 1.472/0.966                                      | HOMO->LUMO (99%)                                                                     |
| 2.942(S <sub>0</sub> →S <sub>2</sub> )  | 421           | 0.742/0.819                                      | H-1->LUMO (25%), HOMO->L+1 (73%)                                                     |
| 4.242(S <sub>0</sub> →S <sub>11</sub> ) | 292           | 0.141/0.277                                      | H-5->LUMO (79%), H-1->L+1 (10%)                                                      |
| 5.069(S <sub>0</sub> →S <sub>22</sub> ) | 245           | 0.105/0.215                                      | HOMO->L+5 (75%), H-5->L+1 (6%)                                                       |
| 5.341(S <sub>0</sub> →S <sub>27</sub> ) | 232           | 0.106/0.217                                      | H-2->L+3 (83%), H-3->L+2 (6%)                                                        |
| <b>NKX-2677-P2</b>                      |               |                                                  |                                                                                      |
| 2.138(S <sub>0</sub> →S <sub>1</sub> )  | 580           | 0.911/0.877                                      | HOMO->LUMO (99%)                                                                     |
| 3.052(S <sub>0</sub> →S <sub>2</sub> )  | 406           | 0.933/0.883                                      | HOMO->L+1 (84%), H-3->LUMO (6%), H-1->LUMO (6%)                                      |
| 3.521(S <sub>0</sub> →S <sub>6</sub> )  | 352           | 0.421/0.621                                      | H-3->LUMO (61%), HOMO->L+2 (27%), HOMO->L+1 (5%)                                     |
| 4.222(S <sub>0</sub> →S <sub>12</sub> ) | 294           | 0.108/0.220                                      | H-7->LUMO (11%), H-6->LUMO (14%), H-5->LUMO (60%)                                    |
| <b>NKX-2700</b>                         |               |                                                  |                                                                                      |
| 1.962(S <sub>0</sub> →S <sub>1</sub> )  | 632           | 1.825/0.985                                      | HOMO->LUMO (99%)                                                                     |
| 2.714(S <sub>0</sub> →S <sub>2</sub> )  | 457           | 0.710/0.805                                      | H-1->LUMO (66%), HOMO->L+1 (32%)                                                     |
| 2.955(S <sub>0</sub> →S <sub>3</sub> )  | 420           | 0.122/0.225                                      | H-1->LUMO (33%), HOMO->L+1 (65%)                                                     |
| <b>NKX-2700/TiO<sub>2</sub></b>         |               |                                                  |                                                                                      |
| 1.818(S <sub>0</sub> →S <sub>1</sub> )  | 682           | 2.062/0.991                                      | HOMO->LUMO (98%)                                                                     |
| 2.551(S <sub>0</sub> →S <sub>7</sub> )  | 486           | 0.110/0.224                                      | HOMO->L+5 (11%), HOMO->L+6 (73%), H-1->LUMO (5%)                                     |
| 2.578(S <sub>0</sub> →S <sub>8</sub> )  | 481           | 0.621/0.761                                      | H-1->LUMO (60%), HOMO->L+6 (15%), HOMO->L+7 (6%),<br>HOMO->L+8 (5%), HOMO->L+16 (7%) |

|                                    |       |             |                                                                                                       |
|------------------------------------|-------|-------------|-------------------------------------------------------------------------------------------------------|
| <b>NKX-2700-P1</b>                 |       |             |                                                                                                       |
| 1.925( $S_0 \rightarrow S_1$ )     | 644   | 1.575/0.973 | HOMO->LUMO (99%)                                                                                      |
| 2.765( $S_0 \rightarrow S_2$ )     | 448   | 0.891/0.870 | H-1->LUMO (50%), HOMO->L+1 (47%)                                                                      |
| 3.000( $S_0 \rightarrow S_3$ )     | 413   | 0.111/0.226 | H-1->LUMO (48%), HOMO->L+1 (51%)                                                                      |
| <b>NKX-2700-P2</b>                 |       |             |                                                                                                       |
| 2.089( $S_0 \rightarrow S_1$ )     | 593   | 1.080/0.917 | HOMO->LUMO (98%)                                                                                      |
| 2.918( $S_0 \rightarrow S_2$ )     | 425   | 1.305/0.950 | H-1->LUMO (23%), HOMO->L+1 (70%)                                                                      |
| 3.201( $S_0 \rightarrow S_4$ )     | 387   | 0.185/0.347 | H-1->LUMO (65%), HOMO->L+1 (24%)H-3->LUMO (5%)                                                        |
| 4.913( $S_0 \rightarrow S_{25}$ )  | 252   | 0.129/0.257 | H-5->L+1 (19%), H-2->L+2 (14%), H-2->L+3 (13%), H-1->L+3 (20%),<br>HOMO->L+6 (12%), H-4->L+1 (5%)     |
| <b>NKX-2883</b>                    |       |             |                                                                                                       |
| 1.998( $S_0 \rightarrow S_1$ )     | 620   | 1.897/0.987 | HOMO->LUMO (98%)                                                                                      |
| 2.623( $S_0 \rightarrow S_2$ )     | 472   | 0.361/0.564 | H-1->LUMO (19%), HOMO->L+1 (79%)                                                                      |
| 2.893( $S_0 \rightarrow S_3$ )     | 429   | 0.175/0.332 | H-1->LUMO (80%), HOMO->L+1 (20%)                                                                      |
| 3.796( $S_0 \rightarrow S_7$ )     | 327   | 0.108/0.220 | H-3->LUMO (42%), HOMO->L+2 (36%), H-4->LUMO (9%), H-1->L+1 (6%)                                       |
| 4.224( $S_0 \rightarrow S_{11}$ )  | 294   | 0.154/0.299 | H-3->L+1 (14%), HOMO->L+3 (68%), H-5->LUMO (5%), H-1->L+2 (5%)                                        |
| <b>NKX-2883/TiO<sub>2</sub></b>    |       |             |                                                                                                       |
| 1.8770( $S_0 \rightarrow S_1$ )    | 661   | 2.080/0.992 | HOMO->LUMO (97%)                                                                                      |
| 2.4947( $S_0 \rightarrow S_3$ )    | 497   | 0.390/0.593 | H-1->LUMO (10%), HOMO->L+2 (33%), HOMO->L+3(24%),<br>HOMO->L+7(14%), HOMO->L+5 (8%), HOMO->L+6 (5%)   |
| <b>NKX-2883-P1</b>                 |       |             |                                                                                                       |
| 1.990( $S_0 \rightarrow S_1$ )     | 623   | 1.568/0.973 | HOMO->LUMO (98%)                                                                                      |
| 2.654( $S_0 \rightarrow S_2$ )     | 467   | 0.501/0.684 | H-1->LUMO (10%), HOMO->L+1 (88%)                                                                      |
| 3.030( $S_0 \rightarrow S_3$ )     | 409   | 0.284/0.480 | H-1->LUMO (88%), HOMO->L+1 (11%)                                                                      |
| 4.004( $S_0 \rightarrow S_{11}$ )  | 310   | 0.254/0.443 | H-5->LUMO (43%), H-3->LUMO (38%)H-1->L+1 (9%), HOMO->L+3 (6%)                                         |
| 4.263( $S_0 \rightarrow S_{13}$ )  | 291   | 0.151/0.294 | HOMO->L+4 (86%)                                                                                       |
| <b>NKX-2883-P1/TiO<sub>2</sub></b> |       |             |                                                                                                       |
| 1.907( $S_0 \rightarrow S_1$ )     | 650   | 1.657/0.978 | HOMO->LUMO (97%)                                                                                      |
| 2.543( $S_0 \rightarrow S_3$ )     | 488   | 0.477/0.667 | HOMO->L+2 (32%), HOMO->L+3 (20%), HOMO->L+5 (14%),<br>HOMO->L+7 (14%), H-1->LUMO (6%), HOMO->L+6 (8%) |
| 2.639( $S_0 \rightarrow S_5$ )     | 470   | 0.108/0.220 | HOMO->L+3 (51%), HOMO->L+5 (15%), HOMO->L+4 (8%),<br>HOMO->L+6 (6%), HOMO->L+7 (9%)                   |
| 2.907( $S_0 \rightarrow S_{10}$ )  | 426.5 | 0.230/0.411 | H-1->LUMO (53%), HOMO->L+7 (12%) HOMO->L+10 (15%),<br>HOMO->L+8 (7%), HOMO->L+11(7%)                  |
| 2.973( $S_0 \rightarrow S_{12}$ )  | 417   | 0.130/0.259 | H-1->LUMO (26%), HOMO->L+10 (65%), HOMO->L+11 (5%)                                                    |
| <b>NKX-2883-P2</b>                 |       |             |                                                                                                       |
| 2.122( $S_0 \rightarrow S_1$ )     | 584   | 1.371/0.957 | HOMO->LUMO (98%)                                                                                      |
| 2.711( $S_0 \rightarrow S_2$ )     | 457   | 0.653/0.778 | HOMO->L+1 (94%)                                                                                       |
| 3.360( $S_0 \rightarrow S_5$ )     | 369   | 0.468/0.660 | H-2->LUMO (71%), H-1->LUMO (20%)                                                                      |
| 4.017( $S_0 \rightarrow S_{11}$ )  | 309   | 0.160/0.308 | H-4->LUMO (34%), H-2->L+1 (11%), HOMO->L+4 (34%),H-1->L+1 (9%),<br>HOMO->L+3 (5%)                     |
| 4.386( $S_0 \rightarrow S_{17}$ )  | 283   | 0.106/0.308 | HOMO->L+5 (84%), HOMO->L+6 (8%)                                                                       |
| <b>NKX-2883-P2/TiO<sub>2</sub></b> |       |             |                                                                                                       |

|                                    |       |             |                                                                                                       |
|------------------------------------|-------|-------------|-------------------------------------------------------------------------------------------------------|
| 2.049( $S_0 \rightarrow S_1$ )     | 605   | 1.367/0.957 | HOMO->LUMO (97%)                                                                                      |
| 2.638( $S_0 \rightarrow S_2$ )     | 470   | 0.682/0.792 | HOMO->L+1 (18%), HOMO->L+2 (18%), HOMO->L+4 (16%),<br>HOMO->L+5(32%), HOMO->L+3(6%)                   |
| 2.649( $S_0 \rightarrow S_3$ )     | 468   | 0.131/0.260 | HOMO->L+1 (81%), HOMO->L+2 (6%), HOMO->L+5 (6%)                                                       |
| 3.279( $S_0 \rightarrow S_{16}$ )  | 378   | 0.426/0.625 | H-2->LUMO (69%), HOMO->L+13 (15%)                                                                     |
| <b>NKX-2883-Q1</b>                 |       |             |                                                                                                       |
| 2.042( $S_0 \rightarrow S_1$ )     | 607   | 1.695/0.980 | HOMO->LUMO (96%)                                                                                      |
| 2.581( $S_0 \rightarrow S_2$ )     | 480   | 0.577/0.735 | HOMO->L+1 (92%)                                                                                       |
| 2.961( $S_0 \rightarrow S_3$ )     | 418   | 0.293/0.491 | H-1->LUMO (92%), HOMO->L+1(5%)                                                                        |
| 3.785( $S_0 \rightarrow S_{10}$ )  | 328   | 0.173/0.329 | H-4->LUMO (57%), H-3->LUMO (16%), H-2->L+1(5%), HOMO->L+3(6%)                                         |
| 4.219( $S_0 \rightarrow S_{14}$ )  | 294   | 0.156/0.302 | HOMO->L+4 (71%), H-7->LUMO (9%), H-4->L+1 (6%), H-1->L+2 (5%)                                         |
| 4.760( $S_0 \rightarrow S_{24}$ )  | 260   | 0.309/0.509 | H-3->L+2 (79%), H-2->L+2 (5%)                                                                         |
| <b>NKX-2883-Q1/TiO<sub>2</sub></b> |       |             |                                                                                                       |
| 1.987( $S_0 \rightarrow S_1$ )     | 624   | 1.756/0.982 | HOMO->LUMO (95%)                                                                                      |
| 2.500( $S_0 \rightarrow S_3$ )     | 496   | 0.552/0.719 | HOMO->L+2 (21%), HOMO->L+3 (19%), HOMO->L+5 (16%),<br>HOMO->L+6 (20%), HOMO->L+1 (7%), HOMO->L+7 (8%) |
| 2.876( $S_0 \rightarrow S_{10}$ )  | 431   | 0.348/0.551 | H-1->LUMO (72%), HOMO->L+9 (6%), HOMO->L+10 (7%)                                                      |
| <b>NKX-2883-Q2</b>                 |       |             |                                                                                                       |
| 2.244( $S_0 \rightarrow S_1$ )     | 552   | 1.430/0.963 | HOMO->LUMO (90%), HOMO->L+1 (8%)                                                                      |
| 2.581( $S_0 \rightarrow S_2$ )     | 480   | 0.668/0.785 | HOMO->L+1 (89%), HOMO->LUMO (9%)                                                                      |
| 3.043( $S_0 \rightarrow S_3$ )     | 407   | 0.541/0.712 | H-1->LUMO (93%)                                                                                       |
| 3.548( $S_0 \rightarrow S_8$ )     | 349.5 | 0.145/0.284 | H-4->LUMO (48%), H-3->LUMO (27%), HOMO->L+2 (9%)                                                      |
| 3.758( $S_0 \rightarrow S_{10}$ )  | 330   | 0.128/0.255 | H-5->LUMO (27%), H-2->LUMO (33%), H-2->L+1 (21%), HOMO->L+3 (5%)                                      |
| 4.069( $S_0 \rightarrow S_{15}$ )  | 305   | 0.137/0.271 | H-4->L+1 (29%), H-3->L+1 (40%), HOMO->L+4 (18%)                                                       |
| 4.263( $S_0 \rightarrow S_{18}$ )  | 291   | 0.103/0.211 | H-5->L+1 (18%), H-1->L+2 (13%), HOMO->L+5 (50%), HOMO->L+4 (5%)                                       |
| 4.700( $S_0 \rightarrow S_{28}$ )  | 264   | 0.273/0.467 | H-4->L+2 (40%), H-3->L+2 (19%), H-2->L+2 (16%)                                                        |
| <b>NKX-2883-Q2/TiO<sub>2</sub></b> |       |             |                                                                                                       |
| 2.180( $S_0 \rightarrow S_1$ )     | 569   | 1.346/0.955 | HOMO->LUMO (91%)                                                                                      |
| 2.524( $S_0 \rightarrow S_2$ )     | 491   | 0.953/0.889 | HOMO->L+3(12%), HOMO->L+4(11%), HOMO->L+5(50%),<br>HOMO->LUMO (8%), HOMO->L+2(6%), HOMO->L+6(5%)      |
| 2.937( $S_0 \rightarrow S_{10}$ )  | 422   | 0.716/0.808 | H-1->LUMO (91%)                                                                                       |
| 3.491( $S_0 \rightarrow S_{26}$ )  | 355   | 0.117/0.236 | H-4->LUMO (36%), H-3->LUMO (17%), HOMO->L+19 (30%)                                                    |



**Table 10S** Electron density difference plots of electronic transition  $S_0 \rightarrow S_1$  for each coumarin dyes performed in ethanol solution using the B3LYP functional with 6-31G(d,p) basis set.  $L$  is the electron transfer distance ( $\text{\AA}$ );  $\Delta e$  is the fraction of electron exchange ( $|e^-|$ ),  $\Omega$  is overlaps between the regions of density depletion and increment. (Isovalue:  $4 \times 10^{-4} \text{ e au}^{-3}$ )

| Molecule    | picture                                                                             | $f$   | $L$    | $\Delta e$ | $\Omega$ |
|-------------|-------------------------------------------------------------------------------------|-------|--------|------------|----------|
| NKX-2311    | 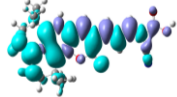   | 1.553 | 4.514  | 1.034      | 0.425    |
| NKX-2677    |    | 1.272 | 9.367  | 1.129      | 0.170    |
| NKX-2677-P1 |    | 1.315 | 10.389 | 1.223      | 0.117    |
| NKX-2677-P2 |    | 0.775 | 11.800 | 1.364      | 0.026    |
| NKX-2700    |    | 1.650 | 10.301 | 1.101      | 0.200    |
| NKX-2700-P1 |  | 1.410 | 11.515 | 1.211      | 0.104    |
| NKX-2700-P2 |  | 0.902 | 13.075 | 1.357      | 0.028    |
| NKX-2833    |  | 1.725 | 9.024  | 1.070      | 0.372    |
| NKX-2883-P1 |  | 1.382 | 10.270 | 1.195      | 0.200    |
| NKX-2883-P2 |  | 1.102 | 12.187 | 1.323      | 0.077    |
| NKX-2883-Q1 |  | 1.424 | 12.587 | 1.208      | 0.118    |
| NKX-2883-Q2 |  | 0.953 | 16.245 | 1.345      | 0.018    |

**Table 11S** Electron density difference plots of electronic transition  $S_0 \rightarrow S_1$  for each coumarin dyes performed in ethanol solution using the PBE0 functional with 6-31G(d,p) basis set.  $L$  is the electron transfer distance ( $\text{\AA}$ );  $\Delta e$  is the fraction of electron exchange ( $|e^-|$ ),  $\Omega$  is overlaps between the regions of density depletion and increment. (Isovalue:  $4 \times 10^{-4} e \text{ au}^{-3}$ )

| Molecule    | picture                                                                             | $f$   | $L$ (Ang) | $\Delta e$ | $\Omega$ |
|-------------|-------------------------------------------------------------------------------------|-------|-----------|------------|----------|
| NKX-2311    | 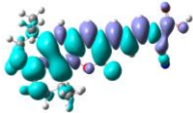   | 1.626 | 4.549     | 1.036      | 0.422    |
| NKX-2677    |    | 1.407 | 9.503     | 1.136      | 0.151    |
| NKX-2677-P1 |    | 1.472 | 10.42     | 1.220      | 0.108    |
| NKX-2677-P2 |    | 0.911 | 11.715    | 1.352      | 0.027    |
| NKX-2700    |   | 1.825 | 10.514    | 1.101      | 0.177    |
| NKX-2700-P1 |  | 1.575 | 11.579    | 1.211      | 0.094    |
| NKX-2700-P2 |  | 1.080 | 13.000    | 1.331      | 0.027    |
| NKX-2833    |  | 1.897 | 9.078     | 1.059      | 0.364    |
| NKX-2883-P1 |  | 1.568 | 10.228    | 1.174      | 0.195    |
| NKX-2883-P2 |  | 1.371 | 12.026    | 1.291      | 0.085    |
| NKX-2883-Q1 |  | 1.698 | 12.510    | 1.174      | 0.120    |
| NKX-2883-Q2 |  | 1.430 | 15.691    | 1.304      | 0.040    |

**Table 12S** Electron density difference plots of electron transitions with oscillation strength larger than 0.1 for all dyes using M062X functional

| NKX-2311                                                                            |                                                                                     |                                                                                     |                                                                                     |                                                                                      |                                                                                   |  |  |  |  |  |  |
|-------------------------------------------------------------------------------------|-------------------------------------------------------------------------------------|-------------------------------------------------------------------------------------|-------------------------------------------------------------------------------------|--------------------------------------------------------------------------------------|-----------------------------------------------------------------------------------|--|--|--|--|--|--|
| 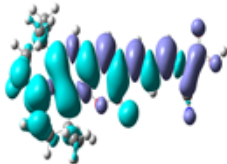   | $L = 5.164 \text{ Ang}$<br>$\Delta e = 1.024$<br>$\Omega = 0.376$<br>$f = 1.774$    |    | $L = 4.857 \text{ Ang}$<br>$\Delta e = 0.812$<br>$\Omega = 0.427$<br>$f = 0.180$    |                                                                                      |                                                                                   |  |  |  |  |  |  |
|    | $L = 0.470 \text{ Ang}$<br>$\Delta e = 0.765$<br>$\Omega = 0.880$<br>$f = 0.110$    |    | $L = 3.144 \text{ Ang}$<br>$\Delta e = 0.754$<br>$\Omega = 0.727$<br>$f = 0.147$    |                                                                                      |                                                                                   |  |  |  |  |  |  |
|    | $L = 1.062 \text{ Ang}$<br>$\Delta e = 0.514$<br>$\Omega = 0.877$<br>$f = 0.314$    |    | $L = 4.041 \text{ Ang}$<br>$\Delta e = 0.445$<br>$\Omega = 0.599$<br>$f = 0.101$    |                                                                                      |                                                                                   |  |  |  |  |  |  |
|   | $L = 8.667 \text{ Ang}$<br>$\Delta e = 1.110$<br>$\Omega = 0.026$<br>$f = 0.116$    |   | $L = 1.096 \text{ Ang}$<br>$\Delta e = 0.674$<br>$\Omega = 0.887$<br>$f = 0.139$    |                                                                                      |                                                                                   |  |  |  |  |  |  |
| NKX-2677                                                                            |                                                                                     |                                                                                     |                                                                                     |                                                                                      |                                                                                   |  |  |  |  |  |  |
|  | $L = 9.748 \text{ Ang}$<br>$\Delta e = 1.118$<br>$\Omega = 0.137$<br>$f = 1.851$    |  | $L = 10.449 \text{ Ang}$<br>$\Delta e = 1.149$<br>$\Omega = 0.110$<br>$f = 2.067$   |  | $L = 11.244 \text{ Ang}$<br>$\Delta e = 1.197$<br>$\Omega = 0.059$<br>$f = 1.789$ |  |  |  |  |  |  |
|  | $L = 5.257 \text{ Ang}$<br>$\Delta e = 0.825$<br>$\Omega = 0.751$<br>$f = 0.177$    |  | $L = 8.898 \text{ Ang}$<br>$\Delta e = 0.941$<br>$\Omega = 0.320$<br>$f = 0.277$    |  | $L = 8.624 \text{ Ang}$<br>$\Delta e = 0.900$<br>$\Omega = 0.268$<br>$f = 0.678$  |  |  |  |  |  |  |
|  | $L = 7.423 \text{ Ang}$<br>$\Delta e = 0.806$<br>$\Omega = 0.504$<br>$f = 0.180$    |  | $L = 7.492 \text{ Ang}$<br>$\Delta e = 0.700$<br>$\Omega = 0.517$<br>$f = 0.104$    |  | $L = 7.404 \text{ Ang}$<br>$\Delta e = 0.734$<br>$\Omega = 0.191$<br>$f = 0.446$  |  |  |  |  |  |  |
|  | $L = 6.699 \text{ Ang}$<br>$\Delta e = 0.6270$<br>$\Omega = 0.5899$<br>$f = 0.1317$ |  | $L = 7.192 \text{ Ang}$<br>$\Delta e = 0.5873$<br>$\Omega = 0.5707$<br>$f = 0.1339$ |                                                                                      |                                                                                   |  |  |  |  |  |  |

|                                                                                   |                                                                  |                                                                                   |                                                                  |
|-----------------------------------------------------------------------------------|------------------------------------------------------------------|-----------------------------------------------------------------------------------|------------------------------------------------------------------|
| 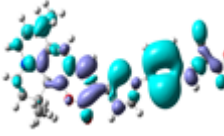 | $L=3.737$ Ang<br>$\Delta e=0.592$<br>$\Omega=0.808$<br>$f=0.112$ |  | $L=4.753$ Ang<br>$\Delta e=0.483$<br>$\Omega=0.786$<br>$f=0.175$ |
|  | $L=4.001$ Ang<br>$\Delta e=0.515$<br>$\Omega=0.817$<br>$f=0.213$ |  | $L=5.057$ Ang<br>$\Delta e=0.565$<br>$\Omega=0.654$<br>$f=0.557$ |
|  | $L=1.158$ Ang<br>$\Delta e=0.553$<br>$\Omega=0.930$<br>$f=0.320$ |                                                                                   |                                                                  |

| NKX-2700                                                                            | NKX-2700-P1                                                                         | NKX-2700-P2                                                                           |
|-------------------------------------------------------------------------------------|-------------------------------------------------------------------------------------|---------------------------------------------------------------------------------------|
| 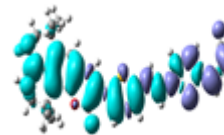   |    |    |
| $L=10.995$ Ang<br>$\Delta e=1.060$<br>$\Omega=0.143$<br>$f=2.347$                   | $L=11.841$ Ang<br>$\Delta e=1.166$<br>$\Omega=0.076$<br>$f=2.194$                   | $L=12.812$ Ang<br>$\Delta e=1.155$<br>$\Omega=0.052$<br>$f=2.178$                     |
|   |   |   |
| $L=6.517$ Ang<br>$\Delta e=0.803$<br>$\Omega=0.718$<br>$f=0.170$                    | $L=8.254$ Ang<br>$\Delta e=0.873$<br>$\Omega=0.516$<br>$f=0.162$                    | $L=11.418$ Ang<br>$\Delta e=0.899$<br>$\Omega=0.145$<br>$f=0.578$                     |
|  |  |  |
| $L=8.829$ Ang<br>$\Delta e=0.813$<br>$\Omega=0.481$<br>$f=0.202$                    | $L=10.661$ Ang<br>$\Delta e=0.931$<br>$\Omega=0.166$<br>$f=0.334$                   | $L=10.746$ Ang<br>$\Delta e=0.663$<br>$\Omega=0.257$<br>$f=0.155$                     |
|  |  |                                                                                       |
| $L=2.078$ Ang<br>$\Delta e=0.515$<br>$\Omega=902$<br>$f=0.117$                      | $L=8.705$ Ang<br>$\Delta e=0.712$<br>$\Omega=0.181$<br>$f=0.132$                    |                                                                                       |
|  |  |                                                                                       |
| $L=6.798$ Ang<br>$\Delta e=0.548$<br>$\Omega=0.611$<br>$f=0.174$                    | $L=7.121$ Ang<br>$\Delta e=0.802$<br>$\Omega=0.391$<br>$f=0.373$                    |                                                                                       |
|  |                                                                                     |                                                                                       |
| $L=0.750$ Ang<br>$\Delta e=0.555$<br>$\Omega=0.938$<br>$f=0.325$                    |                                                                                     |                                                                                       |

| NKX-2883                                                                                                                                                                                                                  | NKX-2883-P1                                                                                                                                                                                                                | NKX-2883-P2                                                                                                                                                                                                                |
|---------------------------------------------------------------------------------------------------------------------------------------------------------------------------------------------------------------------------|----------------------------------------------------------------------------------------------------------------------------------------------------------------------------------------------------------------------------|----------------------------------------------------------------------------------------------------------------------------------------------------------------------------------------------------------------------------|
| 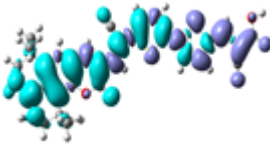 <p> <math>L= 9.403 \text{ Ang}</math><br/> <math>\Delta e=0.100</math><br/> <math>\Omega= 0.350</math><br/> <math>f=2.255</math> </p>   |  <p> <math>L=10.405\text{Ang}</math><br/> <math>\Delta e=1.120</math><br/> <math>\Omega= 0.192</math><br/> <math>f=2.001</math> </p>      |  <p> <math>L=11.182 \text{ Ang}</math><br/> <math>\Delta e=1.144</math><br/> <math>\Omega=0.168</math><br/> <math>f=2.024</math> </p>   |
|  <p> <math>L= 6.432 \text{ Ang}</math><br/> <math>\Delta e= 0.838</math><br/> <math>\Omega= 0.723</math><br/> <math>f=0.144</math> </p>  |  <p> <math>L=7.947 \text{ Ang}</math><br/> <math>\Delta e=0.876</math><br/> <math>\Omega= 0.545</math><br/> <math>f=0.203</math> </p>     |  <p> <math>L=10.673 \text{ Ang}</math><br/> <math>\Delta e=0.830</math><br/> <math>\Omega= 0.242</math><br/> <math>f=0.242</math> </p>  |
|  <p> <math>L= 7.291 \text{ Ang}</math><br/> <math>\Delta e= 0.828</math><br/> <math>\Omega= 0.551</math><br/> <math>f=0.105</math> </p>  |  <p> <math>L=8.937 \text{ Ang}</math><br/> <math>\Delta e=0.841</math><br/> <math>\Omega= 0.306</math><br/> <math>f=0.206</math> </p>     |  <p> <math>L=11.191\text{Ang}</math><br/> <math>\Delta e=0.811</math><br/> <math>\Omega= 0.172</math><br/> <math>f=0.376</math> </p>    |
|  <p> <math>L= 0.250 \text{ Ang}</math><br/> <math>\Delta e= 0.625</math><br/> <math>\Omega= 0.978</math><br/> <math>f=0.194</math> </p>  |  <p> <math>L=6.353 \text{ Ang}</math><br/> <math>\Delta e=0.649</math><br/> <math>\Omega= 0.680</math><br/> <math>f=0.295</math> </p>     |  <p> <math>L=8.224 \text{ Ang}</math><br/> <math>\Delta e=0.704</math><br/> <math>\Omega= 0.513</math><br/> <math>f=0.0.240</math> </p> |
|  <p> <math>L= 8.743 \text{ Ang}</math><br/> <math>\Delta e=0.952</math><br/> <math>\Omega= 0.130</math><br/> <math>f=0.337</math> </p>  |                                                                                                                                                                                                                            |                                                                                                                                                                                                                            |
| NKX-2883-Q1                                                                                                                                                                                                               |                                                                                                                                                                                                                            | NKX-2883-Q2                                                                                                                                                                                                                |
|  <p> <math>L=11.782 \text{ Ang}</math><br/> <math>\Delta e=1.050</math><br/> <math>\Omega= 0.216</math><br/> <math>f=2.270</math> </p> |  <p> <math>L=12.934 \text{ Ang}</math><br/> <math>\Delta e=1.073</math><br/> <math>\Omega= 0.241</math><br/> <math>f=2.117</math> </p> |                                                                                                                                                                                                                            |
|  <p> <math>L=9.596 \text{ Ang}</math><br/> <math>\Delta e=0.872</math><br/> <math>\Omega= 0.495</math><br/> <math>f=0.199</math> </p>  |  <p> <math>L=11.184 \text{ Ang}</math><br/> <math>\Delta e=0.816</math><br/> <math>\Omega= 0.472</math><br/> <math>f=0.607</math> </p> |                                                                                                                                                                                                                            |
|  <p> <math>L=10.275 \text{ Ang}</math><br/> <math>\Delta e=0.794</math><br/> <math>\Omega= 0.349</math><br/> <math>f=0.227</math> </p> |  <p> <math>L=13.666 \text{ Ang}</math><br/> <math>\Delta e=0.843</math><br/> <math>\Omega= 0.236</math><br/> <math>f=0.226</math> </p> |                                                                                                                                                                                                                            |
|  <p> <math>L=5.455\text{ng}</math><br/> <math>\Delta e= 0.649</math><br/> <math>\Omega= 0.825</math><br/> <math>f=0.171</math> </p>    |  <p> <math>L=5.586 \text{ Ang}</math><br/> <math>\Delta e=0.601</math><br/> <math>\Omega= 0.750</math><br/> <math>f=0.102</math> </p>  |                                                                                                                                                                                                                            |

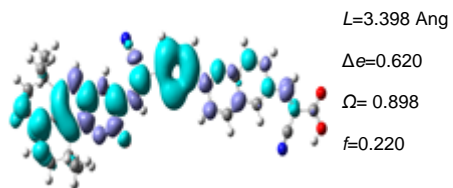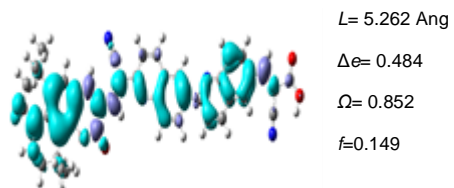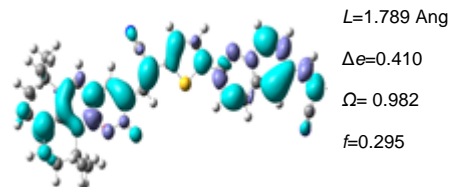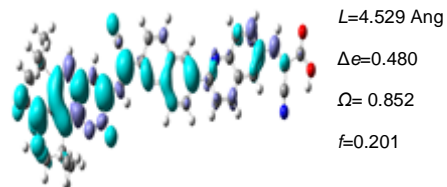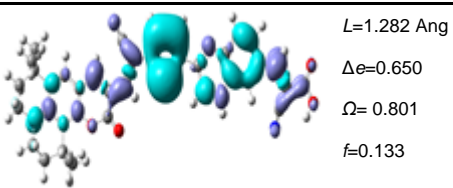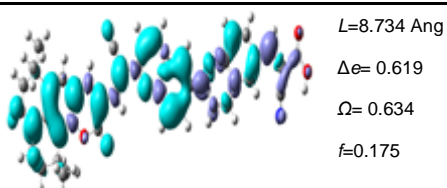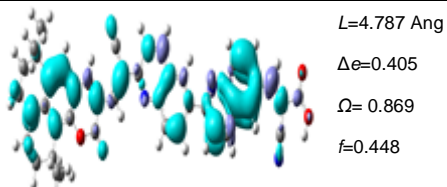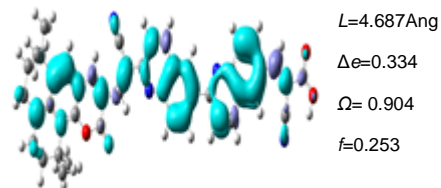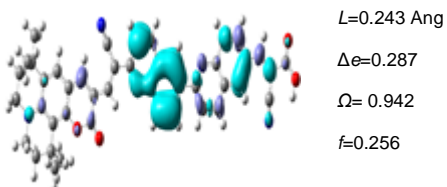

**Table 13S** Electron density difference plots of electron transitions with oscillation strength larger than 0.1 for all dyes using B3LYP functional

| <b>NKX-2311</b>                                                                     |                                                                                  |                                                                                     |                                                                                   |                                                                                       |                                                                                   |
|-------------------------------------------------------------------------------------|----------------------------------------------------------------------------------|-------------------------------------------------------------------------------------|-----------------------------------------------------------------------------------|---------------------------------------------------------------------------------------|-----------------------------------------------------------------------------------|
| 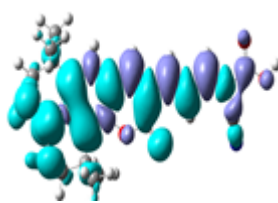   | $L = 4.514 \text{ Ang}$<br>$\Delta e = 1.034$<br>$\Omega = 0.425$<br>$f = 1.553$ |    | $L = 4.321 \text{ Ang}$<br>$\Delta e = 0.846$<br>$\Omega = 0.583$<br>$f = 0.138$  |                                                                                       |                                                                                   |
|    | $L = 4.473 \text{ Ang}$<br>$\Delta e = 0.764$<br>$\Omega = 0.504$<br>$f = 0.173$ |    | $L = 1.265 \text{ Ang}$<br>$\Delta e = 0.600$<br>$\Omega = 0.897$<br>$f = 0.504$  |                                                                                       |                                                                                   |
|    | $L = 2.013 \text{ Ang}$<br>$\Delta e = 0.634$<br>$\Omega = 0.824$<br>$f = 0.142$ |                                                                                     |                                                                                   |                                                                                       |                                                                                   |
| <b>NKX-2677</b>                                                                     |                                                                                  | <b>NKX-2677-P1</b>                                                                  |                                                                                   | <b>NKX-2677-P2</b>                                                                    |                                                                                   |
|  | $L = 9.367 \text{ Ang}$<br>$\Delta e = 1.129$<br>$\Omega = 0.170$<br>$f = 1.272$ |  | $L = 10.389 \text{ Ang}$<br>$\Delta e = 1.223$<br>$\Omega = 0.117$<br>$f = 1.315$ |  | $L = 11.800 \text{ Ang}$<br>$\Delta e = 1.364$<br>$\Omega = 0.026$<br>$f = 0.775$ |
|  | $L = 5.889 \text{ Ang}$<br>$\Delta e = 0.819$<br>$\Omega = 0.704$<br>$f = 0.701$ |  | $L = 6.542 \text{ Ang}$<br>$\Delta e = 0.883$<br>$\Omega = 0.644$<br>$f = 0.874$  |  | $L = 8.186 \text{ Ang}$<br>$\Delta e = 1.144$<br>$\Omega = 0.242$<br>$f = 0.320$  |
|  | $L = 5.022 \text{ Ang}$<br>$\Delta e = 0.811$<br>$\Omega = 0.780$<br>$f = 0.117$ |  | $L = 3.543 \text{ Ang}$<br>$\Delta e = 0.606$<br>$\Omega = 0.857$<br>$f = 0.141$  |  | $L = 8.110 \text{ Ang}$<br>$\Delta e = 1.038$<br>$\Omega = 0.358$<br>$f = 0.619$  |
|                                                                                     |                                                                                  |  | $L = 4.254 \text{ Ang}$<br>$\Delta e = 0.631$<br>$\Omega = 0.818$<br>$f = 0.123$  |  | $L = 10.190 \text{ Ang}$<br>$\Delta e = 1.168$<br>$\Omega = 0.029$<br>$f = 0.193$ |
|                                                                                     |                                                                                  |                                                                                     |                                                                                   |  | $L = 9.373 \text{ Ang}$<br>$\Delta e = 0.903$<br>$\Omega = 0.197$<br>$f = 0.205$  |

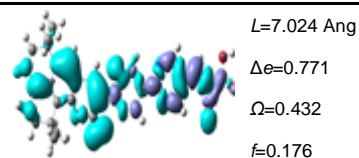

**NKX-2700**

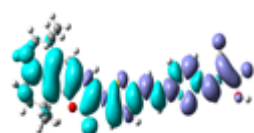

$L=10.301$  Ang  
 $\Delta e=1.101$   
 $\Omega=0.200$   
 $f=1.650$

**NKX-2700-P1**

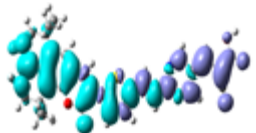

$L=11.515$  Ang  
 $\Delta e=1.211$   
 $\Omega=0.104$   
 $f=1.410$

**NKX-2700-P2**

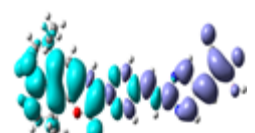

$L=13.075$  Ang  
 $\Delta e=1.357$   
 $\Omega=0.028$   
 $f=0.902$

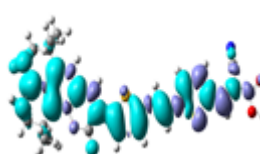

$L=7.801$  Ang  
 $\Delta e=0.818$   
 $\Omega=0.605$   
 $f=0.831$

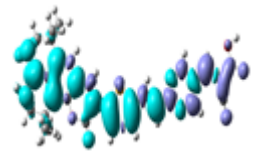

$L=9.905$  Ang  
 $\Delta e=0.905$   
 $\Omega=0.328$   
 $f=0.992$

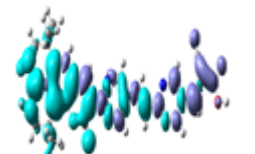

$L=10.093$  Ang  
 $\Delta e=0.925$   
 $\Omega=0.340$   
 $f=1.399$

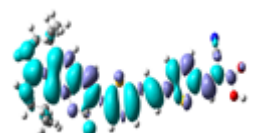

$L=5.660$  Ang  
 $\Delta e=0.809$   
 $\Omega=0.774$   
 $f=0.103$

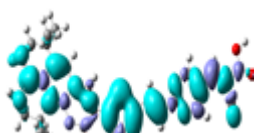

$L=4.886$  Ang  
 $\Delta e=0.681$   
 $\Omega=0.842$   
 $f=0.115$

**NKX-2883**

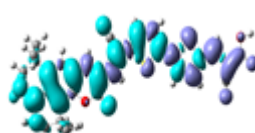

$L=9.024$  Ang  
 $\Delta e=1.070$   
 $\Omega=0.372$   
 $f=1.725$

**NKX-2883-P1**

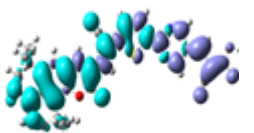

$L=10.270$  Ang  
 $\Delta e=1.195$   
 $\Omega=0.198$   
 $f=1.382$

**NKX-2883-P2**

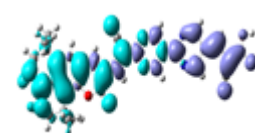

$L=12.187$  Ang  
 $\Delta e=1.323$   
 $\Omega=0.077$   
 $f=1.102$

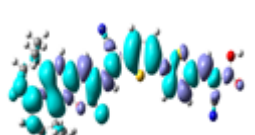

$L=5.232$  Ang  
 $\Delta e=0.855$   
 $\Omega=0.804$   
 $f=0.491$

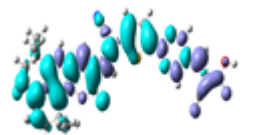

$L=6.937$  Ang  
 $\Delta e=0.950$   
 $\Omega=0.643$   
 $f=0.664$

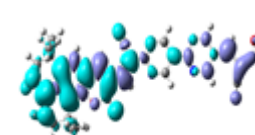

$L=7.221$  Ang  
 $\Delta e=0.983$   
 $\Omega=0.548$   
 $f=0.909$

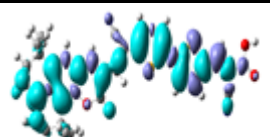

$L=6.188$  Ang  
 $\Delta e=0.808$   
 $\Omega=0.735$   
 $f=0.149$

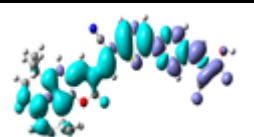

$L=8.902$  Ang  
 $\Delta e=0.902$   
 $\Omega=0.342$   
 $f=0.233$

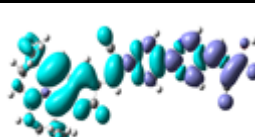

$L=12.127$  Ang  
 $\Delta e=1.020$   
 $\Omega=0.061$   
 $f=0.365$

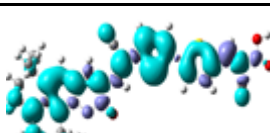

$L=5.555$  Ang  
 $\Delta e=0.696$   
 $\Omega=0.743$   
 $f=0.100$

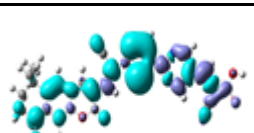

$L=5.413$  Ang  
 $\Delta e=0.766$   
 $\Omega=0.628$   
 $f=0.212$

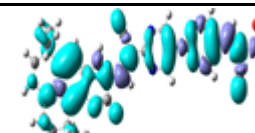

$L=4.723$  Ang  
 $\Delta e=0.698$   
 $\Omega=0.823$   
 $f=0.146$

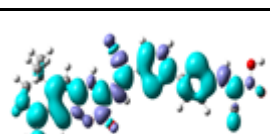

$L=2.030$  Ang  
 $\Delta e=0.701$   
 $\Omega=0.930$   
 $f=0.143$

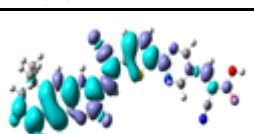

$L=4.933$  Ang  
 $\Delta e=0.862$   
 $\Omega=0.714$   
 $f=0.179$

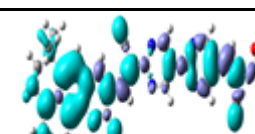

$L=6.885$  Ang  
 $\Delta e=0.702$   
 $\Omega=0.674$   
 $f=0.166$



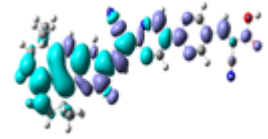

$L=6.705\text{Ang}$

$\Delta e=0.943$

$\Omega=0.520$

$f=0.116$

**NKX-2883-Q1**

**NKX-2883-Q2**

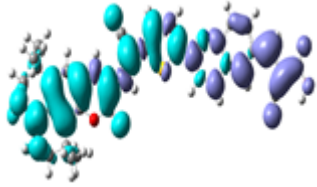

$L=12.587\text{ Ang}$

$\Delta e=1.208$

$\Omega=0.118$

$f=1.424$

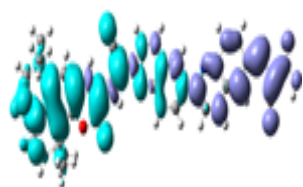

$L=16.245\text{Ang}$

$\Delta e=1.345$

$\Omega=0.018$

$f=0.953$

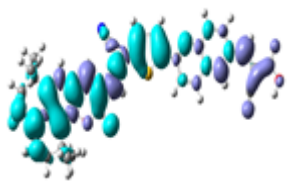

$L=7.028\text{ Ang}$

$\Delta e=0.964$

$\Omega=0.689$

$f=0.834$

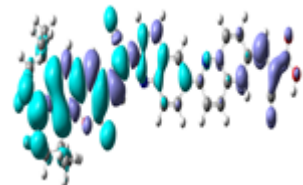

$L=6.920\text{ Ang}$

$\Delta e=0.972$

$\Omega=0.600$

$f=1.126$

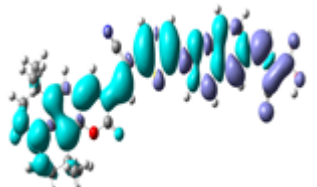

$L=10.173\text{ Ang}$

$\Delta e=0.952$

$\Omega=0.320$

$f=0.217$

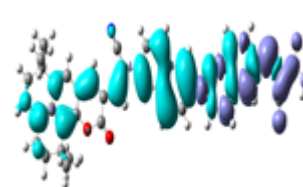

$L=9.780\text{ Ang}$

$\Delta e=0.964$

$\Omega=0.317$

$f=0.413$

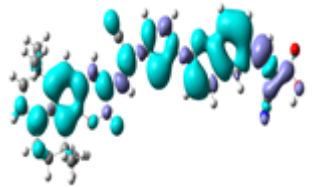

$L=6.569\text{ Ang}$

$\Delta e=0.676$

$\Omega=0.728$

$f=0.115$

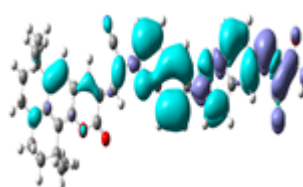

$L=7.652\text{ Ang}$

$\Delta e=0.795$

$\Omega=0.504$

$f=0.129$

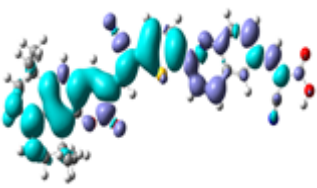

$L=7.258\text{ Ang}$

$\Delta e=0.818$

$\Omega=0.642$

$f=0.132$

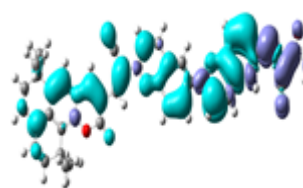

$L=8.357\text{ Ang}$

$\Delta e=0.834$

$\Omega=0.564$

$f=0.320$

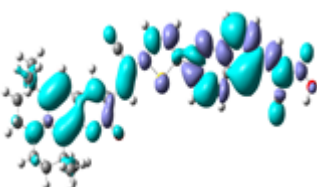

$L=3.030\text{ Ang}$

$\Delta e=0.806$

$\Omega=0.807$

$f=0.251$

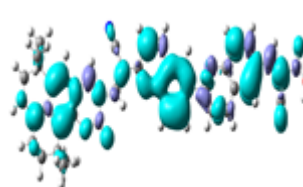

$L=3.196\text{ Ang}$

$\Delta e=0.616$

$\Omega=0.903$

$f=0.192$

**Table 14S** The electron density difference plots of electron transitions of all systems using PBE0 functional.

| NKX-2311                                                                            |                                                                                  |                                                                                     |                                                                                   |                                                                                       |                                                                                   |
|-------------------------------------------------------------------------------------|----------------------------------------------------------------------------------|-------------------------------------------------------------------------------------|-----------------------------------------------------------------------------------|---------------------------------------------------------------------------------------|-----------------------------------------------------------------------------------|
| 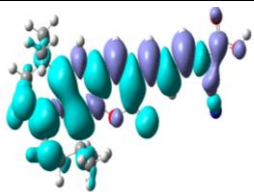   | $L = 4.549 \text{ Ang}$<br>$\Delta e = 1.363$<br>$\Omega = 0.422$<br>$f = 1.626$ |    | $L = 4.254 \text{ Ang}$<br>$\Delta e = 0.854$<br>$\Omega = 0.593$<br>$f = 0.111$  |                                                                                       |                                                                                   |
|    | $L = 4.464 \text{ Ang}$<br>$\Delta e = 0.777$<br>$\Omega = 0.492$<br>$f = 0.177$ |    | $L = 0.654 \text{ Ang}$<br>$\Delta e = 0.631$<br>$\Omega = 0.892$<br>$f = 0.221$  |                                                                                       |                                                                                   |
|    | $L = 0.539 \text{ Ang}$<br>$\Delta e = 0.600$<br>$\Omega = 0.927$<br>$f = 0.345$ |    | $L = 1.433 \text{ Ang}$<br>$\Delta e = 0.747$<br>$\Omega = 0.850$<br>$f = 0.125$  |                                                                                       |                                                                                   |
|   | $L = 1.674 \text{ Ang}$<br>$\Delta e = 0.680$<br>$\Omega = 0.846$<br>$f = 0.118$ |                                                                                     |                                                                                   |                                                                                       |                                                                                   |
| NKX-2677                                                                            |                                                                                  | NKX-2677-P1                                                                         |                                                                                   | NKX-2677-P2                                                                           |                                                                                   |
|  | $L = 9.503 \text{ Ang}$<br>$\Delta e = 1.136$<br>$\Omega = 0.151$<br>$f = 1.407$ |  | $L = 10.423 \text{ Ang}$<br>$\Delta e = 1.220$<br>$\Omega = 0.108$<br>$f = 1.472$ |  | $L = 11.715 \text{ Ang}$<br>$\Delta e = 1.352$<br>$\Omega = 0.027$<br>$f = 0.911$ |
|  | $L = 5.947 \text{ Ang}$<br>$\Delta e = 0.809$<br>$\Omega = 0.694$<br>$f = 0.614$ |  | $L = 5.941 \text{ Ang}$<br>$\Delta e = 0.889$<br>$\Omega = 0.684$<br>$f = 0.742$  |  | $L = 7.888 \text{ Ang}$<br>$\Delta e = 0.947$<br>$\Omega = 0.380$<br>$f = 0.933$  |
|  | $L = 5.228 \text{ Ang}$<br>$\Delta e = 0.825$<br>$\Omega = 0.760$<br>$f = 0.130$ |  | $L = 3.466 \text{ Ang}$<br>$\Delta e = 0.642$<br>$\Omega = 0.847$<br>$f = 0.141$  |  | $L = 9.363 \text{ Ang}$<br>$\Delta e = 0.877$<br>$\Omega = 0.176$<br>$f = 0.421$  |
|                                                                                     |                                                                                  |  | $L = 1.165 \text{ Ang}$<br>$\Delta e = 0.697$<br>$\Omega = 0.931$<br>$f = 0.105$  |  | $L = 4.912 \text{ Ang}$<br>$\Delta e = 0.774$<br>$\Omega = 0.624$<br>$f = 0.108$  |

|                                                                                     |                                                                                     |                                                                                       |
|-------------------------------------------------------------------------------------|-------------------------------------------------------------------------------------|---------------------------------------------------------------------------------------|
| 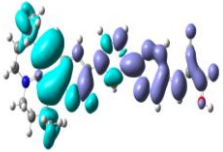   |                                                                                     | $L=8.749 \text{ Ang}$<br>$\Delta e=1.087$<br>$\Omega=0.099$<br>$f=0.106$              |
| <b>NKX-2700</b>                                                                     | <b>NKX-2700-P1</b>                                                                  | <b>NKX-2700-P2</b>                                                                    |
|    |    |    |
| $L=10.514 \text{ Ang}$<br>$\Delta e=1.101$<br>$\Omega=0.177$<br>$f=1.825$           | $L=11.579 \text{ Ang}$<br>$\Delta e=1.211$<br>$\Omega=0.094$<br>$f=1.575$           | $L=13.000 \text{ Ang}$<br>$\Delta e=1.331$<br>$\Omega=0.027$<br>$f=1.080$             |
|    |    |    |
| $L=7.949 \text{ Ang}$<br>$\Delta e=0.818$<br>$\Omega=0.583$<br>$f=0.711$            | $L=9.631 \text{ Ang}$<br>$\Delta e=0.892$<br>$\Omega=0.366$<br>$f=0.891$            | $L=9.817 \text{ Ang}$<br>$\Delta e=0.910$<br>$\Omega=0.360$<br>$f=1.305$              |
|    |    |    |
| $L=5.822 \text{ Ang}$<br>$\Delta e=0.828$<br>$\Omega=0.759$<br>$f=0.122$            | $L=9.490 \text{ Ang}$<br>$\Delta e=0.910$<br>$\Omega=0.387$<br>$f=0.111$            | $L=11.127 \text{ Ang}$<br>$\Delta e=0.906$<br>$\Omega=0.170$<br>$f=0.185$             |
|                                                                                     |                                                                                     |   |
|                                                                                     |                                                                                     | $L=8.084 \text{ Ang}$<br>$\Delta e=0.659$<br>$\Omega=0.526$<br>$f=0.129$              |
| <b>NKX-2883</b>                                                                     | <b>NKX-2883-P1</b>                                                                  | <b>NKX-2883-P2</b>                                                                    |
|  |  |  |
| $L=9.078 \text{ Ang}$<br>$\Delta e=1.059$<br>$\Omega=0.364$<br>$f=1.897$            | $L=10.228 \text{ Ang}$<br>$\Delta e=1.174$<br>$\Omega=0.195$<br>$f=1.568$           | $L=12.026 \text{ Ang}$<br>$\Delta e=1.291$<br>$\Omega=0.085$<br>$f=1.371$             |
|  |  |  |
| $L=5.526 \text{ Ang}$<br>$\Delta e=0.876$<br>$\Omega=0.778$<br>$f=0.361$            | $L=6.860 \text{ Ang}$<br>$\Delta e=0.958$<br>$\Omega=0.637$<br>$f=0.501$            | $L=7.518 \text{ Ang}$<br>$\Delta e=0.992$<br>$\Omega=0.528$<br>$f=0.653$              |
|  |  |  |
| $L=5.994 \text{ Ang}$<br>$\Delta e=0.816$<br>$\Omega=0.739$<br>$f=0.175$            | $L=8.567 \text{ Ang}$<br>$\Delta e=0.922$<br>$\Omega=0.368$<br>$f=0.284$            | $L=12.256 \text{ Ang}$<br>$\Delta e=0.991$<br>$\Omega=0.063$<br>$f=0.468$             |
|  |  |  |
| $L=6.286 \text{ Ang}$<br>$\Delta e=0.659$<br>$\Omega=0.697$<br>$f=0.108$            | $L=4.763 \text{ Ang}$<br>$\Delta e=0.834$<br>$\Omega=0.656$<br>$f=0.254$            | $L=7.782 \text{ Ang}$<br>$\Delta e=0.818$<br>$\Omega=0.462$<br>$f=0.160$              |

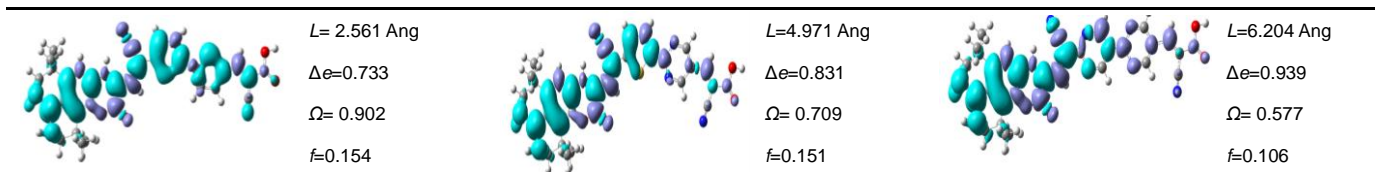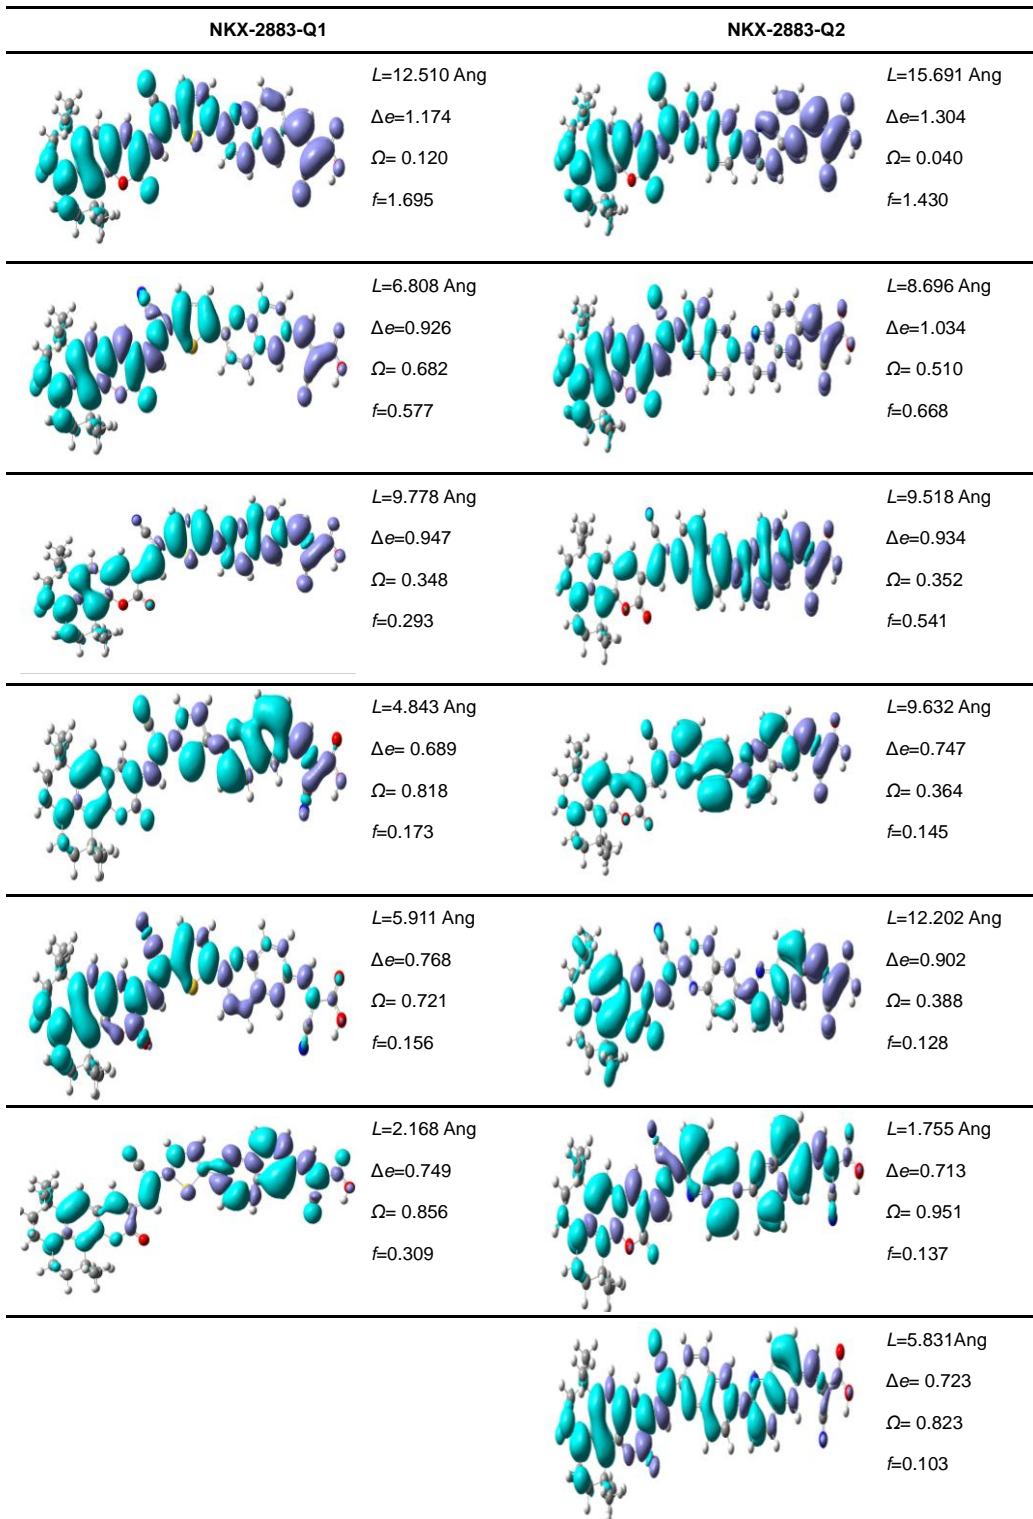

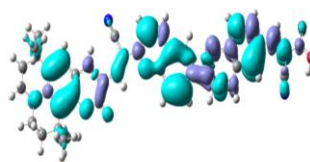

$L=4.656$  Ang

$\Delta e=0.6509$

$\Omega=0.828$

$f=0.273$

---

**Table 15S** Calculated HOMO, LUMO energy levels (eV) of all sensitizers and the HOMO, LUMO energy levels (eV) of the donor (coumarin343) and the acceptor (conjugated  $\pi$ -spacer and anchoring group) fragments of all sensitizer obtained by B3LYP functional

| molecule     | $\epsilon_{\text{LUMO}}$ | $\Delta\epsilon_{\text{HOMO-LUMO}}$ | $\epsilon_{\text{HOMO}}$ |
|--------------|--------------------------|-------------------------------------|--------------------------|
| Coumarin343  | -1.626                   |                                     | -5.267                   |
| frag-2311    | -2.752                   |                                     | -7.256                   |
| frag-2677    | -2.890                   |                                     | -5.967                   |
| frag-2677-P1 | -3.054                   |                                     | -6.546                   |
| frag-2677-P2 | -3.184                   |                                     | -6.586                   |
| frag-2700    | -2.904                   |                                     | -5.660                   |
| frag-2700-P1 | -3.081                   |                                     | -6.083                   |
| frag-2700-P2 | -3.172                   |                                     | -6.569                   |
| frag-2883    | -3.066                   |                                     | -5.979                   |
| frag-2883-P1 | -3.207                   |                                     | -6.460                   |
| frag-2883-P2 | -3.290                   |                                     | -7.084                   |
| frag-2883-Q1 | -3.065                   |                                     | -6.193                   |
| frag-2883-Q2 | -3.011                   |                                     | -6.297                   |
| NKX-2311     | -2.693                   | 2.614                               | -5.307                   |
| NKX-2677     | -2.878                   | 2.177                               | -5.055                   |
| NKX-2677-P1  | -2.963                   | 2.182                               | -5.145                   |
| NKX-2677-P2  | -3.099                   | 2.192                               | -5.291                   |
| NKX-2700     | -2.896                   | 2.071                               | -4.967                   |
| NKX-2700-P1  | -3.049                   | 2.010                               | -5.059                   |
| NKX-2700-P2  | -3.110                   | 2.143                               | -5.253                   |
| NKX-2883     | -3.011                   | 2.150                               | -5.161                   |
| NKX-2883-P1  | -3.125                   | 2.113                               | -5.238                   |
| NKX-2883- P2 | -3.182                   | 2.200                               | -5.382                   |
| NKX-2883-Q1  | -3.017                   | 2.164                               | -5.180                   |
| NKX-2883- Q2 | -2.975                   | 2.305                               | -5.280                   |

**Table 16S** Calculated HOMO, LUMO energy levels (eV) of all sensitizers and the HOMO, LUMO energy levels (eV) of the donor (coumarin343) and the acceptor (conjugated  $\pi$ -spacer and anchoring group) fragments of all sensitizer obtained by M062X functional

| molecule     | $\epsilon_{\text{LUMO}}$ | $\Delta\epsilon_{\text{HOMO-LUMO}}$ | $\epsilon_{\text{HOMO}}$ |
|--------------|--------------------------|-------------------------------------|--------------------------|
| Coumarin343  | -0.758                   |                                     | -6.571                   |
| frag-2311    | -1.749                   |                                     | -8.777                   |
| frag-2677    | -2.051                   |                                     | -7.221                   |
| frag-2677-P1 | -2.202                   |                                     | -7.870                   |
| frag-2677-P2 | -2.302                   |                                     | -8.207                   |
| frag-2700    | -2.246                   |                                     | -6.802                   |
| frag-2700-P1 | -2.251                   |                                     | -7.37                    |
| frag-2700-P2 | -2.311                   |                                     | -7.945                   |
| frag-2883    | -2.219                   |                                     | -7.186                   |
| frag-2883-P1 | -2.360                   |                                     | -7.727                   |
| frag-2883-P2 | -2.423                   |                                     | -8.393                   |
| frag-2883-Q1 | -2.245                   |                                     | -7.441                   |
| frag-2883-Q2 | -2.201                   |                                     | -7.555                   |
| NKX-2311     | -1.941                   | 4.503                               | -6.444                   |
| NKX-2677     | -2.132                   | 4.062                               | -6.194                   |
| NKX-2677-P1  | -2.144                   | 4.100                               | -6.244                   |
| NKX-2677-P2  | -2.384                   | 4.001                               | -6.385                   |
| NKX-2700     | -2.203                   | 3.889                               | -6.091                   |
| NKX-2700-P1  | -2.309                   | 3.854                               | -6.164                   |
| NKX-2700-P2  | -2.398                   | 3.960                               | -6.358                   |
| NKX-2883     | -2.337                   | 3.963                               | -6.2996                  |
| NKX-2883-P1  | -2.393                   | 3.924                               | -6.3162                  |
| NKX-2883-P2  | -2.492                   | 3.954                               | -6.4460                  |
| NKX-2883-Q1  | -2.356                   | 3.972                               | -6.3282                  |
| NKX-2883-Q2  | -2.301                   | 2.600                               | -6.3962                  |

**Table 17S** Molecular orbital composition (in %) of the highest occupied and two lowest unoccupied molecular orbital of the twelve coumarin sensitizers performed in ethanol solvent using B3LYP functional and the 6-31G(d,p) basis set.

| system      | orbital | Anchoring ligand | $\pi$ -linker | C343 |
|-------------|---------|------------------|---------------|------|
| NKX-2311    | HOMO    | 17               | 13            | 70   |
|             | LUMO    | 34               | 18            | 47   |
|             | LUMO+1  | 27               | 10            | 63   |
| NKX-2677    | HOMO    | 7                | 37            | 56   |
|             | LUMO    | 36               | 49            | 15   |
|             | LUMO+1  | 16               | 24            | 61   |
| NKX-2677-P1 | HOMO    | 4                | 32            | 64   |
|             | LUMO    | 42               | 45            | 13   |
|             | LUMO+1  | 16               | 19            | 66   |
| NKX-2677-P2 | HOMO    | 1                | 11            | 88   |
|             | LUMO    | 49               | 45            | 6    |
|             | LUMO+1  | 13               | 30            | 57   |
| NKX-2700    | HOMO    | 7                | 46            | 47   |
|             | LUMO    | 31               | 57            | 12   |
|             | LUMO+1  | 17               | 29            | 54   |
| NKX-2700-P1 | HOMO    | 5                | 36            | 59   |
|             | LUMO    | 41               | 50            | 10   |
|             | LUMO+1  | 19               | 28            | 53   |
| NKX-2700-P2 | HOMO    | 1                | 14            | 85   |
|             | LUMO    | 42               | 53            | 5    |
|             | LUMO+1  | 18               | 38            | 44   |
| NKX-2883    | HOMO    | 6                | 46            | 48   |
|             | LUMO    | 24               | 55            | 21   |
|             | LUMO+1  | 24               | 41            | 36   |
| NKX-2883-P1 | HOMO    | 2                | 38            | 60   |
|             | LUMO    | 33               | 52            | 15   |
|             | LUMO+1  | 22               | 37            | 41   |
| NKX-2883-P2 | HOMO    | 1                | 25            | 74   |
|             | LUMO    | 43               | 49            | 8    |
|             | LUMO+1  | 14               | 38            | 48   |
| NKX-2883-Q1 | HOMO    | 2                | 42            | 57   |
|             | LUMO    | 34               | 54            | 12   |
|             | LUMO+1  | 18               | 41            | 41   |
| NKX-2883-Q2 | HOMO    | 0                | 30            | 69   |
|             | LUMO    | 45               | 51            | 4    |
|             | LUMO+1  | 8                | 46            | 46   |



**Table 18S** Molecular orbital composition (in %) of the highest occupied and two lowest unoccupied molecular orbital of the twelve coumarin sensitizers performed in ethanol solvent using PBE0 functional and the 6-31G(d,p) basis set.

| system      | orbital | Anchoring ligand | $\pi$ -linker | C343 |
|-------------|---------|------------------|---------------|------|
| NKX-2311    | HOMO    | 16               | 13            | 70   |
|             | LUMO    | 34               | 19            | 47   |
|             | LUMO+1  | 27               | 10            | 63   |
| NKX-2677    | HOMO    | 6                | 36            | 58   |
|             | LUMO    | 36               | 49            | 14   |
|             | LUMO+1  | 16               | 24            | 60   |
| NKX-2677-P1 | HOMO    | 3                | 31            | 66   |
|             | LUMO    | 42               | 45            | 13   |
|             | LUMO+1  | 16               | 19            | 66   |
| NKX-2677-P2 | HOMO    | 1                | 10            | 89   |
|             | LUMO    | 49               | 46            | 6    |
|             | LUMO+1  | 14               | 30            | 56   |
| NKX-2700    | HOMO    | 6                | 45            | 49   |
|             | LUMO    | 32               | 57            | 11   |
|             | LUMO+1  | 17               | 29            | 53   |
| NKX-2700-P1 | HOMO    | 5                | 35            | 60   |
|             | LUMO    | 41               | 50            | 9    |
|             | LUMO+1  | 19               | 28            | 53   |
| NKX-2700-P2 | HOMO    | 1                | 14            | 86   |
|             | LUMO    | 41               | 54            | 5    |
|             | LUMO+1  | 18               | 38            | 43   |
| NKX-2883    | HOMO    | 5                | 45            | 50   |
|             | LUMO    | 24               | 55            | 21   |
|             | LUMO+1  | 25               | 40            | 35   |
| NKX-2883-P1 | HOMO    | 2                | 37            | 61   |
|             | LUMO    | 33               | 53            | 15   |
|             | LUMO+1  | 22               | 37            | 41   |
| NKX-2883-P2 | HOMO    | 1                | 24            | 75   |
|             | LUMO    | 43               | 50            | 8    |
|             | LUMO+1  | 14               | 38            | 47   |
| NKX-2883-Q1 | HOMO    | 1                | 40            | 58   |
|             | LUMO    | 34               | 55            | 11   |
|             | LUMO+1  | 18               | 41            | 41   |
| NKX-2883-Q2 | HOMO    | 0                | 30            | 70   |
|             | LUMO    | 44               | 52            | 4    |
|             | LUMO+1  | 8                | 47            | 45   |

**Table 19S** Calculated energy (a.u) of the oxidized coumarin dyes in ethanol solvent using PBE0 functional and the 6-31G(d,p) basis set

| <b>scheme</b> | <b>Dye<sup>+</sup></b> | <b>Dye<sup>+2</sup></b> | <b><math>\Delta G(aq)</math></b> |
|---------------|------------------------|-------------------------|----------------------------------|
| NKX-2311      | -1376.9660             | -1376.5874              | 10.3021                          |
| NKX-2677      | -2402.6491             | -2402.3104              | 9.2164                           |
| NKX-2677-P1   | -2113.9945             | -2113.6450              | 9.5102                           |
| NKX-2677-P2   | -1825.3309             | -1824.9602              | 10.0871                          |
| NKX-2700      | -2479.9639             | -2479.6372              | 8.8898                           |
| NKX-2700-P1   | -2191.3100             | -2190.9704              | 9.2409                           |
| NKX-2700-P2   | -1902.6453             | -1902.2898              | 9.6735                           |
| NKX-2883      | -2572.0934             | -2571.7594              | 9.0885                           |
| NKX-2883-P1   | -2283.4424             | -2283.0977              | 9.3796                           |
| NKX-2883-P2   | -1994.7868             | -1994.4233              | 9.8912                           |
| NKX-2883-Q1   | -2420.8846             | -2420.5487              | 9.1402                           |
| NKX-2883-Q2   | -2269.6788             | -2269.3410              | 9.1919                           |

**Table 20S** Calculated energy (a.u) of the oxidized coumarin dyes in ethanol solvent using B3LYP functional and the 6-31G(d,p) basis set

| scheme      | Dye <sup>+</sup> | Dye <sup>+2</sup> | $\Delta G_{(aq)}$ |
|-------------|------------------|-------------------|-------------------|
| NKX-2311    | -1378.6084       | -1378.3760        | 6.3235            |
| NKX-2677    | -2404.8416       | -2404.6343        | 5.6453            |
| NKX-2677-P1 | -2116.1605       | -2115.9437        | 5.9001            |
| NKX-2677-P2 | -1827.4690       | -1827.2324        | 6.4385            |
| NKX-2700    | -2482.2532       | -2482.0529        | 5.4527            |
| NKX-2700-P1 | -2193.5692       | -2193.3594        | 5.7076            |
| NKX-2700-P2 | -1904.8791       | -1904.6492        | 6.2550            |
| NKX-2883    | -2574.4878       | -2574.2795        | 5.6675            |
| NKX-2883-P1 | -2285.8064       | -2285.5885        | 5.9299            |
| NKX-2883-P2 | -1997.1241       | -1996.8894        | 6.3867            |
| NKX-2883-Q1 | -2423.4130       | -2423.2006        | 5.7796            |
| NKX-2883-Q2 | -2272.3441       | -2272.1212        | 6.0667            |

**Table 21S** Calculated energy (a.u) of the oxidized coumarin dyes in ethanol solvent using M062X functional and the 6-31G(d,p) basis set

| scheme      | Dye <sup>+</sup> | Dye <sup>+2</sup> | $\Delta G(aq)$ |
|-------------|------------------|-------------------|----------------|
| NKX-2311    | -1377.9520       | -1377.5661        | 10.5007        |
| NKX-2677    | -2404.0415       | -2403.6960        | 9.4014         |
| NKX-2677-P1 | -2115.3524       | -2114.9952        | 9.7198         |
| NKX-2677-P2 | -1826.6550       | -1826.2703        | 10.4681        |
| NKX-2700    | -2481.4114       | -2481.0778        | 9.0776         |
| NKX-2700-P1 | -2192.7240       | -2192.3762        | 9.4640         |
| NKX-2700-P2 | -1904.0244       | -1903.6535        | 10.0926        |
| NKX-2883    | -2573.6186       | -2573.2781        | 9.2653         |
| NKX-2883-P1 | -2284.9330       | -2284.5806        | 9.5892         |
| NKX-2883-P2 | -1996.2431       | -1995.8658        | 10.2667        |
| NKX-2883-Q1 | -2422.4781       | -2422.1332        | 9.3851         |
| NKX-2883-Q2 | -2271.3406       | -2270.9868        | 9.6273         |
